# Supplementary material for: Control of endothelial cell polarity and sprouting angiogenesis by non-centrosomal microtubules
Source: eLife. 2018 Mar 16;7:e33864. doi: 10.7554/eLife.33864 (PMC5898915; doi:10.7554/eLife.33864)
Supplement: Figure 1—figure supplement 1—source data 1. [file elife-33864-fig1-figsupp1-data1.xlsx]

## Sheet: Figure 1 Figure Supplement 1A
Figure 1 - Figure Supplement 1A		Oriented Centrosome					Oriented Golgi
Centrosome and Golgi polarization		2D	3D
			Sprouts with polarized centrosome	Sprout total number	%		2D	3D
		(% of cells)			(%per spheroid)			Sprouts with polarized Golgi	Sprout total number	%
		80.0003	3	4	75		(% of cells)			(%per spheroid)
		76.1541	2	2	100		73.3333	3	4	75
		77.0003	5	5	100		83.3333	4	5	80
		85.5558	4	6	66.6667		70	5	5	100
			3	5	60		83.0508	4	6	66.6667
			3	3	100		74	4	5	80
			7	9	77.7778		69.3878	3	3	100
			3	5	60			7	9	77.7778
			3	5	60			3	4	75
			8	9	88.8889			7	7	100
			7	9	77.7778			5	6	83.3333
			5	5	100			7	9	77.7778
			3	3	100			6	6	100
								7	8	87.5
								4	4	100
								3	5	60
								8	9	88.8889
								7	9	77.7778
								5	5	100
								3	3	100

## Sheet: Figure 1 Figure Supplement 1B
Figure 1 - Figure Supplement 1B		γ-tubulin			CEP135			NEDD1			Pericentrin			PCM1			CDKRAP2
Centrosome removal		(% of cells)			(% of cells)			(% of cells)			(% of cells)			(% of cells)			(% of cells)
		Non treated	Centrinone		Non treated	Centrinone		Non treated	Centrinone		Non treated	Centrinone		Non treated	Centrinone		Non treated	Centrinone
		97.2973	20.6897		100	9.09091		95.6522	8.82353		93.75	3.125		100	9.375		96.1538	9.375
		93.75	3.92157		94.5946	11.5385		96.1538	9.52381		97.1429	7.69231		96.2963	6.89655		100	6.25
		100	3.22581		96.1034	6.89655		98.5484	7.40741		100	10.3448		96.4286	10.7143		96.875	7.69231
		100	8.69565

## Sheet: Figure 1 Figure Supplement 1C
Figure 1 - Figure Supplement 1C		Area			Dispersion
Golgi morphology parameters		(%)			(a.u.)
		Non treated	Centrinone		Non treated	Centrinone
		7.87291	9.92459		22.709	31.7608
		3.79181	9.18122		21.0878	26.8149
		1.05901	14.5125		27.8842	26.9249
		2.58678	5.50777		24.5728	59.3404
		5.89866	10.8459		17.8416	36.1758
		6.67565	5.01347		14.8584	25.2849
		7.80963	12.2471		20.605	25.104
		5.30157	7.07153		11.5132	26.6887
		3.83636	3.10229		4.16817	27.1649
		7.08116	3.40539		6.48478	29.4953
		6.70116	12.0647		18.7631	25.9766
		5.79666	8.94109		11.9109	28.7691
		4.5737	9.79816		18.5041	32.1194
		4.6623	8.6352		16.5186	62.4269
		6.18545	6.3047		14.3593	64.2797
		9.4207	8.1065		48.3907	63.6912
		5.78946	6.58324		55.007	63.9937
		4.75984	6.11163		63.5772	76.5935
		6.57371	9.48067		46.544	70.2717
		4.42198	12.9397		56.5811	58.9813
		5.01921	15.8601		50.2922	62.3329
		4.33211	2.90224		51.4498	76.0157
		3.24499	15.8067		51.644	56.2841
		4.13128	7.0703		47.6681	59.2237
		5.63993	3.86241		55.8306	72.4937
		4.25528	3.94587		47.7438	61.9428
		8.07674	8.52274		49.9035	53.1902
		7.00444	11.549		53.6717	66.1955
		6.16414	3.47218		54.3153	61.694
		6.41541	3.66186		49.1791	54.5949
		12.8192	3.86508		45.0382	65.7905
		5.17317	5.08156		47.5287	68.322
		5.93532	10.3308		47.0317	51.8658
		8.15593			62.4548
		8.05451			52.169
		5.86343	8.05176		36.7943	50.6607

## Sheet: Figure 1 Figure Supplement 1D
Figure 1 - Figure Supplement 1D		Nucleation activity			EB enrichment at Golgi
MT nucleation parameters		(% of cells)			(fold enrichment)
		Non treated	Centrinone		Non treated	Centrinone
		93.5484	96.2963		0.950887	5.28909
		92.1053	93.9394		1.38233	2.78289
		95	92		1.13361	1.65197
					0.945754	1.93676
					1.09239	1.42974
					1.12114	1.39243
					1.03339	1.2671
					1.00063	1.27583
					1.00234	3.45747
					1.02762	2.19396
					1.11008	1.56877
					1.07865	4.88732
					1.06726	1.42191
					0.956471	1.36397
					1.53035	1.46756
					1.25995	1.47324
					1.54556	1.96636
					0.647608	1.34898
					1.42793	2.13123
					1.03566	4.18158
