# Supplementary material for: Control of endothelial cell polarity and sprouting angiogenesis by non-centrosomal microtubules
Source: eLife. 2018 Mar 16;7:e33864. doi: 10.7554/eLife.33864 (PMC5898915; doi:10.7554/eLife.33864)
Supplement: Figure 1—figure supplement 2—source data 1. [file elife-33864-fig1-figsupp2-data1.xlsx]

## Sheet: Figure 1 Figure Supplement 2A
Figure 1 - Figure Supplement 2A		α-tubulin signal			Acetylated tubulin signal			Detyrosinated tubulin signal			Polyglutamylated tubulin signal			γ-tubulin signal			Camsap2 signal
Western blot expression		(a.u.)			(a.u.)			(a.u.)			(a.u.)			(a.u.)			(a.u.)
		Non treated	Centrinone		Non treated	Centrinone		Non treated	Centrinone		Non treated	Centrinone		Non treated	Centrinone		Non treated	Centrinone
		5034.11	4246.87		3478.6	5471.4		1441.36	1635.84		6301.45	6819.43		3099.23	2888.41		175.556	379.213
		13683	12948.1		7797.98	6261.96		1220.41	1540.38		6927.81	7789.03		3093.06	3333.89		3014.04	3120.46
		3644.06	6091.6		118.556	238.092		2992.88	4414.35		2064.08	5175.35		3813.53	3964.26		2632.8	1515.58
																	3828.65	1853.77
		Ku80 signal			Ku80 signal			Ku80 signal			Ku80 signal			Ku80 signal			Ku80 signal
		(a.u.)			(a.u.)			(a.u.)			(a.u.)			(a.u.)			(a.u.)
		Non treated	Centrinone		Non treated	Centrinone		Non treated	Centrinone		Non treated	Centrinone		Non treated	Centrinone		Non treated	Centrinone
		120.192	146.142		2883.06	4353.67		2883.06	4353.67		2039.51	2174.39		1656.58	1836.82		3510.7	3227.82
		4312.31	2956.18		3264.75	2359.04		2039.51	2174.39		2883.06	4353.67		2017.75	2171.97		4312.31	2956.18
		2138.8	3803.53		1805.75	3093.58		2816.92	4110.72		1805.75	3093.58		3510.7	3227.82		3264.75	2359.04
																	5252.23	2415.28
		Fold change			Fold change			Fold change			Fold change			Fold change			Fold change
		0.69382			0.96008			0.751569			1.01507			0.840522			2.34937
		1.38039			1.11133			1.18389			0.744537			1.00133			1.51024
		0.940002			1.17224			1.01073			1.46356			1.13063			0.796663
																	1.0529

## Sheet: Figure 1 Figure Supplement 2B
Figure 1 - Figure Supplement 2B
Acetylated tubulin intensity		Non treated	Centrinone
(103 a.u.)		566.947	614.83
		576.161	562.523
		673.004	588.416
		573.328	602.488
		588.52	501.199
		590.033	626.859
		583.227	655.292
		599.034	603.171
		577.231	635.904
		619.159	651.056
		595.025	617.495
		568.705	613.586
		655.325	503.071
		577.79	660.977
		570.927	505.523
		565.411	581.04
		564.578	584.446
		564.559	627.263
		602.587	634.133
		600.283	672.987
		582.901	614.164
		577.606	622.812
		672.885	631.525
		772.486	638.235
		626.158	644.942

## Sheet: Figure 1 Figure Supplement 2C
Figure 1 - Figure Supplement 2C
CAMSAP2 strech density area		Non treated	Centrinone
(% of cell area)		1.55877	3.33777
		1.95854	3.88712
		1.79097	4.90637
		1.7999	4.44448
		1.35583	2.85876
		2.35564	3.39859
		2.11298	2.89143
		2.71381	3.74228
		2.71147	2.49548
		2.00359	2.61015
		2.62154	2.56722
		3.3108	2.69118
		3.73856	1.89283
		3.73174	3.94688
		3.63263	2.42859
		2.93964	1.46166
		1.29409	3.11838
		2.41612	2.53317
		0.681421	2.96522
		1.21274	2.32916

## Sheet: Figure 1 Figure Supplement 2D
Figure 1 - Figure Supplement 2D		VE-Cadherin			ZO-1
Cell-cell junction parameters		Maximum intensity			Maximum intensity
		(103 a.u.)			(103 a.u.)
		Non treated	Centrinone		Non treated	Centrinone
		7105.77	7434.88		5670.64	5842.93
		6629.63	5658.11		5558.85	5672.76
		7403.08	6091.18		5597.33	5840.79
		7661.36	7438.03		5491.44	5598.87
		5713.04	7332.86		6061.55	5818.94
		Peak area			Peak area
		(103 a.u.)			(103 a.u.)
		75728.5	70248.4		64187	61496.4
		77864.4	69842.2		55556.8	36597.7
		67402.1	69715.9		41290.9	44613.3
		74204.8	74874.9		39851.3	50614.4
		77938.7	74657.4		51734.8	55448.2

## Sheet: Figure 1 Figure Supplement 2E
Figure 1 - Figure Supplement 2E		Velocity			Directionality
Cell migration parameters		(µm/min)
		Non treated	Centrinone		Non treated	Centrinone
		0.530797	0.544835		0.639	0.654
		0.626604	0.653074		0.382	0.726
		0.613315	0.75381		0.736	0.363
		0.525331	0.575914		0.552	0.391
		0.545693	0.672149		0.646	0.662
		0.534011	0.576985		0.628	0.509
		0.523188	0.506148		0.712	0.713
		0.687903	0.422558		0.592	0.695
		0.629283	0.508613		0.691	0.403
		0.477213	0.457923		0.536	0.802
		0.497575	0.45578		0.537	0.625
		0.507541	0.632498		0.536	0.592
		0.624674	0.685009		0.653	0.603
		0.538941	0.430703		0.645	0.731
		0.500683	0.478499		0.647	0.571
		0.646108	0.646429		0.669	0.462
		0.54087	0.555445		0.704	0.682
		0.505612	0.567233		0.583	0.462
		0.566162	0.456208		0.472	0.402
		0.615458	0.50079		0.712	0.677

## Sheet: Figure 1 Figure Supplement 2F
Figure 1 - Figure Supplement 2F		CPAP			γ-tubulin
Centrosome removal		(% of cells)			(% of cells)
		Non treated	Centrinone		Non treated	Centrinone
		95.8333	12.9032		98.2353	37.2093
		94.2857	24		97.3262	27.2109
		96.6667	7.14286		97.0339	35.8852

## Sheet: Figure 1 Figure Supplement 2G
Figure 1 - Figure Supplement 2G		Non treated				Centrinone
(% per spheroid)		Sprouts with centrosome	Sprouts without centrosome	%		Sprouts with centrosome	Sprouts without centrosome	%
		5	0	0		4	3	42.8571
		5	2	28.5714		1	4	80
		9	0	0		2	3	60
		4	1	20		1	2	66.6667
		4	1	20		1	4	80
		4	0	0		3	1	25
		5	1	16.6667		2	1	33.3333
		7	0	0		0	3	100
		5	0	0		1	3	75
						2	3	60
						2	2	50
						1	2	66.6667
						1	3	75
						2	2	50
						2	3	60
