# Supplementary material for: Control of endothelial cell polarity and sprouting angiogenesis by non-centrosomal microtubules
Source: eLife. 2018 Mar 16;7:e33864. doi: 10.7554/eLife.33864 (PMC5898915; doi:10.7554/eLife.33864)
Supplement: Figure 1—source data 1. [file elife-33864-fig1-data1.xlsx]

## Sheet: Figure 1A
Figure 1A		Non treated	Centrinone
α-tubulin intensity		895	1041
(103 a.u.)		1000	1127
		1127	979
		846	946
		982	895
		1012	969
		1042	921
		1072	915
		1018	831
		891	949
		861	680
		1046	807
		1035	902
		1054	1087
		1102	979
		1083	940
		891	1025
		919	777
		884	943
		1047	953
		916	1106
		914	890
		1009	918
		898	816
		892	869

## Sheet: Figure 1B
Figure 1B		Growth rate			Catastrophe frequency
EB dynamics parameters		(µm/min)			(min-1)
		Non treated	Centrinone		Non treated	Centrinone
		30.3161	27.1806		0.699219	0.513498
		25.8973	31.8489		0.4945	0.543655
		32.1498	27.9666		0.593823	0.403799
		30.6553	29.8747		0.714812	0.500814
		35.1633	32.8276		1.20052	0.373363
		31.9379	27.114		0.461455	0.770457
		27.4138	27.0693		0.748284	0.482561
		28.368	31.6825		0.762911	0.663532

## Sheet: Figure 1C
Figure 1C		Non treated	Centrinone
EB comets density		31.7257	50.3159
(number/1000µm2)		60.483	45.3048
		49.1927	40.7976
		77.7371	47.592
		49.1731	55.065
		53.0542	49.8036
		70.7672	55.4555
		67.1271	46.7857
		103.757	67.7676
		34.277	52.8666
		47.7558	48.3607
		58.546	67.8312
		27.2706	82.7661
		59.3448	86.8127
		80.5656	44.0259
		62.9185	62.831
		55.006	66.1709
		47.7427	39.5331
		58.4432	48.9558
			66.6758

## Sheet: Figure 1D
Figure 1D		Oriented Golgi			Wound closure area
Cell migration parameters		(% of cells)			(%)
		Non treated	Centrinone		Non treated	Centrinone
		83.0508	80.5556		47.3921	44.722
		74	71.1111		52.3022	75.2653
		69.3878	66.6667		67.782	80.1991
					59.8113	75.2254
					53.1276	49.7108
					57.4435	46.7718
					54.9918	65.4567
					56.1364	58.3457

## Sheet: Figure 1E
Figure 1E		Non treated	Centrinone
Cumulative sprout length per spheroid		1.15857	1.35465
(mm)		1.52459	1.12565
		1.34555	1.72355
		1.54822	1.92362
		1.52899	1.1929
		1.74158	1.3425
		1.09498	1.93329
		1.1553	1.54827
		1.74347	1.63457
		1.73879	1.64558
		1.38239	1.39559
		1.73003	1.64357
		1.34538	1.25444
		1.53348	1.15434
		1.25433	1.39457
		1.65433	1.5674
		1.59251	1.54898
		1.35958	1.2584
		1.49456	1.03875
		1.40274	1.34237
		1.72812	1.73846
		1.54956	0.885362
		1.74257	1.93916
		1.32566	1.28315
		1.42347	1.23138
		1.78349	1.52622
		1.18236	1.29738
		1.28539	1.35247
		1.26448	1.63446
		1.75347	1.28478
		1.37527	1.34312
		1.12947	0.984266
		1.64357	1.98499
		1.48926	1.54836
		1.8735	1.65837
		1.84492	1.15846
		1.63498	1.28332
		1.18436	1.38447
		1.04841	1.64189
		1.62778	1.54847
		1.53876	1.72835
		1.92836	1.5264
		1.43239	1.26839
		1.50236	1.19349
		1.32546	1.02349
		1.15465	0.945255
		1.34539	1.2659
		1.67335	1.56849
		1.63446	0.954265
		1.76239	1.95827
		1.32547	1.23246
		1.23401	1.05436
		1.74349	1.23947
		1.48521	1.10237
		1.38527	1.54838
		1.02941	1.65463
		1.85749	1.19368
		1.83457	1.18474
		1.67436	1.43485
			1.54835
			1.98423

## Sheet: Figure 1F
Figure 1F		Non treated				Centrinone
Sprouts containing centrosome		Sprouts with centrosome	Sprouts without centrosome	%		Sprouts with centrosome	Sprouts without centrosome	%
(% per spheroid)		4	0	0		1	3	75
		4	1	20		1	5	83.3333
		5	0	0		0	3	100
		6	2	25		1	3	75
		5	1	16.6667		1	4	80
		4	0	0		2	2	50
		6	1	14.2857		1	5	83.3333
		4	0	0		1	4	80
		7	1	12.5		0	4	100
		8	1	11.1111		2	4	66.6667

## Sheet: Figure 1H
Figure 1H		Non treated	Centrinone
Cumulative sprout length per spheroid		1.70368	1.91876
(mm)		1.52202	0.990718
		1.2703	1.24382
		1.23642	1.89484
		1.53553	1.19066
		0.887653	1.73263
		1.6239	1.23193
		1.03547	1.57301
		1.58373	1.51527
		1.62221	1.16933
		1.24458	1.39626
		1.32256	1.20538
		1.40902	1.42928
		0.979142	1.60697
		1.33413	1.27239
		1.62135	1.55349
		0.901403	1.38222
		1.25914	1.52778
		1.77054	1.58845
		0.814157	1.24643
		1.53323	1.56621
		1.49029	1.1576
		1.41382	1.52798
		0.993341	1.73905
		1.27699	0.908732
		1.3806	0.946399
		0.862239	0.986452
		1.33763	1.49866
		1.26801	0.768391
		1.14518	1.82695
		1.04253	1.34396
		0.989166	1.04779
		1.76119	1.19532
		1.17629	1.07035
		1.33547	1.1766
		1.00201	1.04126
		0.962378	1.67999
		1.28891	0.715183
		1.53867	1.23988
		1.3931	1.28282
		1.5069	1.20209
		1.51939	1.41815
		1.32234	1.31241
		1.071	1.00235
		1.0551	1.69333
		1.06306	1.1599
		1.03944	1.45898
		1.15233	1.48182
		1.30698	1.34312
		1.11954	1.28755
		1.40103	1.2848
		1.549	1.52214
		1.33967	1.76651
		1.34495	1.20364
		1.67836	1.5434
		1.25845	2.10515
		1.23321	1.50623
		1.59693	1.10247
		1.35158	1.13243
		1.56752	1.84101
		1.41476	1.38887
		1.5649	1.22066
