# Supplementary material for: Control of endothelial cell polarity and sprouting angiogenesis by non-centrosomal microtubules
Source: eLife. 2018 Mar 16;7:e33864. doi: 10.7554/eLife.33864 (PMC5898915; doi:10.7554/eLife.33864)
Supplement: Figure 2—figure supplement 1—source data 1. [file elife-33864-fig2-figsupp1-data1.xlsx]

## Sheet: Figure 2 Figure Supplement 1A
Figure 2 - Figure Supplement 1A		Stretch number			Stretch length
CAMSAP2 stretch parameters		(number per cell)			(µm)
		Non treated	VEGF		Non treated	VEGF
		29	47		1.03601	1.96807
		30	39		1.1761	2.12347
		35	44		1.071	1.88415
		32	64		1.16236	2.77871
		53	34		1.13366	2.47618
		35	49		1.11845	2.51402
		31	41		1.11097	2.36662
		29	37		1.18694	1.91077
		28	39		1.35936	2.20275
		27	42		1.11337	2.78073
		52	49		1.11902	2.25223
		26	43		1.19337	1.98642
		40	58		1.09021	1.94785
		24	53		1.13839	1.36411
		29	59		1.19097	1.48489
		33	66		1.04225	1.88605
		37	43		1.00299	1.24663
		32	48		1.18082	2.82117
		40	38		1.73844	2.47834
		37	33		1.1847	1.73844
		25	43		1.11039	2.15809
		41	44		1.14554	2.19247
		50	42		1.27222	2.31902
		49	51		1.04995	2.25907
		29	39		1.18384	2.05469
		32	30		1.30239	2.60106
		31	38		1.50469	2.52868
		45	31		1.11883	2.33826
		39	34		1.19976	2.14785
		29	59		1.21384	2.75826

## Sheet: Figure 2 Figure Supplement 1C
Figure 2 - Figure Supplement 1C		α-tubulin intensity			EB comets
MT network and dynamics parameters		(103 a.u.)			(number/1000µm2)
		CTL siRNA	CAMSAP2 siRNA		CTL siRNA	CAMSAP2 siRNA
		895	764		31.7257	59.4433
		1000	776		60.483	60.2411
		1127	1214		49.1927	75.7617
		846	1052		77.7371	45.7323
		982	942		49.1731	64.9327
		1012	937		53.0542	28.2613
		1042	987		70.7672	53.6976
		1072	947		67.1271	51.5078
		1018	974		103.757	40.804
		891	1021		34.277	46.2399
		861	933		47.7558	42.4065
		1046	1122		58.546	71.9445
		1035	843		27.2706	61.7321
		1054	930		59.3448	76.9359
		1102	1031		80.5656	81.3517
		1083	1224		62.9185	73.0574
		891	1325		55.006	48.1399
		919	1254		47.7427	34.0522
		884	1031		58.4432	75.6109
		1047	995			72.9594
		916	1053			89.0288
		914	982
		1009	989
		898	831
		892	838

## Sheet: Figure 2 Figure Supplement 1E
Figure 2 - Figure Supplement 1E		α-tubulin signal			Acetylated tubulin signal			Detyrosinated tubulin signal			Polyglutamylated tubulin signal			γ-tubulin signal			Camsap2 signal
Western blot expression		(a.u.)			(a.u.)			(a.u.)			(a.u.)			(a.u.)			(a.u.)
		CTL siRNA	CAMSAP2 siRNA		CTL siRNA	CAMSAP2 siRNA		CTL siRNA	CAMSAP2 siRNA		CTL siRNA	CAMSAP2 siRNA		CTL siRNA	CAMSAP2 siRNA		CTL siRNA	CAMSAP2 siRNA
		5108.23	4305.28		4766.31	4848.48		1357.06	1366.82		6996.86	6906.62		3291.77	4074.53		244.385	34.536
		7072.33	11075.8		3824.43	4912.43		1543.72	1621.26		8949.02	8013.75		4191.72	3576.18		1627.28	212.728
		3561.7	4068.23		83.021	135.849		3830.45	4422.93		3192.66	4945.62		4349.26	4729.72		1647.41	102.071
		Ku80 signal			Ku80 signal			Ku80 signal			Ku80 signal			Ku80 signal			Ku80 signal
		(a.u.)			(a.u.)			(a.u.)			(a.u.)			(a.u.)			(a.u.)
		CTL siRNA	CAMSAP2 siRNA		CTL siRNA	CAMSAP2 siRNA		CTL siRNA	CAMSAP2 siRNA		CTL siRNA	CAMSAP2 siRNA		CTL siRNA	CAMSAP2 siRNA		CTL siRNA	CAMSAP2 siRNA
		1210.02	1380.61		2960.46	1911.99		2960.46	1911.99		1596.74	1859.41		2404.75	2490.21		3590.7	3647.28
		2717.87	2937.23		1641.46	2173.99		1596.74	1859.41		2960.46	1911.99		1456.16	1330.28		2717.87	2937.23
		1453.53	1865.58		1009.28	2837.75		1033.28	1835.82		1009.28	2837.75		3590.7	3647.28		1641.46	2173.99
		Fold change			Fold change			Fold change			Fold change			Fold change			Fold change
		0.735879			1.57506			1.5595			0.847661			1.19531			0.139126
		1.44911			0.969843			0.901868			1.38654			0.933885			0.120963
		0.889936			0.58198			0.649906			0.550944			1.07061			0.0467814

## Sheet: Figure 2 Figure Supplement 1F
Figure 2 - Figure Supplement 1F		Nucleation activity				EB enrichment at centrosome			EB enrichment at Golgi
MT nucleation parameters		(% of cells)				(fold enrichment)			(fold enrichment)
		CTL siRNA	CAMSAP2 siRNA			CTL siRNA	CAMSAP2 siRNA		CTL siRNA	CAMSAP2 siRNA
		77.2727		75.641		1.9068	2.26589		0.950887	0.901486
		83.3333		84.507		2.77472	1.77426		1.38233	1.29292
		85.2941		82.5		0.656418	2.14994		1.13361	1.15919
						3.49817	0.844205		0.945754	0.936413
						3.38762	2.05657		1.09239	1.04429
						0.626788	1.52323		1.12114	0.827878
						1.74023	1.32874		1.03339	0.878799
						0.997194	2.14649		1.00063	0.956755
						1.84727	2.04918		1.00234	1.00952
						3.72831	1.32864		1.02762	0.895518
						2.33622	1.73821		1.11008	1.05047
						2.21802	1.67378		1.07866	0.442798
						0.736025	2.87167		1.06726	1.03333
						1.97868	1.22703		0.956471	1.06956
						2.5386	2.65164		1.53035	1.40298
						0.984307	3.52929		1.25995	1.1894
						1.04055	2.3163		1.54556	1.29241
						1.22398	1.40687		0.647608	1.22985
						1.68107	1.97681		1.42793	0.980763
						1.31466	2.72088		1.03566	1.43962

## Sheet: Figure 2 Figure Supplement 1H
Figure 2 - Figure Supplement 1H		Number of tracks			Speed			Length
KIF13B track parameters		( number per cell)			(µm/s)			(µm)
		CTL siRNA	CAMSAP2 siRNA		CTL siRNA	CAMSAP2 siRNA		CTL siRNA	CAMSAP2 siRNA
		511	226		1.84714	1.99316		1.68994	1.44817
		178	293		1.51869	1.80866		2.05107	1.99217
		170	219		1.69469	1.72602		1.56776	1.77561
		225	303		2.02377	1.73429		1.55791	1.83288
		269	256		1.84691	1.73249		2.61737	1.60753
		482	160		2.04302	1.98501		1.98528	1.60321
		478	328		1.82969	1.46037		2.44679	2.01076
		362	459		2.07613	1.88915		2.02663	1.16316
		541	401		1.87864	1.78554		2.36812	1.87418
		319	242		1.69915	1.91324		2.20401	1.79952
		113	223		1.74448	1.62122		2.05964	1.99507
		518	332		2.07926	1.76677		1.66981	1.55661
		227	218		1.64408	1.90782		1.86183	1.69558
		160	190		1.56036	1.79302		1.86337	2.05604
		210	510		1.96558	1.74375		1.42086	1.97392
		368	247		1.88438	1.78649		2.27225	1.98164
		202	429		1.74643	2.01995		2.05302	1.661
		204	147		2.07182	1.81263		1.64868	2.09347
		273	321		2.20572	1.16193		1.82141	1.7405
		307	294		0.934185	2.20572		2.04159	2.14014

## Sheet: Figure 2 Figure Supplement 1I
Figure 2 - Figure Supplement 1I
Migration speed		CTL siRNA	CAMSAP2 siRNA
(µm/min)		0.829684	0.756168
		0.954212	0.878338
		1.08324	0.654145
		1.04873	0.863335
		1.02173	0.658646
		0.484608	0.633141
		0.555123	0.876195
		0.727662	0.639142
		0.958713	0.645143
		0.691868	0.71866
		0.973716	0.58513
		1.08474	0.756168
		0.970716	0.601634
		0.708157	0.880696
		0.715016	0.63014
		0.481607	0.67665
		0.651145	1.00651
		0.667863	0.852189
		0.742665	0.817682
		0.99022	0.879195
		1.11625	0.907702
		0.757668	0.828184
		1.14776	0.979718
		0.924205	0.711158
		0.852189	0.783174
		0.651145	0.705157
		0.937708	0.579129
		0.711158	0.715659
		1.02173	0.823683
		0.733877	0.817682
		0.906201	0.784674
		0.822183	0.742665
		0.886697	0.781674
		1.01723	0.627139
		1.05173	0.747166
		0.892698	0.691654
		0.687153	0.736664
		0.68651	0.717159
		0.871694	0.622638
		0.886697	0.874694
		1.07274	1.03823
		0.925706	0.975002
		0.912203	0.655646
		0.774172	0.823683
		0.753167	0.724661
		0.862692	0.639142
		0.889698	0.591131
		0.903201	0.616637
		0.822183	0.81168
		0.976717	0.885197
		0.724661	0.934708
		0.885197	0.846188
		0.997722	0.904701
		0.661861	0.841687
		0.724018	0.792176
		0.967715	0.94371
		0.711158	0.654145
		0.738164	0.889698
		0.823683	0.775672
		0.940709	0.886697
