# Supplementary material for: Control of endothelial cell polarity and sprouting angiogenesis by non-centrosomal microtubules
Source: eLife. 2018 Mar 16;7:e33864. doi: 10.7554/eLife.33864 (PMC5898915; doi:10.7554/eLife.33864)
Supplement: Figure 2—figure supplement 2—source data 1. [file elife-33864-fig2-figsupp2-data1.xlsx]

## Sheet: Figure 2 Figure Supplement 1A
Figure 2 - Figure Supplement 1A		Stretch number			Stretch length
CAMSAP2 stretch parameters		(number per cell)			(µm)
		Non treated	VEGF		Non treated	VEGF
		29	47		1.03601	1.96807
		30	39		1.1761	2.12347
		35	44		1.071	1.88415
		32	64		1.16236	2.77871
		53	34		1.13366	2.47618
		35	49		1.11845	2.51402
		31	41		1.11097	2.36662
		29	37		1.18694	1.91077
		28	39		1.35936	2.20275
		27	42		1.11337	2.78073
		52	49		1.11902	2.25223
		26	43		1.19337	1.98642
		40	58		1.09021	1.94785
		24	53		1.13839	1.36411
		29	59		1.19097	1.48489
		33	66		1.04225	1.88605
		37	43		1.00299	1.24663
		32	48		1.18082	2.82117
		40	38		1.73844	2.47834
		37	33		1.1847	1.73844
		25	43		1.11039	2.15809
		41	44		1.14554	2.19247
		50	42		1.27222	2.31902
		49	51		1.04995	2.25907
		29	39		1.18384	2.05469
		32	30		1.30239	2.60106
		31	38		1.50469	2.52868
		45	31		1.11883	2.33826
		39	34		1.19976	2.14785
		29	59		1.21384	2.75826

## Sheet: Figure 2 Figure Supplement 2A
Figure 2 - Figure Supplement 2A		Mitotic index				Doubling time
Proliferation parameters		(%)				(h)
		CTL siRNA	CAMSAP2 siRNA #1	CAMSAP2 siRNA #2		CTL siRNA	CAMSAP2 siRNA #1	CAMSAP2 siRNA #2
		5.79472	3.69404	5.28494		36.3687	29.3767	28.7439
		5.18903	5.39227	5.49301		31.9483	23.6367	23.6349
		4.53782	5.10984	3.88356		24.9377	27.2548	31.3469

## Sheet: Figure 2 Figure Supplement 2B
Figure 2 Figure Supplement 2B
Cumulative sprout length per spheroid		CTL siRNA	CAMSAP2 siRNA	CTL siRNA	CAMSAP2 siRNA
(mm)		Non treated	Non treated	Thymidine	Thymidine
		1.25458	1.10994	0.342922	0.288655
		1.34579	1.03958	0.143549	0.495571
		1.68791	1.6475	0.0763982	0.19346
		1.47446	1.18447	0.12657	0.0757834
		1.28703	1.84583	0.305876	0.17459
		1.27704	0.59346	0.276674	0.284573
		1.5025	1.00289	0.453895	0.80254
		1.18767	1.99331	0.532115	0.0748032
		1.06555	1.80344	0.0677438	0.954509
		1.19956	1.74355	0.194769	0.753589
		0.934594	1.84306	0.177043	0.418643
		1.07149	1.9328	0.178873	0.0927348
		1.53039	1.96573	0.083987	0.733384
		0.994384	1.20343	0.117643	0.431039
		0.973489	1.78043	0.14955	0.322409
		0.734942	0.934541	0.255894	0.493271
		1.28649	1.05646	0.271784	0.173202
		1.10939	1.26038	0.201044	0.24823
		1.31639	1.59348	0.293578	0.449327
		1.47347	1.4816	0.249985	0.362587

## Sheet: Figure 2 Figure Supplement 2D
Figure 2 Figure Supplement 2D
Cumulative sprout length per spheroid		CTL siRNA	CAMSAP2 siRNA	CAMSAP3 siRNA	CAMSAP2+3 siRNA
(mm)		1.02637	0.223568	1.03563	0.0820433
		0.893387	0.189376	1.6329	0.253785
		1.95384	0.123573	0.798678	0.183097
		1.45347	0.324549	1.64393	0.12498
		1.3925	0.432482	0.80949	0.289754
		1.30949	0.102463	1.39788	0.184093
		1.98398	0.333938	1.29831	0.165555
		1.72335	0.152374	1.19364	0.16399
		1.64893	0.178467	1.53607	0.372046
		1.04504	0.293487	0.929079	0.241653
		1.17559	0.49358	1.39064	0.241507
		0.92349	0.643293	0.68354	0.182368
		1.43295	0.102473	1.96748	0.0836922
		1.34249	0.0435932	1.73205	0.0614766
		1.62393	0.0934032	1.16494	0.205064
		1.46384	0.182492	1.15009	0.328834
		1.35238	0.293391	0.734754	0.234036
		0.635472	0.493593	1.65904	0.323659
		1.68689	0.102493	1.5345	0.18235
		0.553287	0.0984922	0.76489	0.201678
		1.17429	0.0490932	1.64332	0.293673
		1.3295	0.0923921	2.09535	0.250746
		1.18938	0.190483	1.04492	0.306498
		1.56349	0.392498	1.83955	0.227642
		0.639363	0.102493	1.94465	0.16459
		1.03748	0.15395	1.92393	0.260579
		1.43849	0.149509	1.89509	0.199039
		0.839378	0.163973	0.834498	0.304589
		1.08329	0.11066	1.83458	0.21149
		1.27824	0.0466053	0.904034	0.155483
		1.43249	0.121674	0.977043	0.19474
		0.937482	0.149671	1.03439	0.163097
		0.728873	0.198097	1.90376	0.284569
		0.664379	0.201398	1.04448	0.723407
		1.02347	0.182468	0.523578	0.372983
		1.5435	0.104676	1.35677	0.233648
		0.928483	0.0936578	0.84304	0.234754
		1.38428	0.0837895	1.63466	0.0734983
		1.03642	0.193655	1.26676	0.532798
		0.765489	0.263049	0.48705	0.743484
		1.16578	0.17379	1.50288	0.254644
		1.09377	0.153509	1.83464	0.432484
		1.26438	0.165679	1.09834	0.273489
		1.67349	0.0565362	1.56877
		1.02983	0.102635	1.15544
		1.45349	0.112673	1.04376
		1.36439	0.193893	1.03448
		0.683827	0.393074	1.50965
		0.643382	0.291521	1.74863
		1.17858	0.372471	1.64309
		1.43259	0.702579	0.954467
		1.27454	0.173983	0.898547
		1.67835	0.192798	1.67468
		1.43548	0.107783	0.687684
		1.17848	0.113349	1.96347
		1.53251	0.154983	0.945897
		0.792267	0.298492	1.6739
		0.923482	0.0874932	1.73488
		1.02956	0.0534921	1.90265
		1.27458	0.392492	1.83407
		0.832483	0.162493	0.604637
		1.04547	0.271405	1.29979
		1.17803	0.0730876	0.743985
		0.73648	0.423498	1.03473
		1.20198	0.283509	1.04365
		1.0294	0.0834932	0.966488
		0.829492	0.201509	0.632035
		1.02948	0.148093
		0.928472	0.18731
		1.19336	0.17259
		1.53218	0.101438
		1.28449	0.234594
		1.23848	0.0745832
		1.14384	0.0529423
			0.0993022
			0.172392
			0.192456
			0.253492
