# Supplementary material for: Control of endothelial cell polarity and sprouting angiogenesis by non-centrosomal microtubules
Source: eLife. 2018 Mar 16;7:e33864. doi: 10.7554/eLife.33864 (PMC5898915; doi:10.7554/eLife.33864)
Supplement: Figure 2—source data 1. [file elife-33864-fig2-data1.xlsx]

## Sheet: Figure 2D
Figure 2D		Growth rate			Catastrophe frequency
EB dynamics parameters		(µm/min)			(min-1)
		CTL siRNA	CAMSAP2 siRNA		CTL siRNA	CAMSAP2 siRNA
		32.8921	32.3348		0.223962	0.403598
		28.7709	29.1933		0.83273	0.271126
		26.1578	25.3511		0.614754	0.785733
		24.2986	31.7529		1.02167	0.623087
		28.2126	38.3882		0.18177	0.570961
		27.8785	33.0312		0.592326	0.711409
		22.0804	24.7844		0.343523	0.652798
		19.9154	34.466		0.282557	0.490723
		40.6393	25.934		0.529042	0.617675
		33.8606	26.3292		0.634568	0.555486
		30.6283	26.4531		0.546564	0.335795

## Sheet: Figure 2E
Figure 2E
Wound closure area		CTL siRNA	CAMSAP2 siRNA
(%)		77.9287	27.844
		60.0199	39.3827
		53.028	57.9381
		85.4175	61.9403
		85.463	60.4838
		55.8327	42.8493
		78.3785	32.8473
		83.8475	33.4936
		50.3748	47.8349
		69.8477	32.0395
		75.3736	66.3985
		80.4033	55.5706

## Sheet: Figure 2G
Figure 2G		Cumulative sprout length per spheroid				Number of sprout				Length of sprout
Spheroid sprout parameters		(mm)				(number per spheroid)				(µm)
		CTL siRNA	CAMSAP2 siRNA#1	CAMSAP2 siRNA#2		CTL siRNA	CAMSAP2 siRNA#1	CAMSAP2 siRNA#2		CTL siRNA	CAMSAP2 siRNA#1	CAMSAP2 siRNA#2
		1.30135	0.322129	0.442981		52.3667	19.3645	25.6743		25	11	11
		1.40233	0.0987622	0.321849		57.2893	15.4852	19.5647		19	4	14
		1.46525	0.234684	0.420837		56.2743	25.4673	31.5763		32	8	8
		1.90237	0.0993621	0.390382		58.6548	20.4823	15.3258		25	8	13
		0.909455	0.119374	0.492648		70.5454	21.3752	25.6985		26	9	11
		1.34756	0.145293	0.331382		58.3671	14.3985	22.5738		31	6	11
		1.39435	0.0504019	0.593827		67.3621	11.5672	29.5661		18	8	10
		1.67506	0.321094	0.658659		54.5832	19.4627	39.6587		28	5	9
		1.10437	0.425231	0.125982		64.3921	18.4387	12.5623		27	8	12
		1.29003	0.0925648	0.483484		61.4931	28.4621	19.4562		24	10	10
		1.03451	0.0946541	0.562305		60.4736	16.4623	25.4635		29	8	8
		1.92261	0.0479173	0.39603		59.5742	25.6458	21.4562		19	3	14
		1.13478	0.364982	0.251746		52.5647	18.3553	18.4635		23	6	11
		0.934562	0.0420193	0.352847		51.9384	13.5742	15.3662		25	5	11
		0.992545	0.14262	0.429384		56.4624	15.4558	22.5099		24	6	13
		1.33254	0.102893	0.490382		48.5901	19.4632	35.6871		23	6	11
		1.00334	0.0927934	0.607383		55.2763	11.4672	29.5647		21	8	13
		1.59011	0.402573	0.298183		52.3741	11.5623	35.4008		22	8	12
		1.17166	0.593983	0.398273		52.3752	22.5881	14.6783		27	12	15
		1.051	0.148473	0.647398		92.3942	21.4563	12.4602		20	8	16
		1.45622	0.329039	0.478398		57.2834	15.4721	19.4652		22	3	12
		1.38177	0.221483	0.536293		48.3443	11.5855	11.5763		27	9	13
		0.863984	0.0824573	0.409309		52.3382	23.6741	38.5611		24	13	10
		1.34266	0.0932831	0.362395		70.6345	20.1034	32.0636		22	8	8
		1.49111	0.0559382	0.534987		75.3871	17.5627	39.5711		24	8	10
		1.11946	0.293495	0.573877		59.6372	19.0029	11.4738		25	6	9
		1.28247	0.12975	0.493303		46.2873	19.5462	13.8789		27	9	11
		1.40139	0.117392	0.418325		62.3742	23.6734	13.5742		21	9	12
		1.19239	0.0839281	0.387276		83.5482	26.5622	23.6712		27	10	14
		1.38242	0.294084	0.301464		39.4763	16.3742	19.4621		26	11	13
		1.40999	0.187479	0.350428		57.4731	16.3472	42.5799		30	5	7
		1.13576	0.0948932	0.362659		48.4893	12.5647	12.4623		21	8	9
		1.14053	0.0623049	0.298352		72.3945	26.4623	39.0365		23	9	11
		1.62353	0.392587	0.458155		53.5893	14.6843	14.7563		24	4	14
		0.93293	0.483493	0.289453		53.5483	12.3645	23.6743		20	9	13
		1.34533	0.172284	0.372587		59.2635	24.6593	22.5634		20	4	10
		1.19843	0.284392	0.198328		49.3852	29.4637	16.5487		19	8	11
		1.43922	0.0834938	0.473192		50.4672	16.3485	32.9874		23	9	8
		1.19393	0.104584			48.4583	21.3622			22	9
		1.52448	0.203493			58.4538	22.5672			22	4
		1.14894	0.0623029			62.3847	12.4633			26	5
		1.09347	0.285744			58.3941	17.4637			23	9
		1.43238	0.111473			60.3948	15.3811			21	4
		1.10289	0.0874632			59.6953	12.5642			24	6
		1.09399	0.192394			50.4582	11.3845			19	5
		1.39497	0.0623948			39.6313	14.6321			29	9
		1.69209	0.0723041			60.2811	23.6587			25	11
		1.18403	0.052394			61.4856	17.8546			23	6
		1.2395	0.0583094			45.4829	11.5647			22	6
		1.26922	0.126374			50.3723	18.3874			21	5
		1.30973	0.0796453			85.3948	20.5742			21	10
		1.2746	0.423482			52.2099	24.6658			22	5
		1.38204	0.0593623			49.2874	16.9548			21	5
		1.17306	0.283274			61.4938	17.7478			20	12
		1.29384	0.180376			58.3872	26.5489			22	7
		1.19937	0.0623647			49.5731	15.6476			24	6
		1.02937	0.193456			62.5746	22.5688			23	9
		1.39443				68.3847				23
		1.39203				60.0938				25
		1.32929				58.3984				26
		1.40298				52.5888				20
		1.56393				82.4532				22
		1.19235				93.8452				24
		1.03495				48.2039
		1.58237				82.4831

## Sheet: Figure 2H
Figure 2H		CTL siRNA	CAMSAP2 siRNA	Rescue
Cumulative sprout length per spheroid		1.54834	0.256248	1.54827
(mm)		1.07257	0.359385	0.598265
		1.72347	0.213462	0.594033
		1.23445	0.125462	0.845374
		1.4374	0.264476	1.12074
		1.53459	0.174643	1.10347
		1.25437	0.425457	0.653492
		1.27503	0.391588	0.532572
		1.02559	0.512573	1.17846
		1.78678	0.33821	0.983587
		1.6345	0.743387	0.607672
		1.84347	0.387487	1.27447
		0.932493	0.490784	0.947237
		1.62347	0.254385	0.498578
		1.42733	0.136375	1.1901
		1.08938	0.37249	1.13533
		1.27447	0.298384	0.495382
		1.5259	0.832674	0.372467
		1.16446	0.30465	1.56356
		1.20247	0.483492	0.658565
		1.13447	0.395467	0.854574
		1.05748	0.468459	0.984574
		1.02636	0.480564	0.734853
		1.17346	0.258464	0.509395
		1.09326	0.51249	1.03446
		1.76347	0.600489	1.34815
		1.17447	0.338674	1.25423
		1.0644	0.546382	1.09236
		1.54346	0.330573	0.923463
		1.16428	0.392567	1.12584
		1.18785	0.238483	0.848738
		1.07393	0.568265	1.15466
		1.17848		0.598655
		1.60266
		1.02546
		1.35446
		1.34247
		1.35478
		1.04827
