# Supplementary material for: Control of endothelial cell polarity and sprouting angiogenesis by non-centrosomal microtubules
Source: eLife. 2018 Mar 16;7:e33864. doi: 10.7554/eLife.33864 (PMC5898915; doi:10.7554/eLife.33864)
Supplement: Figure 3—figure supplement 1—source data 1. [file elife-33864-fig3-figsupp1-data1.xlsx]

## Sheet: Figure 3 Figure Supplement 1A
Figure 3 - Figure Supplement 1A		Sprout number						Sprout length
Sprout formation dynamics parameters								(μm)
		CTL siRNA						CTL siRNA
		2h	4h	8h	12h	20h		2h	4h	8h	12h	20h
		10	17	18	17	24		21.4589	39.9541	59.8934	59.6523	50.3872
		12	15	29	21	26		26.4893	33.0944	52.7783	52.1568	58.3833
		16	21	23	21	21		19.1891	39.8723	55.8435	54.8949	47.9221
		9	21	19	19	19		7.1632	31.3872	45.8711	45.4918	45.4713
		11	19	29	18	18		19.9822	29.9001	49.0453	43.0228	49.4839
		12	23	26	21	19		11.9832	32.6738	50.1983	52.9843	50.4656
		16	18	16	17	17		17.8033	28.8097	54.9032	45.4721	42.8944
		10	15	19	25	19		19.8743	32.9483	57.1884	59.9843	50.5492
		8	16	21	24	22		22.7842	39.9843	55.8795	54.6423	61.9873
		11	14	25	15	20		11.3283	33.3428	58.9851	61.519	54.6977
		12	19	24	17	21		9.2302	28.8902	56.1563	55.0932	53.349
		10	20	23	17	22		19.3679	22.4955	59.0923	58.0843	55.5035
		10	17	22	18	17		13.0411	29.4581	60.9341	51.0324	55.5498
		11	18	19	17	18		10.9211	27.0555	59.0873	50.9423	56.1893
		11	15	29	18	18		10.9833	35.9764	54.9143	53.8732	59.0254
		13	16	16	28	21		14.0211	30.8793	56.9434	48.1894	58.0423
		10	17	19	16	18		16.8342	31.3992	45.9841	40.0238	48.3822
		14	17	21	19	19		11.9832	37.9023	52.4984	49.8324	48.8746
		13	14	25	21	21		12.7831	34.3281	53.7612	44.9322	49.9879
		13	13	23	20	22		12.4589	39.8422	50.2655	51.8322	52.8932
		CAMSAP2 siRNA						CAMSAP2 siRNA
		10	10	15	7	7		11.5498	17.4892	23.6493	21.4302	15.4683
		11	13	13	6	6		9.0955	14.5492	23.9283	15.9585	14.5901
		12	14	14	8	7		13.9538	17.9538	21.0866	22.0383	14.8527
		10	16	9	9	7		8.9473	11.5983	20.9843	18.4376	11.4749
		11	9	12	7	9		11.5307	19.496	28.4937	23.0221	17.4578
		9	12	10	10	10		8.0563	18.8527	26.2478	16.5839	18.3589
		11	15	7	10	4		11.872	17.6502	21.4687	17.8595	12.5985
		12	8	11	8	9		12.5039	14.6501	23.548	21.8751	14.8743
		10	13	13	7	11		9.0284	14.0563	23.6903	24.6821	17.9568
		10	14	13	9	5		15.5689	17.0224	21.5055	23.9484	21.9322
		9	12	14	7	6		6.0243	11.8026	24.0343	17.6953	13.9823
		9	12	9	8	7		9.9854	11.0356	18.0833	15.3022	21.5985
		10	10	8	11	7		10.0333	11.0524	19.5444	17.9527	14.0505
		11	11	8	5	9		11.4084	15.9473	23.5087	21.4208	25.9058
		11	15	9	8	7		7.4973	10.6431	16.0486	17.0124	15.3092
		9	14	10	7	8		9.5387	13.8603	16.9877	13.9424	18.0154
		10	15	15	8	8		8.9345	16.0583	26.0132	20.4398	21.5905
		9	10	10	9	3		13.683	18.9283	21.5402	17.0493	15.5827
		10	10	9	13	11		9.5872	12.589	19.0823	15.4389	16.0562
		11	12	12	12	8		15.5922	18.0842	24.5972	21.5985	18.0253

## Sheet: Figure 3 Figure Supplement 1C
Figure 3 - Figure Supplement 1C
Protrusion parameters		Total protrusion length			Average protrusion length
		(μm)			(μm)
		CTL siRNA	CAMSAP2 siRNA		CTL siRNA	CAMSAP2 siRNA
		72.6816	123.296		13.1725	15.412
		65.8624	109.327		14.8758	21.8655
		61.0571	116.311		22.7372	18.6387
		68.2116	38.0592		32.6122	19.0296
		65.2244	48.078		17.9105	12.0195
		89.5527	117.753		15.9111	15.6626
		63.6445	63.4952		28.7797	15.8738
		57.5595	110.313		16.6752	27.5782
		60.225	78.6642		15.0563	19.6661
		97.1326	79.012		19.4265	19.753
		48.957	140.339		20.1498	20.0485
		64.8731	65.8051		30.9459	13.161
		123.784	82.391		41.9283	18.088
		83.8565	111.878		30.1647	18.6464
		120.659	125.495		25.9698	25.0991
		103.879	204.154		32.2522	34.0257
		108.045	147.176		55.4219	25.9237
		221.687	75.1317		37.7888	25.0439
		302.31	257.616		47.751	42.936
		95.502	213.677		45.1685	42.7355
		159.961	180.16		53.3773	45.0399
		106.755			24.5956
		122.978			44.1633

## Sheet: Figure 3 Figure Supplement 1E
Figure 3 - Figure Supplement 1E
Rose diagram of the relative lengths binned by angle
		CTL siRNA					CAMSAP2 siRNA
		angle bin edges	average length	number of protrusions			angle bin edges	average length	number of protrusions
		0	0.526458	2			0	0.679582	2
		0.349066	0.432868	7			0.349066	0.724291	6
		0.698132	0.565521	2			0.698132	0.741463	5
		1.0472	0.31557	2			1.0472	0.611061	2
		1.39626	NaN	0			1.39626	0.70626	2
		1.74533	NaN	0			1.74533	0.701307	4
		2.0944	0.456395	4			2.0944	0.567071	3
		2.44346	0.49976	10			2.44346	0.725807	8
		2.79253	0.707981	9			2.79253	0.66862	3
		3.14159	0.516584	6			3.14159	0.770895	3
		3.49066	0.599041	5			3.49066	0.630996	3
		3.83972	0.338776	1			3.83972	0.712175	5
		4.18879	0.395594	2			4.18879	0.566742	5
		4.53786	NaN	0			4.53786	0.828673	1
		4.88692	NaN	0			4.88692	NaN	0
		5.23599	0.328844	3			5.23599	0.663927	6
		5.58505	0.332034	3			5.58505	0.645012	7
		5.93412	0.667396	4			5.93412	0.805301	3
		6.28319					6.28319

## Sheet: Figure 3 Figure Supplement 1F
Figure 3 - Figure Supplement 1F
		Relative length	Polarity index	Relative length	Polarity index
		CTL siRNA		CAMSAP2 siRNA
		0.809912	0.963199	0.806157	0.684964
		0.247221	0.366174	0.678903	0.404027
		0.355993	0.204791	0.684185	0.261721
		0.686855	0.885652	0.733045	0.874909
		0.394168	0.626883	0.539765	0.0503009
		0.365926	0.452744	0.606726	0.213927
		0.348255	0.0736422	0.441655	0.0868027
		0.516603	0.970648	0.693291	0.623501
		0.737406	0.169618	0.748147	0.46435
		0.922178	0.625539	0.648106	0.305743
		0.638404	0.761653	0.710462	0.116324
		0.875898	0.634977	0.85285	0.381592
		0.259887	0.26277	0.614757	0.00833109
		0.338776	0.186341	0.709952	0.0729012
		0.307223	0.385343	0.715518	0.370097
		0.464518	0.627061	0.619194	0.625361
		0.517221	0.638815	0.653018	0.207487
		0.436314	0.729702	0.653175	0.52163
		0.239803	0.584608	0.681855	0.261333
		0.719518	0.421829	0.32462	0.603413
		0.989198	0.719987	0.541099	0.30826
		0.675479	0.818726	0.955084	0.405612
		0.26366	0.358979	0.874275	0.452408
		0.288513	0.798102	0.638467	0.0202462
		0.653474	0.907786	0.582063	0.110066
		0.737524	0.607229	0.628252	0.739378
		0.312868	0.286664	0.940336	0.545683
		0.244353	0.592658	0.973162	0.285808
		0.564342	0.9889	0.954486	0.20384
		0.475925	0.487433	0.615784	0.228165
		0.349243	0.63766	0.757874	0.17906
		0.420913	0.396903	0.859283	0.592004
		0.413776	0.197443	0.415678	0.427267
		0.537974	0.881596	0.650026	0.364151
		0.826784	0.655701	0.764775	0.659424
		0.70253	0.899117	0.394022	0.3739
		0.419315	0.198725	0.808767	0.426323
		1.05875	0.879309	0.828673	0.0128386
		0.363896	0.430018	0.730913	0.842549
		0.321479	0.619043	0.626777	0.0292709
		0.393636	0.240854	0.691435	0.557054
		0.406021	0.0207135	0.340248	0.062208
		0.334843	0.955369	0.246796	0.312608
		0.989505	0.72495	0.895401	0.285588
		0.47957	0.671282	0.597695	0.54741
		0.329482	0.598516	0.479122	0.165421
		0.538218	0.637334	0.626505	0.578616
		0.492861	0.971834	0.980925	0.827899
		0.385167	0.0360206	0.530372	0.946078
		0.151088	0.479527	0.750723	0.235034
		0.699678	0.651788	0.694216	0.301285
		0.629047	0.962066	0.321124	0.477531
		0.531123	0.247286	0.67498	0.380618
		0.282886	0.0855835	0.51166	0.0473863
		0.295194	0.782095	0.750469	0.614915
		0.792227	0.577682	0.577639	0.305103
		0.797865	0.828329	0.797762	0.00494096
		0.450846	0.484648	0.79443	0.450831
		0.616602	0.71791	0.799771	0.67143
		0.519148	0.307391	0.742444	0.837294
				0.920466	0.552085
				0.748139	0.7103
				0.838634	0.27212
				0.628821	0.758654
				0.928733	0.05058
				0.831275	0.11697
				0.689236	0.257124
				0.664905	0.166683

## Sheet: Figure 3 Figure Supplement 1G
Figure 3 Figure Supplement 1G
Protrusion numer		CTL siRNA													Mean
		0	0	1	0	2	0	0	0	1	0	0	0		0.333333
		1	1	0	1	1	0	0	0	1	2	0	1		0.666667
		1	3	1	1	2	2	2	2	0	1	2	3		1.66667
		2	0	2	2	0	3	1	3	0	2	0	1		1.33333
		2	4	2	3	2	4	3	2	2	3	3	2		2.66667
		2	2	1	2	1	2	2	2	2	2	2	0		1.66667
		3	1	3	1	3	3	5	1	2	3	1	2		2.33333
		2	1	2	1	1	1	3	3	2	2	1	1		1.66667
		1	3	3	3	1	2	3	4	1	3	2	2		2.33333
		4	4	4	5	5	4	4	5	1	5	3	4		4
		4	2	4	3	4	4	4	4	3	3	2	3		3.33333
		3	1	6	4	3	3	3	5	2	5	2	3		3.33333
		4	3	4	4	5	2	5	4	3	5	2	3		3.66667
		6	5	5	5	4	5	6	6	3	5	5	5		5
		4	2	3	3	4	3	3	3	3	4	3	4		3.25
		4	4	3	5	6	5	4	4	4	3	3	3		4
		5	2	3	4	5	4	7	4	4	5	2	3		4
		5	3	7	5	6	6	5	4	5	5	4	5		5
		5	2	3	2	3	3	3	6	5	3	2	3		3.33333
		4	2	3	3	2	3	4	4	3	4	2	2		3
		3	3	3	2	3	2	3	4	5	3	2	3		3
		3	1	3	2	2	2	2	2	4	3	2	2		2.33333
		3	4	3	3	3	3	3	3	5	3	3	4		3.33333
		3	3	2	3	2	1	4	3	4	3	2	2		2.66667
		2	3	3	2	2	3	3	2	3	3	3	3		2.66667
		2	2	4	3	2	1	2	4	4	2	3	3		2.66667
		3	2	4	2	3	4	3	3	3	2	3	4		3
		4	2	3	2	2	2	4	4	2	3	4	4		3
		3	2	3	3	2	3	2	2	3	3	3	3		2.66667
		3	2	3	3	3	3	2	2	2	3	3	3		2.66667
		2	2	2	2	2	1	2	3	2	1	2	2		1.91667
		2	2	2	2	2	1	3	2	2	1	2	3		2
		CAMSAP2 siRNA
		1	3	1	1	2	1	1	2	2	1	2	3		1.66667
		1	3	2	2	2	2	2	3	0	2	2	3		2
		1	2	3	2	3	1	4	2	2	1	1	2		2
		1	3	2	3	3	1	1	2	2	3	1	2		2
		3	2	2	2	2	1	2	3	3	4	2	2		2.33333
		4	2	3	3	3	2	3	4	2	4	3	3		3
		2	2	2	1	1	2	2	2	3	3	2	2		2
		5	3	1	4	4	4	4	2	3	3	1	2		3
		4	4	2	3	6	5	3	4	1	2	3	3		3.33333
		2	4	4	4	4	5	3	3	3	3	3	2		3.33333
		4	5	3	2	5	6	3	5	3	3	5	4		4
		4	4	3	5	2	6	2	5	4	3	3	3		3.66667
		6	3	2	5	3	4	4	3	4	4	3	3		3.66667
		4	1	2	4	1	2	3	1	3	2	2	3		2.33333
		3	3	0	1	2	2	3	3	4	3	2	2		2.33333
		4	4	1	2	3	2	2	3	5	5	3	2		3
		3	2	3	0	2	3	3	4	4	4	2	2		2.66667
		4	2	3	4	3	2	3	4	4	3	2	2		3
		6	2	3	4	6	3	4	4	4	5	1	2		3.66667
		6	3	3	5	3	4	4	6	5	2	4	3		4
		5	4	4	4	4	5	5	6	5	3	3	4		4.33333
		5	2	4	3	2	6	5	5	4	3	2	3		3.66667
		5	2	4	2	3	4	7	6	3	4	1	3		3.66667
		4	4	2	3	7	3	3	5	3	3	1	2		3.33333
		1	5	4	4	4	4	5	4	2	3	2	2		3.33333
		1	5	5	6	6	5	4	2	3	3	2	2		3.66667
		4	6	5	5	6	6	5	4	6	4	5	4		5
		2	4	2	4	3	2	4	1	4	2	2	2		2.66667
		3	4	3	6	3	4	3	3	4	3	2	2		3.33333
		3	4	4	4	6	4	3	4	4	3	2	3		3.66667
		6	6	5	5	4	5	6	4	4	5	6	4		5
		4	6	3	4	4	5	5	5	5	2	4	5		4.33333
