# Supplementary material for: Control of endothelial cell polarity and sprouting angiogenesis by non-centrosomal microtubules
Source: eLife. 2018 Mar 16;7:e33864. doi: 10.7554/eLife.33864 (PMC5898915; doi:10.7554/eLife.33864)
Supplement: Figure 3—source data 1. [file elife-33864-fig3-data1.xlsx]

## Sheet: Figure 3B
Figure 3B
Inverse of circularity		CTL siRNA	CAMSAP2 siRNA
		28.5714	14.4928
		21.7391	41.6667
		40	22.7273
		27.8571	23.2558
		35.7143	23.8095
		41.6667	19.2308
		51.4286	38.4615
		62.5	52.6316
		20.4082	16.6667
		24.3902	23.8095
		40	41.6667
		16.3934	26.25
		29.7087	27.9048
		23.2558	27.7778
		29.0482	17.8571
		17.5439	29.4118
		28.7719	28.5714
		22.7273	28.8235
		25.7273	14.2857
		39.6749	47.619
		33.9956	28.1682
		38.6588
		29.6743

## Sheet: Figure 3C
Figure 3C		Protrusion number			Length of the longest protrusion
Protrusion parameters		(number per cell)			(µm)
(%)		CTL siRNA	CAMSAP2 siRNA		CTL siRNA	CAMSAP2 siRNA
		4	7		48.9208	23.3054
		5	5		46.3956	28.7703
		3	7		50.7183	20.5409
		4	2		34.7697	16.3518
		3	4		37.7795	18.3521
		2	7		59.0172	18.3098
		5	4		33.4742	35.0127
		4	4		16.7657	26.454
		2	4		47.0352	27.313
		4	4		32.9462	27.7505
		4	7		50.4883	24.3249
		5	5		52.1707	24.4295
		4	4		45.9039	42.4985
		4	6		48.5742	48.4638
		2	5		36.5242	28.9614
		4	6		63.8592	33.9114
		4	6		63.6993	51.9372
		4	3		56.1883	29.9202
		2	6		44.9111	25.523
		5	5		50.4049	22.738
		2	5		60.7557	32.6738
		4			70.2727
		3			48.7842

## Sheet: Figure 3D
Figure 3D
Polarity index		CTL siRNA	CAMSAP2 siRNA
		0.667695	0.410245
		0.583069	0.378738
		0.499611	0.381592
		0.681221	0.157673
		0.634977	0.404352
		0.394836	0.32249
		0.661153	0.484368
		0.421829	0.241091
		0.719987	0.404366
		0.71514	0.445183
		0.654735	0.263392
		0.728859	0.513115
		0.526739	0.45319
		0.655701	0.278584
		0.63733	0.5615
		0.737596	0.610155
		0.372955	0.138804
		0.637215	0.062332
		0.651788	0.364113
		0.570461	0.178644
		0.577682	0.105327
		0.708761
		0.307391

## Sheet: Figure 3F
Figure 3F	CTL siRNA														Mean
Protrusion persitence				9						6					7.5
(min)		16.032	14		14.312	12.332				18.336	16.338		18.336		15.6694
		26.02	11.06	25	22.338	26.312	16.37	18.312	18.33		21.936	19.596	19.974		20.4771
		19.01	0	11.076	16.978		10.136	10.064	11.136		12.796		10.336		12.6915
		13.018	14.15	12.54	11.578	14.978	11.374	11.746	16.236	11.378	24.836	14.036	10.076		13.8288
		25.018	24	28.16	27.79	31.792	16.396	24.872	31.794	23.964	18.312	24.594			25.1538
		25.372	19.026	17.324	24.312	16.186	23.886	19.174	21.082	21.784	33.784	15.788	16.936		21.2212
		20.556	22.022	16.93	16.778	24.996	21.62	23.178	19.864	22.312	19.498	18.238	15.086		20.0898
		45.044	14.346	17.676	13.4862	20.938	30.084	24.378	31.816	30.996	27.964	17.568	18.048		24.362
		23.772	10.786	20.162	19.092	16.914	21.332	27.806	16.926	15.798	19.356	15.868	23.966		19.3148
		23.776	13.582	26.296	26.996	39.788	17.184	21.306	27.706	17.566	11.588	26.996	21.894		22.8898
		166.704	9.22	27.782	35.868	70.764	58.506	36.048	128.406	72.104	58.084	84.086	58.184		67.1463
		130.108	71.666	23.108	18.984	43.178	43.13	66.104	78.844	138.044	104.084	80.9844	104.106		75.195
		94.398	55.412	82.792	69.376	87.386	57.144	52.104	96.048	121.13	108.928	100.876	97.84		85.2862
		132.378	95.024	101.856	125.188	106.126	68.09	107.004	114.438	119.316	127.42	117.264	104.088		109.849
		123.734	54.604	125.336	109.924	118.048	65.184	97.076	97.13	70.804	91.85	125.304	131.866		100.905
		156.334	96.51	130.052	135.984	139.188	106.044	74.066	176.084	112.049	117.664	137.906	149.888		127.647
		159.644	108.012	96.79	147.006	106.09	84.108	88.876	142.848	131.296	135.276	127.726	121.85		120.794
		171.03	157.018	177.03	186.984	162.588	159.844	158.964	186.813	188.068	144.916	178.085	155.91		168.937
		194.526	157.018	188.728	163.184	145.18	171.95	167.122	251.914	210.044	204.046	186.106	106.122		178.828
		248.37	108.078	172.698	129.184	97.204	78.044	116.504	273.332	231.066	264.884	253.526	145.196		176.507
		248.37	135.034	203.39	149.096	167.156	160.846	110.418	285.89	201.084	264.886	234.164	187.516		195.654
		237.692	145.27	180.468	189.206	137.188	164.104	159.646	238.068	219.126	236.456	161.686	176.642		187.129
		243.374	145.27	229.15	185.026	163.01	124.07	148.086	272.108	250.732	275.006	231.268	189.21		204.692
		344.038	144.056	164.41	166.41	181.846	117.864	217	265.06	258.956	273.024	245.844	235.016		217.794
		344.038	206.034	128.52	168.764	189.188	168.044	229.192		251.968	282.044	259.288	253.006		225.462
		243.028	206.034	130.794	207.008	209.91	171.39	195.166	181.968	192.05	179.138	195.306	205.306		193.091
		200.272	206.034	196.034	207.896	225.128	230.916	158.046	225.016	166.864	199.848	178.987	224.516		201.63
		239.776	206.034	209.012	210.758	315.888	217.066	236.912	204.648	214.588	213.196	188.064	157.568		217.793
		239.776	206.034	191.712	210.758	287.94	165.178	236.912	204.648	255.886	213.196	219.886	157.568		215.791
		344.038	206.034	233.47	203.568	349.132	249.568	236.912	264.108	255.886	244.778	224.746	299.664		259.325
		156.532	206.034	233.47	203.568	218.936	249.568	114.046	167.066	255.886	244.778	224.746	114.372		199.083
	CAMSAP2 siRNA
		20	31.572	30.062	31.306	16.396	39.664	15.806	33.578	25.966	25.126	18.608	35.664		26.979
		10	36.704	82.53	40.396	22.978	45.07	54.846	41.084	42.93	56.104	38.612	50.956		43.5175
		10	36.586	47.746	37.286	18.704	32.696	17.304	23.442	48.086	18.772	36.124	48.134		31.24
		29	30.73	68.61	59.968	39.868	53.884	35.844	59.844	47.864	35.868	49.066	31.67		45.1847
		16.3333	32.81	79.114	35.848	43.41	31.576	19.356	42.68	71.806	51.568	39.96	50.936		42.9498
		22.588	34.07	36.756	45.846	37.1	29.952	17.962	38.87	55.566	47.538	29.966	59.724		37.9948
		43.09	37.59	26.218	43.92	38.096	50.978	30.978	33.156	34.078	30.928	17.386	39.978		35.533
		34.426	20.344	15	32.068	24.918	33.866	18.778	29.988	17.886	15.846	15.788	22.822		23.4775
		38.754	34.41	16.514	76.788	39.868	23.566	33.584	39.466	15.236	15.128	12.91	17.868		30.341
		50.522	43.396	27.29	63.876	62.806	57.946	23.786	59.732	22.244	18.976	34.086	28.312		41.081
		44.776	36.424	32.344	49.886	33.908	43.816	49.806	42.872	21.288	39.88	31.506	23.964		37.5392
		49.096	43.718	47.792	75.664	29.624	35.314	80.312	37.646	25.536	41.79	39.526	49.908		46.3272
		66.08	30.466	37.126	43.884	23.864	31.866	47.138	109.566	18.086	34.86	47.684	40.368		44.249
		74.35	22.204	34.794	61.366	23.524	57.786	52.966	71.864	25.568	24.764	41.522	37.51		44.0182
		70.25	28.026		22.978	29.346	24.822	42.912	48.068	17.578	23.528	25.864	28.948		32.9382
		100.036	32.718	54.098	55.842	53.624	92.064	59.31	59.846	33.788	49.966	35.378	39.35		55.5017
		83.334	31.126	28.736		57.824	58.606	47.132	40.87	29.286	49.288	47.466	51.886		47.7776
		130.412	33.176	60.752	80.984	60.698	94.966	48.046	53.134	40.262	58.532	63.744	55.966		65.056
		73.424	15.432	46.676	50.406	25.862	47.478	59.746	42.672	47.774	39.566	43.746	49.78		45.2135
		106.944	18.426	49.71	45.644	38.13	65.526	68.468	75.668	41.526	29.13	39.966	53.566		52.7253
		84.042	20.318	43.542	38.986	31.842	52.764	52.466	60.042	63.344	55.87	43.134	47.788		49.5115
		96.624	19.338	50.098	86.71	45.302	39.366	32.986	70.978	58.108	50.58	67.688	37.81		54.6323
		91.064	16.5	47.108	22.316	39.57	59.846	39.774	63.524	49.478	73.562	59.344	50.534		51.0517
		61.084	33.812	75.564	54.906	57.688	93.492	53.562	49.864	59.566	48.874	62.932	31.966		56.9425
		142.056	65.624	76.502	79.846	70.748	90.244	53.578	74.91	69.128	63.568	79.966	63.46		77.4692
		80.1	70.124	49.082	69.358	48.982	84.266	68.91	50.694	89.55	77.346	49.968	59.708		66.5073
		35.972	64.398	63.382	63.846	54.162	69.566	36.684	63.092	69.788	53.806	51.744	28.186		54.5522
		49.036	55.084	59.234	34.556	30.218	65.89	50.696	51.692	93.886	46.936	60.066	59.566		54.7383
		64.672	68.094	65.128	69.522	62.658	77.65	47.364	55.786	57.846	51.784	95.642	57.586		64.4777
		66.104	45.05	48.448	55.824	47.842	43.794	59.126	68.698	50.294	48.068	59.748	39.646		52.7202
		31.588	40.17	35.72	37.524	37.684	40.664	43.668	65.168	37.532	31.784	28.954	35.786		38.8535
		30.29	30.588	60.196	59.864	29.882	38.178	36.932	51.806	19.346	23.538	43.966	59.032		40.3015

## Sheet: Figure 3G
Figure 3G		CTL siRNA	CAMSAP2 siRNA
α-tubulin enrichment in the longest protrusion		1.54115	1.94429
(fold enrichment)		1.10102	1.12582
		0.983033	1.27427
		1.34528	1.05527
		2.17068	1.14223
		1.0349	1.29457
		1.9854	0.905136
		1.30606	0.769342
		2.4407	1.87915
		1.32914	0.862431
		2.70768	1.63251
		0.635997	1.26088
		2.00453	0.961972
		1.06767	1.08721
		1.29675	0.42536
		2.4769	1.02118
		0.940995	1.2407
		1.18996	0.606007
