# Supplementary material for: Control of endothelial cell polarity and sprouting angiogenesis by non-centrosomal microtubules
Source: eLife. 2018 Mar 16;7:e33864. doi: 10.7554/eLife.33864 (PMC5898915; doi:10.7554/eLife.33864)
Supplement: Figure 4—figure supplement 1—source data 1. [file elife-33864-fig4-figsupp1-data1.xlsx]

## Sheet: Figure 4 Figure Supplement 1A
Figure 4 Figure Supplement 1A		Lamellipodia width			Lamellipodia coverage			Stress fiber cumulative length			Stress fiber width
Factin parameters		(μm)			(% of the leading edge)			(μm/μm2 of cell area)			(μm)
		CTL siRNA	CAMSAP2 siRNA		CTL siRNA	CAMSAP2 siRNA		CTL siRNA	CAMSAP2 siRNA		CTL siRNA	CAMSAP2 siRNA
		1.1604	2.382		23.46	70.5432		0.710485	0.583559		0.16634	0.153209
		3.56	1.9435		40.4939	66.6216		0.594388	0.841576		0.159887	0.158109
		1.3464	2.411		33.4963	85.3691		0.632633	0.621668		0.162805	0.156354
		1.48873	2.03438		64.022	92.0936		0.983814	0.66445		0.156675	0.162731
		1.45683	2.04025		27.3579	49.5489		0.728713	0.980585		0.157795	0.16537
		2.01943	1.65088		62.0251	55.5765		0.659239	0.865014		0.158872	0.160623
		1.63473	2.819		45.8064	47.9779		0.436373	0.566175		0.163364	0.151136
		1.6764	2.329		34.9554	85.4224		0.223705	0.546207		0.187959	0.152832
		1.7542	2.0278		40.9003	82.679		0.262721	0.457774		0.1831	0.151244
		1.796	2.38267		58.8101	67.326		0.298536	0.68414		0.165078	0.154248
		1.86117	2.4083		48.2268	55.2918		0.493843	0.688492		0.169669	0.152631
		1.84475	2.0373		41.9654	50.7204		0.638114	0.520863		0.170866	0.154027
		1.72483	2.38767		40.9382	49.9593		0.588153	0.714296		0.175126	0.154169
		1.9	2.04367		61.9761	65.1185		0.464108	0.818774		0.187997	0.15736
		2.17	2.59888		72.925	70.3456		0.727039	0.791728		0.16242	0.155618
		1.67962	2.58855		51.7723	88.7518		0.71918	0.755381		0.161987	0.154449
		1.25467	2.427		23.6737	57.6219		0.661692	0.894212		0.167409	0.15285
		2.7248	3.156		67.1402	90.2022		0.328092	0.668036		0.154608	0.147759
		3.0761	2.54511		85.638	66.6703		0.811599	0.428962		0.157413	0.155157
		2.14763	2.1992		44.4669	83.0326		0.660131	0.72563		0.153873	0.150837
		2.275	2.22225		97.2928	92.1566		0.287521	0.73761		0.149641	0.161518
		2.51429	1.7276		66.2297	48.9628		0.59343	0.592348		0.158235	0.154296
		1.91667	2.60614		75.6516	41.5922		0.295029	0.545335		0.149932	0.157183
		2.06322	2.7168		85.4578	59.1248		0.889035	0.667612		0.156921	0.15351
		2.03289	1.7904		48.3911	50.4429		0.673665	0.512047		0.147216	0.151778
		2.05037	1.41975		74.6347	20.532		0.615372	0.642095		0.148594	0.156722
		2.4755	2.5282		59.1933	51.2402		0.538011	0.841703		0.147117	0.177207
		2.65808	1.7404		73.808	53.3311		0.567001	0.626448		0.147807	0.156046
		2.81567	1.434		83.8129	24.8147		0.522527	0.624062		0.153872	0.172287
		2.22271	1.16129		64.5435	50.7438		0.517645	0.732884		0.148686	0.177682

## Sheet: Figure 4 Figure Supplement 1B
Figure 4 Figure Supplement 1B		Rho			Rac1
RhoGTPase activation		CTL siRNA	CAMSAP2 siRNA		CTL siRNA	CAMSAP2 siRNA
%		0.73	0.722		0.573	0.604
		0.564	0.711		0.604	0.57
		0.812	0.726		0.627	0.64
		0.828	0.702		0.578	0.576
		0.777	0.709		0.573	0.546
		0.621	0.731		0.545	0.578
		0.86	0.65		0.57	0.592
		0.868	0.789		0.587	0.632
		0.743	0.625		0.595	0.625
		0.733	0.875		0.57	0.599
		0.738	0.794		0.58	0.597
		0.848	0.773		0.577	0.616
		0.723	0.797		0.572	0.6
		0.732	0.849		0.61	0.598
		0.687	0.845		0.608	0.588
		0.771	0.807		0.579	0.632
		0.768	0.842		0.551	0.618
		0.832	0.648		0.587	0.576
		0.727	0.745		0.561	0.583
		0.759	0.791		0.598	0.593
		0.845	0.698		0.631	0.593
		0.864	0.695		0.6	0.582
		0.86	0.745		0.585	0.521
		0.699	0.672		0.567	0.56
		0.717	0.678

## Sheet: Figure 4 Figure Supplement 1C
Figure 1 - Figure Supplement 1C		VE-Cadherin			ZO-1
Cell-cell junction parameters		Maximum intensity			Maximum intensity
		(103 a.u.)			(103 a.u.)
		CTL siRNA	CAMSAP2 siRNA		CTL siRNA	CAMSAP2 siRNA
		7642.5	7808.7		4998.21	6185.2
		8060.32	5019.48		4913.36	6827.94
		8570.18	6597.65		5674.8	6292.91
		7011.11	8170.27		5676.54	5120.22
		5137.04	8708.82		7344.1	4668
		Peak area			Peak area
		(103 a.u.)			(103 a.u.)
		CTL siRNA	CAMSAP2 siRNA		CTL siRNA	CAMSAP2 siRNA
		75059.8	83726.5		58895	53884
		76708.1	80899.9		51835	58613.6
		91457.5	78984		50308.6	54019.1
		66699.2	67499.7		57175.9	59077.7
		69491.1	77752.9		57591	53572.7
									0

## Sheet: Figure 4 Figure Supplement 1D
Figure 4 Figure Supplement 1D
Phalloindin intensity peak area		CTL siRNA	CAMSAP2 siRNA
(a.u.)		127	63.305
		102.282	68.31
		79.43	96.185
		90.6967	76.8
		118.607	76.03
		92.74	69.79
		56.5033	95.735
		75.45	70.9767
		104.865	105.38
		142.4	128.867
		89.96	87.56
		177.88	95.7
		112.72	117.31
		81.08	159.813
		155.12	186.848
		195.34	164.6
		217.32	107.06
		182.6	122.04
		121.08	211.333
		150.52	149.11
		95.905	91.025
		127.633	130.525
		116.09	149.033
		138.333	97.922
		142.65	111.062
		88.43	79.8425
		50.92	121.39
		89.14	57.855
		144.55	132.967
		83.03	74.19
		119.1	79.12
		62.51	78.2967
		76.86	90.39
		49.22	52.78
		119.29	66.505
		98.225	111.887
		91.45	123.073
		83	65.7675
		137.533	81.09
		126.2	114.5
