# Supplementary material for: Control of endothelial cell polarity and sprouting angiogenesis by non-centrosomal microtubules
Source: eLife. 2018 Mar 16;7:e33864. doi: 10.7554/eLife.33864 (PMC5898915; doi:10.7554/eLife.33864)
Supplement: Figure 4—figure supplement 2—source data 1. [file elife-33864-fig4-figsupp2-data1.xlsx]

## Sheet: Figure 4 Figure Supplement 2B
Figure 4 Figure Supplement 2B
Total protrusion length		CTL siRNA	CTL siRNA	CTL siRNA	CAMSAP2 siRNA	CAMSAP2 siRNA	CAMSAP2 siRNA
(μm)		Non treated	Y27632	Blebbistatin	Non treated	Y27632	Blebbistatin
		70.489	124.783	196.208	145.309	110.597	112.315
		83.2744	101.846	95.6035	90.4243	177.874	116.714
		89.664	151.64	146.505	77.8033	111.358	136.071
		94.177	116.635	88.9	107.596	84.1415	73.7027
		66.7985	178.466	57.5543	120.028	117.54	118.756
		86.949	130.962	101.472	140.133	128.09	84.5122
		70.3387	114.736	156.201	111.117	128.739	96.1903
		51.877	83.5843	47.5358	81.2772	139.791	144.772
		71.0557	98.7232	72.0978	88.6581	122.16	157.708
		65.8571	75.6415	167.804	73.5486	99.0328	158.909
		68.4062	112.551	89.5585	90.4083	98.3194	147.577
		48.5885	145.875	69.4087	111.671	184.835	185.741
		96.4189	120.012	101.665	108.122	116.917	78.8222
		39.7622	85.5481	141.442	87.4696	151.245	176.982
		97.0696	83.2515	139.038	89.2822	137.987	48.5072
		81.5638	106.362	105.966	86.1944	118.119	89.201
		81.3836	109.992	101.082	84.1077	147.962	66.3847
		61.9697	98.4266	104.941	73.8262	112.721	154.381
		63.1491	142.391	161.512	88.666	74.4743	111.199
		70.2935	141.051	107.713	77.71	162.937	97.1623
		74.0832	105.934		87.5867	120.335
		76.9042	111.159		88.6369	144.31
		74.6487	60.8581		53.8042	106.704
		146.766	74.4668		50.2591	75.7211
		130.674	45.3851		39.8786	72.748
		104.199	76.5959		50.829	85.003

## Sheet: Figure 4 Figure Supplement 2C
Figure 4 Figure Supplement 2C
Longest protrusion length		CTL siRNA	CTL siRNA	CTL siRNA	CAMSAP2 siRNA	CAMSAP2 siRNA	CAMSAP2 siRNA
(μm)		Non treated	Y27632	Blebbistatin	Non treated	Y27632	Blebbistatin
		35.4835	47.873	91.1308	42.5696	37.2323	35.0035
		41.7413	49.0725	74.852	29.1963	65.9575	28.8292
		52.8378	54.8233	89.6915	24.4762	37.0262	48.894
		47.256	57.8999	59.0048	32.2808	31.3719	22.684
		39.2076	74.0217	33.7833	30.21	33.3213	60.879
		41.0062	64.373	53.321	27.2803	42.7082	42.3615
		48.9876	55.4774	68.7977	35.6383	40.2203	32.0673
		27.4129	44.9233	36.0112	32.4449	40.7031	55.5973
		35.7123	47.6032	52.8218	25.3252	43.846	46.1912
		33.7245	34.9984	53.6707	25.6295	26.1215	45.7452
		36.2886	40.6136	44.6795	28.0957	35.7649	35.1442
		29.7626	44.5152	32.7758	34.5403	52.6262	57.2893
		35.9701	44.2142	55.9117	32.5628	41.9649	33.1097
		39.7622	52.6611	44.9695	30.2066	29.1806	75.6257
		42.565	52.5835	48.13	28.5316	43.4791	28.251
		42.421	39.3454	40.4922	25.0578	29.0022	42.107
		31.0248	48.5339	52.4173	26.2163	40.0703	28.751
		28.6929	59.3246	62.282	25.956	34.6158	45.607
		36.2544	53.2314	48.18	27.6686	27.4638	37.9293
		35.2287	42.4486	28.5538	22.8321	42.5274	25.2387
		28.0993	68.1639		34.4887	49.0162
		36.6929	38.5379		25.7441	25.3984
		37.399	41.9791		31.321	25.5178
		39.6111	71.5573		28.004	33.632
		52.7054	71.7093		32.5643	45.5203
		39.7782	88.154		39.1977	50.671

## Sheet: Figure 4 Figure Supplement 2D
Figure 4 Figure Supplement 2D
Average protrusion length		CTL siRNA	CTL siRNA	CTL siRNA	CAMSAP2 siRNA	CAMSAP2 siRNA	CAMSAP2 siRNA
(μm)		Non treated	Y27632	Blebbistatin	Non treated	Y27632	Blebbistatin
		35.2445	24.9566	58.6525	29.0618	27.6493	28.0788
		27.7581	33.9487	47.8017	22.6061	43.5623	19.4523
		29.888	37.9101	48.8351	19.4508	22.2717	34.0179
		31.3923	38.8782	29.6333	21.5193	21.0354	18.4257
		33.3993	44.6165	19.1848	20.0047	29.3849	39.5854
		21.7373	43.6541	25.3679	23.3555	32.0224	28.1708
		23.4462	28.6839	39.0501	22.2233	32.1847	24.0476
		25.9385	27.8614	23.7679	27.0924	34.9478	36.1931
		23.6852	32.9077	36.0489	17.7316	30.5401	31.5417
		21.9524	25.2138	41.9511	18.3872	19.8066	31.7817
		22.8021	28.1378	22.3896	22.6021	32.7731	24.5961
		24.2942	29.175	23.1363	27.9176	39.1559	46.4352
		24.1047	30.0031	33.8882	27.0305	41.9649	39.4111
		39.7622	28.516	23.5737	21.8674	29.1806	44.2455
		32.3565	27.7505	34.7596	22.3206	43.4791	16.1691
		27.1879	35.4541	26.4916	17.2389	29.0022	29.7337
		20.3459	36.6638	33.6938	16.8215	40.0703	22.1283
		12.3939	32.8089	34.9802	18.4566	34.6158	30.8761
		12.6298	35.5979	32.3025	22.1665	27.4638	27.7998
		17.5734	23.5084	26.9282	19.4275	42.5274	19.4324
		18.5208	35.3115		29.1956	30.0839
		38.4521	27.7899		29.5456	24.0518
		37.399	40.4911		26.8484	21.3409
		24.51	49.5454		25.0794	30.228
		32.7338	45.2945		26.5327	48.4019
		26.1018	38.2979		33.8183	42.4167

## Sheet: Figure 4 Figure Supplement 2E
Figure 4 Figure Supplement 2E
Protrusion number		CTL siRNA	CTL siRNA	CTL siRNA	CAMSAP2 siRNA	CAMSAP2 siRNA	CAMSAP2 siRNA
(number per cell)		Non treated	Y27632	Blebbistatin	Non treated	Y27632	Blebbistatin
		2	5	3	5	4	4
		3	3	2	4	6	6
		3	4	3	4	5	4
		3	3	3	5	4	4
		2	4	3	6	4	3
		4	3	4	6	4	6
		3	4	4	5	4	4
		2	3	2	3	4	4
		3	3	2	5	4	5
		3	3	4	4	5	5
		3	4	4	4	3	6
		2	5	3	4	6	4
		4	4	3	4	5	2
		1	3	6	4	7	4
		3	3	4	4	5	3
		3	3	4	5	6	3
		4	3	3	5	7	6
		5	3	3	4	6	5
		5	4	5	4	4	4
		4	6	4	4	6	5
		4	3		3	4
		2	4		3	6
		1	3		4	5
		3	3		4	5
		2	2		3	3
		2	2		3	4

## Sheet: Figure 4 Figure Supplement 2F
Figure 4 Figure Supplement 2F		Sprout number							Sprout length
Sprout parameters		(number per spheroid)							(μm)
		CTL siRNA	CTL siRNA	CTL siRNA	CAMSAP2 siRNA	CAMSAP2 siRNA	CAMSAP2 siRNA		CTL siRNA	CTL siRNA	CTL siRNA	CAMSAP2 siRNA	CAMSAP2 siRNA	CAMSAP2 siRNA
		Non treated	Y27632	Blebbistatin	Non treated	Y27632	Blebbistatin		Non treated	Y27632	Blebbistatin	Non treated	Y27632	Blebbistatin
		27	36	28	10	11	15		54.9634	58.1798	55.9133	22.2213	19.548	24.852
		38	25	42	7	11	11		59.5637	80.488	68.0132	20.2263	25.2407	20.6816
		30	26	29	7	10	10		56.5316	56.183	69.7355	16.1582	16.9488	21.5779
		30	30	28	7	11	17		56.5316	63.1848	70.849	16.3749	23.9323	19.874
		25	31	29	8	9	13		65.147	73.5699	77.1729	24.0729	20.0983	26.4674
		24	32	36	8	9	16		43.7295	58.7041	57.2034	26.4096	18.6966	21.4187
		26	30	29	7	14	12		63.0363	54.613	62.2106	20.4913	24.5616	19.1153
		28	33	35	10	9	12		68.6519	65.5053	55.0156	17.4786	25.5858	24.1684
		28	31	33	8	13	14		69.6389	84.1649	56.9186	16.09	24.371	28.1164
		25	34	37	11	10	8		53.8337	82.7502	56.032	37.5835	21.966	23.9976
		35	32	34	11	12	17		57.6731	73.8412	83.203	22.9272	19.6817	20.1581
		28	29	35	9	13	9		56.7445	79.2204	54.0596	17.1631	26.3426	31.9185
		31	33	35	9	11	6		60.08	74.746	84.6477	23.9188	29.5354	22.012
		26	33	38	11	10	9		61.3772	52.7488	54.9225	19.1397	22.7394	28.6892
		25	31	37	8	11	11		62.9291	71.9618	85.8454	25.4387	21.534	27.6596
		32	32	31	11	11	11		57.2936	72.0192	52.3611	17.0628	25.1552	26.5436
		34	30	32	9	12	12		60.8071	62.7799	49.6705	12.4391	25.1597	30.0478
		31	35	32	12	10	11		65.3478	68.3196	56.4293	16.2807	24.8509	20.2478
		30	34	33	10	13	10		59.0974	76.3645	56.385	19.102	23.0689	29.0742
		27	31	31	9	16	11		38.5457	78.5183	93.0877	22.2018	25.1702	28.9488
		30	36	30	9	13	12		61.9115	77.9132	52.1803	22.8187	21.9644	28.2896
		30	27	31	9	8	11		57.6145	79.4292	58.1502	21.8059	24.2712	26.1619
		29	31	37	13	11	8		62.3997	85.071	55.5661	16.3426	30.6306	26.2837
		24	29	35	8	10	14		50.0898	72.7284	55.1336	18.3715	31.9834	26.2396
		23	32	36	9	11	11		64.1988	64.9942	70.7936	14.166	31.2682	19.5614
		24	29	34	9	11	11		51.9313	60.5951	58.9522	22.0578	30.6765	25.5416
		31	29	33	9	11	15		42.9512	64.3034	59.5824	19.2962	32.6441	22.7997
		29	30	32	8	11	11		54.0023	73.4252	60.0315	26.8504	22.2962	24.4447
		34	29	30	8	14	8		54.7168	62.6934	55.3137	24.8344	24.0442	17.7537
		29	30	35	13	11	11		64.3928	75.5635	50.5197	19.8806	25.3766	21.9384
		26	31	36	8	14	8		67.2333	76.7699	52.9097	17.0923	26.0888	20.8604
		21	27	32	9	9	15		38.0381	77.3713	59.2083	19.528	19.464	20.9141
		24	28	28	10	10	10		51.0683	58.9939	57.1465	22.1432	18.623	21.3756
		26	27	29	8	9	7		36.0558	59.8975	50.8166	26.6046	28.6701	23.398
		28	29	28	11	12	9		48.6844	59.4748	51.4064	18.0205	19.1516	16.6271
		22	29	25	10	12	7		49.7143	54.8882	93.1052	21.1055	21.2446	25.818
		25	25	29	5	15	9		41.9978	59.971	81.1409	19.7531	24.7742	25.6247
		27	27	27	6	10	8		55.6697	64.4423	58.4219	22.3695	20.2432	25.3502
		27	26	30	8	6	10		51.9509	62.0748	53.433	19.5506	29.6724	18.7859
		32	28	30	7	8	10		47.1825	71.5069	52.5302	16.1798	30.8154	21.5588
		28	31	27	8	8	10		56.7806	96.2355	54.7053	19.8394	26.4749	20.4282
		31	30	29	8	9	12		53.1099	71.1047	50.3605	17.9571	18.5077	24.1053
		19	24	26	11	9	9		48.0436	52.8613	93.0102	16.7251	22.8412	20.6326
			26	23	9	13	6			47.8868	56.8278	24.4003	20.1906	22.2198
			31	29	6	7	9			54.5203	74.6775	21.264	18.6038	20.8274
				27	7	10	11				68.3089	23.8455	23.7523	19.7675
				31	8	10	9				68.0891	23.1561	23.5195	20.3433
					7	10	9					19.7853	25.1846	21.763
					9	10	11					23.3364	19.288	22.5844
					6	12	10					20.5446	23.8026	21.9133
					6	11	6					17.9109	29.1768	19.9574
					5		8					18.4595		20.5285
					9		9					26.7026		14.4117
					7		10					24.4081		24.6762
