# Supplementary material for: Control of endothelial cell polarity and sprouting angiogenesis by non-centrosomal microtubules
Source: eLife. 2018 Mar 16;7:e33864. doi: 10.7554/eLife.33864 (PMC5898915; doi:10.7554/eLife.33864)
Supplement: Figure 4—source data 1. [file elife-33864-fig4-data1.xlsx]

## Sheet: Figure 4A
Figure 4A
Phalloidin intensity		CTL siRNA	CAMSAP2 siRNA
(a.u.)		149.924	68.4288
		166.172	89.6765
		128.236	97.8902
		103.905	112.659
		117.592	134.084
		118.044	132.644
		71.597	116.486
		50.32	124.506
		45.868	122.032
		39.18	113.48
		87.233	107.597
		76.969	109.065
		100.646	100.88
		101.002	121.513
		111.712	114.332
		97.973	129.596
		72.299	116.541
		65.367	77.7379
		72.472	95.1091
		70.28	106.66
		56.296	108.557
		99.284	106.767
		84.61	92.1158
		122.193	118.763
		97.049	72.1411
		79.758	115.958
		78.433	54.1181
		84.929	119.943
		121.886	100.288
		106.943	87.1843

## Sheet: Figure 4C
Figure 4C
Phalloidin intensity		CTL siRNA	CAMSAP2 siRNA
(a.u.)		127	63.305
		102.282	68.31
		79.43	96.185
		90.6967	76.8
		118.607	76.03
		92.74	69.79
		56.5033	95.735
		75.45	70.9767
		104.865	105.38
		142.4	128.867
		89.96	87.56
		177.88	95.7
		112.72	117.31
		81.08	159.813
		155.12	186.848
		195.34	164.6
		217.32	107.06
		182.6	122.04
		121.08	211.333
		150.52	149.11
		95.905	91.025
		127.633	130.525
		116.09	149.033
		138.333	97.922
		142.65	111.062
		88.43	79.8425
		50.92	121.39
		89.14	57.855
		144.55	132.967
		83.03	74.19
		119.1	79.12
		62.51	78.2967
		76.86	90.39
		49.22	52.78
		119.29	66.505
		98.225	111.887
		91.45	123.073
		83	65.7675
		137.533	81.09
		126.2	114.5

## Sheet: Figure 4D
Figure 4D
Polarity index		CTL siRNA	CTL siRNA	CTL siRNA	CAMSAP2 siRNA	CAMSAP2 siRNA	CAMSAP2 siRNA
		Non treated	Y27632	Blebbistatin	Non treated	Y27632	Blebbistatin
		0.959851	0.249779	0.338847	0.320807	0.311151	0.38576
		0.68026	0.325716	0.718144	0.452763	0.408682	0.266769
		0.446657	0.312818	0.607466	0.326877	0.380063	0.385437
		0.421207	0.588133	0.347698	0.158913	0.307173	0.491708
		0.967421	0.55633	0.416063	0.349881	0.459694	0.453141
		0.386752	0.480043	0.59736	0.458729	0.435398	0.0386831
		0.482295	0.286513	0.345057	0.274859	0.253839	0.300027
		0.875654	0.611661	0.535405	0.301245	0.40389	0.280971
		0.222587	0.362812	0.578125	0.247389	0.292514	0.221806
		0.332149	0.402504	0.747752	0.328836	0.310196	0.377679
		0.491492	0.437293	0.447812	0.115502	0.12228	0.167155
		0.783475	0.786141	0.431672	0.684227	0.184947	0.199515
		0.593268	0.516957	0.328293	0.675364	0.250151	0.66279
		1	0.693693	0.430226	0.400802	0.276822	0.238239
		0.346385	0.372435	0.581862	0.102563	0.225647	0.0252447
		0.47538	0.578603	0.586599	0.27677	0.473376	0.408681
		0.407025	0.354211	0.718329	0.328367	0.259855	0.590564
		0.553895	0.383555	0.782647	0.386536	0.496697	0.513989
		0.265966	0.75921	0.511133	0.264019	0.267397	0.176212
		0.536815	0.416415	0.72486	0.196967	0.231709	0.266387
		0.300009	0.491916		0.292581	0.554629
		0.588661	0.462428		0.328578	0.323834
		1	0.380662		0.411949	0.225938
		0.793341	0.525707		0.37983	0.242921
		0.268932	0.648142		0.264402	0.231064
		0.918757	0.361313		0.207031	0.313283

## Sheet: Figure 4E
Figure 4E	CTL siRNA														Mean		CTL siRNA														Mean
Protrusion persitence	Non treated	5.582		7.835	25.536					6.883	18.054	11.624	11.039		12.3647		Y27632	40.922		9.9825	7.349	5.17	37.5783		16.751	4.315	15.481		13.7595		16.812
(min)		5.598	10.968	7.835	25.536			3.462	12.459	6.883	18.054	11.624	11.039		11.3458			37.1823	6.473	13.525	31.346	54.549	37.5783	17.627	16.751	26.0495	15.481		13.7595		24.5747
		3.7025	10.968			9.017	39.334	6.011	12.459	12.03	18.054	19.326			14.5446			37.1823	5.938	79.233	31.346	54.549	36.1023	22.9868	16.751	26.0495	15.481		4.8		30.0381
			15.035	27.701		12.053	39.334	6.011		12.03	21.078	16.1175	5.17		17.1699			44.7795		73.43	31.346	54.549	36.1023	22.9868	67.262	48.211	38.273	6.87	6.0855		39.0814
			15.035	27.701		12.304	39.334		15.044	3.435	21.078	16.1175			18.7561			38.425	20.3388	73.43	31.346	47.5783	47.8875	16.4633	67.262	48.211	38.273	6.923	6.0855		36.852
		6.455	15.7845	19.013	40.8185	14.5065	12.9437	16.456	15.044		21.078	24.904	19.554		18.7779			54.5637	20.3388	105.654	16.7775	47.5783	59.6905	16.4633	67.262	48.211	141.508		31.799		55.4406
		8.415	18.355	16.7853	40.8185	12.564	12.9437	16.456	15.044		9.898	15.927	19.554		16.9782			56.677	257.023	176.477	16.7775	47.5783	69.621	26.2	67.262	48.211	141.508	27.628	31.799		80.5635
		10.4677	18.355	23.8545	25.794	6.473	12.9437	14.0435	12.6237	5.17	9.898	15.927	21.4087		14.7466			56.677	257.023	176.477	20.627	37.2187	69.621	26.192	53.6945		141.508	104.627	31.799		88.6786
		13.032	28.982	27.3513	16.9655		14.8315	14.0435	21.9423	5.17	44.4395	22.637	21.4087		20.9821			56.677	257.023	193.539		49.3825	164.88	117.218	69.206		141.508	106.403	116.801		127.264
		12.022		27.3513	16.9655	107.234	28.345	6.87	21.9423	10.805	31.148	30.773	112.935		36.9447			43.953	257.023	193.539	106.482	33.3235	115.567	93.961	94.2445		141.508	106.403	116.801		118.437
		19.6515		29.738	18.115	107.234	28.345		33.93	10.805	31.148	30.773	112.935		42.2675			43.953	176.813	193.539	106.482	33.3235	73.8088	93.961	94.2445	198.795	141.508	147.916	233.182		128.127
		19.291	14.227	32.852	18.079	107.234	23.266		33.93	11.593	54.144	42.0278	148.138		45.8893			68.781	121.959	137.408	128.184	106.631	73.8088	93.961	94.2445	107.34	141.508	147.916	233.182		121.244
		78.8875	14.227	32.852	12.881	92.3147	23.266	9.017	76.4727	32.643	54.144	42.0278	148.138		51.4059			41.27	170.994	137.408	128.184	95.325	156.52	78.3795	94.2445	107.34	171.315	136.969	186.792		125.395
		79.2337	16.757	32.852	4.315	92.3147	17.145	9.017	76.4727	32.643	114.457	46.607	148.138		55.8293			41.27	170.994	137.408	124.244	95.325	156.52	78.3795	74.9342	107.34	116.647	136.969	186.792		118.902
		112.073	16.757	51.526	17.687	86.8017	13.8835	9.098	171.123	29.2095	114.457	46.607	148.138		68.1134			41.27	170.994	192.607	130.98	141.551	150.922	78.3795	74.9342	75.4263	171.315	153.478	186.792		130.721
		111.927	98.8835	69.583	12.909	86.8017	156.555	13.74	87.4433	29.2095	114.457	46.607	148.138		81.3544			125.598	153.062	131.459	130.98	141.551	150.922	105.438	55.1067	75.4263	171.315	153.478	128.393		126.894
		111.927	98.8835	102.404	60.545	86.8017	109.301	97.25	118.81	50.567	123.889	67.3385	148.138		97.9879			89.0028	153.062	187.76	134.392	97.5273	94.4768	105.438	105.67	140.303	171.315	149.422	122.484		129.238
		184.197	98.8835	102.404	82.8703	93.6022	109.301	97.25	118.81	107.622	123.889	60.5608	186.784		113.848			103.704	123.012	187.76	134.392	97.5273	94.4768	123.67	105.67	140.303	171.315	149.422	122.484		129.478
		151.828	66.9863	102.404	64.8718	93.6022	109.301	97.25	169.846	107.622	130.564	60.5608	186.784		111.802			93.4084	123.012	168.752	134.392	97.5273	94.4768	123.67	105.67	140.303	171.315	149.422	122.484		127.036
		86.7602	98.393	102.404	74.9338	69.1333	157.173	97.25	169.846	69.256	130.564	60.5608	186.784		108.588			93.4084	89.159	168.752	134.392	111.176	94.4768	123.67	137.877	140.303	115.66	149.422	122.484		123.398
		184.625	98.393	102.404	74.9338	124.36	157.173	97.25	119.957	141.835	130.564	66.166	186.784		123.704			90.3292	119.059	168.752	134.392	111.176	100.071	126.93	137.877	140.303	124.963	103.96	124.947		123.563
		184.625	117.226	102.404	74.9338	65.4987	157.173	97.25	119.957	141.835	130.564	95.9625	186.784		122.851			90.3292	119.059	168.752	134.392	111.176	100.071	126.93	111.727	140.303	124.963	103.96	124.947		121.384
		184.625	117.226	141.045	102.631	65.4987	157.173	120.881	119.957	141.835	143.666	181.62	186.784		138.578			87.2136	130.967	170.047	134.392	111.176	100.071	126.93	111.727	140.303	124.963	165.203	124.947		127.328
		184.625	117.226	112.386	102.631	60.235	135.271	120.881	119.957	121.808	143.666	181.62	186.784		132.257			95.1677	128.85	170.047	134.392	130.957	88.1362	126.93	111.727	140.303	124.25	165.203	124.947		128.409
		184.428	117.226	112.386	107.229	60.235	94.035	120.881	117.502	121.808	105.638	181.62	186.784		125.814			86.6573	121.489	171.648	149.134	130.957	105.651	131.747	111.727	133.003	124.25	165.203	151.427		131.908
		139.187	117.226	112.386	62.8124	63.41	94.035	120.881	170.245	121.808	105.638	68.273	186.784		113.557			147.948	121.489	133.543	149.134	130.957	105.651	134.399	111.807	133.003	116.699	165.203	151.427		133.438
		139.187	117.226	112.386	80.2173	63.41	117.442	120.881	170.245	121.808	141.924	68.273	186.784		119.982			107.498	121.489	133.543	149.134	130.957	93.2814	134.399	111.807	133.003	116.699	165.203	95.8723		124.407
		139.187	117.226	112.386	80.2173	60.7797	117.442	120.881	170.245	121.808	141.924	68.273	186.784		119.763			102.308	121.489	133.543	155.707	163.613	93.2814	134.399	111.807	133.003	116.699	165.203	95.8723		127.244
		139.187	117.226	112.386	80.2173	60.7797	117.442	120.881	98.5555	121.808	141.924	192.355	186.784		124.129			109.671	83.0163	133.543	158.287	188.918	93.2814	134.399	111.807	116.643	116.699	165.203	95.8723		125.612
		139.187	83.5223	112.386	77.7243	85.0435	117.442	120.881	98.5555	121.808	141.924	192.355	186.784		123.134			146.214	92.4018	103.7	98.722	188.918	93.2814	134.399	111.807	116.643	116.699	165.203	95.8723		121.988
		139.187	83.5223	112.386	109.703	85.0435	142.993	91.4763	98.5555	121.808	107.066	106.931	186.784		115.455			100.771	92.4018	103.7	98.722	188.918	93.2814	134.399	99.526	102.528	93.4123	165.203	161.235		119.508
		139.187	83.5223	112.386	109.703	85.0435	101.587	91.4763	98.5555	121.808	107.066	106.931	186.784		112.004			100.771	97.15	133.543	98.722	188.918	111.105	134.399	99.526	102.528	93.4123	165.203	161.235		123.876
	CAMSAP2 siRNA																CAMSAP2 siRNA
	Non treated	35.455	7.7285		3.918	6.6625	12.058	4.315	4.742	6.883	10.519	4.742	6.011		9.36673		Y27632	15.457	14.827	40.255	5.8325	26.8597	11.6185	17.651	13.317			27.063	13.317		18.6198
		42.191	7.7285	8.373		6.87	19.6715			6.883	10.519	9.959	6.011		13.134			21.586	14.827	40.255	9.70233	26.8597	11.6185	17.651	13.317		24.048	27.063	13.317		20.0222
		34.0158	10.968	8.373			19.6715	8.203	19.755	6.455	7.299	9.959	10.34		13.5039			24.482		40.255	8.09867	26.8597		17.651	4.315	12.053	24.048	27.063	14.169		19.8994
		27.6063	10.7545	15.511	23.432	27.416	16.348	4.9565	15.1737	6.455	7.299	7.728	10.34		14.4183			14.827		27.4997	18.722	26.8597	118.086			12.053	24.048	27.063	14.169		31.4808
		36.2133	5.938	15.511	34.636	27.933	16.348	3.036	15.1737			7.728	3.435		16.5952			47.3565		29.6655	72.2315	35.4355	66.1305	32.634	7.412	9.446			4.483		33.8661
		42.2586	13.77	15.511	34.636	27.933	10.088	15.3552	22.114	7.728	4.742				19.4136			30.594	24.473	11.024	72.2315	35.4355	66.1305	32.634	142.118	13.0955	7.728	24.918	5.598		38.8317
		28.0777	22.5883	19.3365	24.8495	34.5635	12.7995	18.4747	17.7637		6.026		11.295		19.5774			30.594	24.473	39.2865	123.763	29.9615	63.984	62.6885	142.118	13.0955		24.918	33.063		53.4495
		27.5017	18.8675	29.689	18.097	38.642	17.5257	12.7823	17.4957	8.259		9.533	9.777		18.9245			55.3975	24.473	39.2865	123.763	29.9615	113.793	62.6885	142.118	24.692	37.7865	24.918	33.063		59.3284
		29.9648	22.591	21.2755	6.473	31.404	17.346	21.906	18.9607	6.44	5.728	12.909	11.397		17.1996			43.6033	50.239	37.404	60.5545	29.963	117.279	57.9715	142.118	22.9527	48.8597	46.8	20.908		56.5544
		32.6743	7.787	21.2755		31.404	17.745	6.03267	29.209	8.965	8.587	12.51	15.6735		17.4421			38.1422	50.239	37.404	26.461	33.546	117.279	77.9435	142.118	22.9527	48.8597	30.055	20.908		53.8257
		24.228	7.787	18.722	7.114	27.112	8.692	6.03267	26.2123	21.537	12.689	12.51	15.6735		15.6925			45.1128	27.9255	34.8545	88.466	34.456	64.075	77.9435	142.118	18.892	72.2747	30.055	20.908		54.7568
		20.1848	19.0035		7.114	27.112	21.101	15.68	26.2123	21.537	12.689	19.482	20.1825		19.118			37.011	27.9255	26.8055	88.466	31.5783	64.075	77.9435	142.118	59.4955	72.2747	25.9815	31.345		57.085
		12.0327	19.0035	26.202	52.815	33.948	21.101	15.68	42.293	21.537	22.972	19.482	20.1825		25.6041			41.3882	38.589	26.8055	54.1483	31.5783	107.773	77.9435	83.94	59.4955	72.2747	25.9815	31.345		54.2719
		24.758	29.654	34.783	52.815	33.948	16.1715	24.907	30.3443	21.5065	22.972	21.7095	20.627		27.8497			43.0127	50.147	28.101	54.1483	31.5783	107.773	77.9435	83.94	33.5226	71.711	27.05	31.345		53.356
		23.0996	29.311	44.3492	52.815	33.948	16.1715	24.907	20.3267	21.5065	21.683	21.7095			28.1661			43.0127	50.147	34.9925	68.0005	34.173	57.536	51.638	83.94	33.5226	71.711	27.05	27.636		48.6133
		29.5157	30.297	44.3492	19.99	54.973	10.3335	23.189	73.031	21.5065	21.683	30.083	31.3595		32.5259			32.507	80.952	27.558	68.0005	29.4865	118.074	51.638	58.2543	33.5226	71.711	47.7023	27.636		53.9202
		23.0996	30.297	57.814	21.356	19.326	12.0425	12.6825	52.5473	27.7085	23.712	30.941	30.7913		28.5265			32.524	80.952	23.5505	114.655	44.636	73.2115	59.6885	80.7225	44.6615	53.6905	29.434	29.2355		55.5801
		29.5157	19.66	53.7963	10.949	17.26	20.677	12.6825	61.6315	37.7003	5.598	25.5605	30.7913		27.1518			27.7125	69.3807	23.5505	30.914	54.6225	30.083	69.003	80.7225	44.6615	58.7218	29.434	29.2355		45.6701
		30.1808	12.827	53.7963	7.58267	12.025	10.902	15.028	44.254	39.2895		21.757	31.79		25.4029			27.7125	84.611	31.347	30.914	71.2987	37.4515	69.003	63.0063	44.6615	58.7218	29.434	34.7866		48.579
		21.7212	12.827	46.171	29.0215	32.0105	13.717	7.349	45.8407	39.2895	7.3305	21.757	31.79		25.7354			23.5165	84.611	47.5707	19.9798	71.2987	42.419	69.003	63.0063	53.488	58.7218	29.8817	34.7866		49.8569
		25.8928		46.171	31.6765	17.18	14.682	15.506	45.8407	29.849	7.3305	21.757	39.1057		26.8174			18.264	76.875	117.861	52.6243	57.979	42.419	69.003	87.16	53.488	54.8177	29.8817	34.7866		57.9299
		31.9062	12.02	67.637	30.6165	17.18	13.35	15.9187	39.6358	29.849	10.968	16.318	31.509		26.409			21.9183	61.0683	117.861	52.6243	57.979	51.465	96.3985	30.056	32.6912	54.8177	29.8817	40.6517		53.9511
		25.9128	17.2107	67.637	30.6165	21.897	34.5255	41.8343	39.6358	54.115	18.893	16.318	15.18		31.9813			32.0535	81.9703	59.0423	42.8558	57.979	51.465	65.517	49.4065	32.6912	56.5487	36.1983	40.6517		50.5316
		23.9656	32.2095	52.8453	16.1267	18.2587	55.4397	36.9255	39.7597	56.248	20.8255	34.8335	15.18		33.5515			28.7332	86.9576	50.8837	65.39	48.32	30.7123	78.9296	49.4065	32.6912	56.5487	36.1983	40.4258		50.4331
		36.378	37.0733	46.8603	35.7835	13.532	55.4397	36.9255	44.6807	56.248	29.853	55.852	33.072		40.1415			31.8014	85.9476	47.9853	65.39	28.3735	38.3135	78.9296	62.004	50.8293	36.8524	39.2935	43.486		50.7672
		17.0485	45.4205	46.8603	35.7835	13.532	39.047	38.0747	44.6807	67.861	29.853	55.852	33.072		38.9238			46.2485	85.9476	47.9853	46.058	36.7467	38.3135	61.9204	62.004	50.8293	36.8524	39.2935	43.486		49.6404
		13.7755	38.51	29.642	7.835	8.158	39.047	38.0747	33.3315	51.3785	20.844	59.5075	28.8177		30.7434			51.5612	85.9476	77.0753	54.377	85.035	36.6865	61.9204	47.7905	50.8293	36.8524	39.2935	35.0047		55.1978
		15.7117	36.7127	32.26	7.835	8.158	39.047	40.6527	33.3315	51.3785	20.844	38.7145	28.8177		29.4553			28.619	83.8382	97.8955	54.377	61.6145	36.6865	61.9204	47.7905	42.9635	40.3766	42.6516	35.0047		52.8115
		13.7755	37.8653	39.29			43.6703	35.648	17.327	33.7117	31.136	38.7145	28.8177		31.9956			32.947	83.8382	43.795	45.7563	130.746	37.8773	61.9204	31.1077	42.9635	40.3766	42.6516	35.0047		52.4154
		15.7117	47.339	30.6545	7.358	6.9285	43.6703	35.648	20.185	33.7117	31.136	36.8812	28.8177		28.1701			25.3517	74.402	43.795	45.7563	94.0305	33.3775	60.7698	38.007	39.9181	40.129	42.6516	31.6004		47.4824
		9.24433	31.245	19.8187	7.755	13.7595	23.057	35.648	20.185	33.7117	24.933	36.8812	22.2547		23.2078			25.3517	74.402	27.2867	32.5765	30.277	29.5064	60.7698	38.007	39.9181	40.129	42.6516	31.6004		39.373
		9.2505	31.245	31.377	7.755	13.7595	23.057	35.648	13.2207	33.7117	24.933	36.8812	22.2547		23.5911			25.151	91.1515	27.2867	32.5765	30.277	29.5064	60.7698	38.007	39.9181	40.129	47.4246	28.5405		40.8948

## Sheet: Figure 4F
Figure 4F
Cumulative sprout length		CTL siRNA	CTL siRNA	CTL siRNA	CAMSAP2 siRNA	CAMSAP2 siRNA	CAMSAP2 siRNA
(mm)		Non treated	Y27632	Blebbistatin	Non treated	Y27632	Blebbistatin
		1.46051	2.0613	2.20111	0.222213	0.215028	0.372781
		2.22757	1.98033	2.81131	0.141584	0.277647	0.227497
		1.66909	1.43762	1.9903	0.113107	0.169488	0.215779
		1.66909	1.86552	1.99173	0.114624	0.263255	0.337859
		1.60288	2.24455	2.20257	0.192583	0.180885	0.344076
		1.03289	1.84878	2.02671	0.211277	0.168269	0.3427
		1.61299	1.77369	1.77554	0.143439	0.343863	0.229384
		1.89181	2.12744	1.89505	0.174786	0.230272	0.290021
		1.91901	2.56779	1.84857	0.12872	0.316823	0.39363
		1.32453	2.76895	2.04035	0.413418	0.21966	0.191981
		1.98659	2.3255	1.89165	0.2522	0.23618	0.342687
		1.56368	2.26101	1.86212	0.154468	0.342454	0.287266
		1.83298	2.42755	1.99706	0.215269	0.32489	0.132072
		1.57053	1.48347	2.054	0.210536	0.227394	0.258203
		1.54831	2.19549	1.75696	0.20351	0.236874	0.304256
		1.80436	2.26812	1.59749	0.187691	0.276707	0.29198
		2.0347	1.85357	1.56429	0.111952	0.301916	0.360573
		1.9937	2.35332	1.77714	0.195368	0.248509	0.222726
		1.74484	2.55527	1.83123	0.19102	0.299896	0.290742
		1.02425	2.39552	1.61947	0.199816	0.402723	0.318437
		1.82793	2.76045	1.54062	0.205368	0.285537	0.339475
		1.70106	2.11063	1.77411	0.196253	0.194169	0.287781
		1.78093	2.59544	2.02339	0.212454	0.336936	0.210269
		1.18312	2.07572	1.89911	0.146972	0.319834	0.367354
		1.45319	2.04688	1.7995	0.127494	0.34395	0.215175
		1.22661	1.72943	1.97263	0.19852	0.337442	0.280958
		1.3104	1.83527	1.93508	0.173666	0.359086	0.341996
		1.54126	2.16787	1.89058	0.214804	0.245258	0.268892
		1.83091	1.78932	1.63313	0.198675	0.336619	0.14203
		1.83782	2.231	1.74019	0.258448	0.279142	0.241323
		1.72038	2.34218	1.87458	0.136738	0.365244	0.166883
		0.786148	2.05594	1.86466	0.175752	0.175176	0.313711
		1.20623	1.62567	1.57476	0.221432	0.18623	0.213756
		0.922603	1.59162	1.45034	0.212837	0.258031	0.163786
		1.34157	1.69745	1.41658	0.198225	0.229819	0.149644
		1.07639	1.56655	2.29077	0.211055	0.254935	0.180726
		1.03332	1.47553	1.36432	0.0987654	0.371614	0.230622
		1.47928	1.71239	1.55241	0.134217	0.202432	0.202801
		1.38046	1.58838	1.5776	0.156405	0.178035	0.187859
		1.48593	1.97048	1.55095	0.113258	0.246523	0.215588
		1.56468	2.27984	1.45365	0.158715	0.2118	0.204282
		1.62033	2.09936	1.43732	0.143656	0.166569	0.289264
		0.898371	1.24858	1.35628	0.183977	0.205571	0.185693
			1.22534	1.28634	0.219603	0.262478	0.133319
			1.66336	2.13135	0.127584	0.130226	0.187446
				1.81513	0.166919	0.237523	0.217442
				2.07733	0.185249	0.235195	0.18309
					0.138497	0.251846	0.195867
					0.210028	0.19288	0.248429
					0.123268	0.285631	0.219133
					0.107465	0.320945	0.119745
					0.0922977		0.164228
					0.240324		0.129705
					0.170857		0.246762
