# Supplementary material for: Control of endothelial cell polarity and sprouting angiogenesis by non-centrosomal microtubules
Source: eLife. 2018 Mar 16;7:e33864. doi: 10.7554/eLife.33864 (PMC5898915; doi:10.7554/eLife.33864)
Supplement: Figure 5—source data 1. [file elife-33864-fig5-data1.xlsx]

## Sheet: Figure 5A
Figure 5A
Directionality during migration		CTL siRNA	CAMSAP2 siRNA
		0.672	0.644
		0.706	0.521
		0.628	0.4
		0.599	0.355
		0.751	0.58
		0.66	0.498
		0.664	0.656
		0.845	0.401
		0.668	0.336
		0.528	0.507
		0.592	0.214
		0.634	0.471
		0.73	0.222
		0.716	0.227
		0.691	0.321
		0.575	0.581
		0.549	0.559
		0.876	0.609
		0.559	0.238
		0.842	0.248
		0.927	0.642
		0.762	0.529
		0.691	0.27
		0.883	0.856
		0.803	0.621
		0.742	0.608
		0.861	0.53
		0.65	0.601
		0.542	0.696
		0.679	0.78
		0.845	0.205
		0.782	0.367
		0.485	0.492
		0.721	0.184
		0.635	0.645
		0.815	0.601
		0.437	0.333
		0.873	0.421
		0.623	0.283
		0.574	0.503
		0.73	0.477
		0.572	0.463
		0.634	0.355
		0.681	0.564
		0.618	0.392
		0.722	0.403
		0.745	0.459
		0.822	0.329
		0.721	0.367
		0.732	0.468
		0.692	0.478
		0.539	0.408
		0.682	0.457
		0.697	0.502
		0.645	0.602
		0.592	0.563
		0.634	0.543
		0.701	0.544
		0.823	0.497
		0.844	0.522

## Sheet: Figure 5B
Figure 5B
Distribution of phenotypes			CTL siRNA	CAMSAP2 siRNA
		Golgi/lamel aligned towards the wound	29	16
		Golgi/lamel aligned not towards the wound	5	13
		Golgi/lamel not aligned	2	10
		tot	36	39
		Golgi/lamel aligned towards the wound	29	15
		Golgi/lamel aligned not towards the wound	3	14
		Golgi/lamel not aligned	2	11
		tot	34	40
		Golgi/lamel aligned towards the wound	58	31
		Golgi/lamel aligned not towards the wound	8	27
		Golgi/lamel not aligned	4	21
		tot	70	79
		Mean	82.8571	39.2405
			11.4286	34.1772
			5.71429	26.5823

## Sheet: Figure 5C
Figure 5C
Proportion of Rab6 track in the front		CTL siRNA	CAMSAP2 siRNA
(%)		0.91557	0.187392
		0.605763	0.236449
		0.494888	0.492137
		0.601493	0.770285
		0.69434	0.613018
		0.945671	0.190979
		0.811493	0.346555
		0.903005	0.634292
		0.63312	0.487227
		0.735844	0.2407
		0.517013	0.729089
		0.898128	0.202128

## Sheet: Figure 5D
Figure 5D																															Mean
Polarized Golgi	CTL siRNA	CAMSAP2 siRNA
(per spheroid)	68	13.0435
	68.4211	25
	73.0769	29.6296
	80.7692	21.0526
	64.2857	29.0323
	80	20.6897
	57.8947	34.6154
	63.3333	17.2414
	72.7273	17.6471
	88.8889	10.5263

## Sheet: Figure 5E
Figure 5E
Rab6 track number change		CTL siRNA					CAMSAP2 siRNA
(fold change compared to anterograde track		antero Maj	antero min	retro Maj	retro min		antero Maj	antero min	retro Maj	retro min
in the major protrusion)		1	0.555556	0.555556	0.277778		1	1	0.8	0.9
		1	0.4	0.6	0.2		1	0.833333	1	0.666667
		1	0.7	0.6	0.4		1	0.933333	1	0.666667
		1	0.6	0.6	0.2		1	0.4	0.8	0.2
		1	0.5	0.5	0.166667		1	0.777778	0.666667	0.611111
		1	0.833333	1	0.5		1	0.8125	0.75	0.625
		1	0.666667	0	0.666667		1	0.75	1	0.583333
		1	0.5	0.75	0.375		1	0.833333	0.666667	0.444445
		1	0.714286	0.857143	0.428571		1	1.2	0.6	0.8
		1	0.8	0.8	0.6		1	1.08333	1	0.833333
		1	0.35	0.65	0.2		1	0.666667	0.666667	1
		1	0.388889	0.333333	0.166667		1	1	1	0.866667
		1	0.375	0.875	0.4375		1	1	0.666667	0.666667
		1	0.461539	1.07692	0.153846		1	0.8	0.7	0.6
		1	0.4375	0.625	0.3125		1	1	0.555556	0.666667
		1	0.538462	0.923077	0.230769		1	1.1	0.6	0.3
		1	0.307692	0.846154	0.692308		1	1	0.4	0.4
		1	0.222222	0.666667	0.333333
		1	1.44444	0.777778	0.222222
		1	0.571429	0.642857	0.285714
