# Supplementary material for: Control of endothelial cell polarity and sprouting angiogenesis by non-centrosomal microtubules
Source: eLife. 2018 Mar 16;7:e33864. doi: 10.7554/eLife.33864 (PMC5898915; doi:10.7554/eLife.33864)
Supplement: Figure 6—figure supplement 1—source data 1. [file elife-33864-fig6-figsupp1-data1.xlsx]

## Sheet: Figure 6 Figure Supplement 1B
Figure 6 Figure Supplement 1B
Intensity profile		CTL siRNA				AKAP450 siRNA				MMG siRNA
(%)		GM130 mean	sem	CAMSAP2 mean	sem	GM130 mean	sem	CAMSAP2 mean	sem	GM130 mean	sem	CAMSAP2 mean	sem
		0.72914	0.0329697	0.7419	0.0396379	0.733463	0.03992	0.725337	0.0350351	0.67642	0.0414676	0.697036	0.04438
		0.817019	0.0180011	0.834427	0.0505041	0.826214	0.028163	0.726328	0.0360471	0.795809	0.0284121	0.703996	0.045698
		0.931362	0.00796402	0.916072	0.0615038	0.938612	0.0113647	0.723652	0.0420994	0.925259	0.0138088	0.706386	0.0488696
		1	0	0.956318	0.0624409	1	0	0.734357	0.0415858	1	0	0.699368	0.0505486
		0.943094	0.00858749	0.929798	0.051348	0.924633	0.0112997	0.717585	0.0397523	0.93743	0.00841044	0.695496	0.0518368
		0.852997	0.0117898	0.898593	0.0446903	0.8267	0.017469	0.701245	0.0393201	0.843527	0.0209689	0.699876	0.0530565
		0.771248	0.0215992	0.877116	0.0452035	0.751757	0.0228765	0.693762	0.0415626	0.753567	0.0303359	0.699066	0.0535814
		0.736555	0.0296162	0.866861	0.0436369	0.682226	0.0241877	0.678217	0.043424	0.697165	0.0367712	0.695809	0.0545098
		0.691943	0.0330343	0.851285	0.0506358	0.627077	0.0290289	0.66175	0.0439636	0.646541	0.041274	0.679337	0.0553093
		0.64465	0.0396432	0.838791	0.0527713	0.58469	0.0316239	0.653292	0.0458431	0.588	0.0425853	0.668837	0.0546484
		0.615545	0.040251	0.818274	0.0534558	0.556844	0.0326966	0.647995	0.0469356	0.538167	0.0408665	0.649944	0.0515161
		0.577641	0.040513	0.756317	0.0507215	0.533033	0.0346564	0.641312	0.0501086	0.505433	0.03987	0.630951	0.0479176
		0.532266	0.0419183	0.71855	0.0514939	0.485078	0.0345284	0.622761	0.0470614	0.454265	0.0398569	0.605267	0.0479765
		0.497878	0.0378573	0.69268	0.0481191	0.451378	0.0365591	0.599783	0.0401426	0.410448	0.0383073	0.585841	0.0478136
		0.471909	0.0359568	0.668339	0.044444	0.420708	0.0370494	0.582394	0.0335495	0.373729	0.0377244	0.564188	0.0455936
		0.439803	0.0324371	0.622815	0.0435312	0.393675	0.0348363	0.566753	0.0296749	0.336137	0.0398432	0.534783	0.0417531
		0.40021	0.0294754	0.581913	0.0357338	0.37451	0.0372673	0.547101	0.0276178	0.300684	0.0380651	0.514603	0.0420943
		0.359376	0.0275782	0.541108	0.0337971	0.355097	0.036607	0.526981	0.0282034	0.276978	0.0353586	0.503085	0.042004
		0.329319	0.0274303	0.527536	0.0344038	0.319199	0.0303468	0.500444	0.0285459	0.249936	0.0319757	0.492033	0.0378935
		0.314524	0.0266135	0.501742	0.0337431	0.290502	0.0270792	0.481499	0.0316514	0.223478	0.0288346	0.468011	0.0357765
		0.285925	0.0237224	0.461322	0.029938	0.27539	0.0268308	0.481098	0.0332297	0.196472	0.0236806	0.457018	0.0364691
		0.266093	0.022054	0.435128	0.0302556	0.263273	0.0278115	0.475473	0.0310729	0.17338	0.018962	0.445969	0.0373847
		0.247759	0.0234388	0.420717	0.0317097	0.24799	0.0271358	0.458056	0.0287305	0.1548	0.0172651	0.431949	0.0359453
		0.216658	0.0241029	0.390114	0.0320542	0.230264	0.0270997	0.437982	0.0284565	0.140961	0.0142306	0.413644	0.0343186
		0.193351	0.0221714	0.365069	0.0337629	0.212587	0.0237065	0.412133	0.0284018	0.128358	0.0114044	0.400349	0.0338289
		0.175022	0.0196153	0.355154	0.0331037	0.187592	0.0201018	0.390484	0.0277985	0.119949	0.0104802	0.398655	0.034077
		0.160233	0.0174615	0.336768	0.032715	0.172827	0.017488	0.37267	0.0257324	0.114704	0.0103855	0.395592	0.0339918
		0.148608	0.0150995	0.317081	0.0298924	0.158305	0.0157336	0.356252	0.0253434	0.110625	0.0101271	0.38901	0.0334269
		0.134842	0.0143628	0.293637	0.0273206	0.148688	0.0140147	0.344521	0.0253939	0.108388	0.0109277	0.375377	0.0336103
		0.122835	0.0125117	0.275782	0.0268293	0.142392	0.0135378	0.334107	0.0251904	0.100148	0.00975311	0.357562	0.0330582
		0.115532	0.0115727	0.258314	0.0257649	0.138691	0.0126461	0.325253	0.0246563	0.0949434	0.00993339	0.336897	0.0317555
		0.107482	0.0110532	0.240403	0.0262338	0.131809	0.0115249	0.31965	0.0229515	0.0892545	0.00948368	0.322282	0.0326934
		0.102074	0.0104253	0.223545	0.027027	0.124205	0.0106578	0.305721	0.020749	0.0852703	0.0097114	0.30866	0.0318395
		0.0956734	0.00984776	0.204226	0.0265781	0.115193	0.00940109	0.292006	0.0179303	0.0778052	0.00954024	0.299487	0.0325766
		0.0902414	0.0104147	0.196422	0.0262937	0.111316	0.00904416	0.278214	0.0167156	0.069949	0.0071877	0.292736	0.0315231
		0.0850171	0.0098201	0.184314	0.0256498	0.106193	0.00963578	0.267693	0.0174418	0.0675841	0.00697105	0.285216	0.0323248
		0.0779935	0.00871045	0.167921	0.0244471	0.100208	0.00943514	0.259218	0.0181998	0.0656112	0.00708655	0.271794	0.0315042
		0.0727574	0.00868637	0.157124	0.0238947	0.0975761	0.0107396	0.253269	0.0195917	0.0638244	0.00729111	0.253801	0.029713
		0.0672436	0.00772166	0.150389	0.0223775	0.0931446	0.0107782	0.243165	0.0202866	0.0614405	0.00830417	0.24565	0.0303515
		0.0642091	0.00729595	0.144945	0.0210073	0.0889781	0.0111345	0.220397	0.0183435	0.0595992	0.00910651	0.231417	0.0271005
		0.0618727	0.00678089	0.128324	0.0205328	0.0830909	0.0093676	0.205324	0.0164862	0.0550851	0.0074901	0.21214	0.0217992
		0.0596773	0.00586426	0.12275	0.0187958	0.0753341	0.0075521	0.199426	0.0159872	0.052985	0.00743871	0.195617	0.0189953
		0.0584973	0.00582852	0.121544	0.0197715	0.0702614	0.00672364	0.193532	0.0150309	0.0514767	0.0072889	0.183527	0.0163925
		0.0578083	0.00724528	0.121366	0.0226557	0.0666022	0.00656642	0.186646	0.0142325	0.0490078	0.00721627	0.17322	0.0152506
		0.0549415	0.00810215	0.116429	0.0219343	0.0650576	0.00733734	0.174192	0.0128524	0.0459765	0.00709079	0.169463	0.0172668
		0.0516805	0.00860407	0.104065	0.0221142	0.0614207	0.00702082	0.162025	0.0136974	0.043385	0.00715319	0.163282	0.0146488
		0.0514842	0.00990223	0.0922722	0.0233192	0.0579075	0.00705178	0.150573	0.0139981	0.0420423	0.00724044	0.159493	0.0138399
		0.0483409	0.00914466	0.0857268	0.0232626	0.0554704	0.00718125	0.142651	0.0153588	0.0411834	0.00729761	0.153293	0.0143625
		0.0444196	0.00889218	0.0796339	0.0217505	0.0530388	0.00714854	0.137983	0.0162119	0.0403338	0.00734461	0.150387	0.0152518
		0.0429985	0.00912717	0.0773637	0.020789	0.0525873	0.00750496	0.134864	0.0156171	0.0388245	0.00734823	0.149082	0.0164759
		0.0411198	0.00816009	0.0769769	0.0184946	0.0511226	0.00766747	0.134147	0.0147245	0.0370538	0.0073961	0.142884	0.015774
		0.0392338	0.00780404	0.0766267	0.0179281	0.0504196	0.00812771	0.126798	0.0134414	0.0348906	0.007497	0.132775	0.0138425
		0.0364372	0.00736422	0.0736844	0.0186469	0.0489231	0.00759381	0.116549	0.0127755	0.0328172	0.0075408	0.124394	0.0141707
		0.0346559	0.00660966	0.0721884	0.0190255	0.0476949	0.00748571	0.109513	0.0113342	0.0315425	0.00755414	0.114787	0.0135054
		0.0343677	0.00623806	0.0698643	0.0175046	0.0427143	0.0062731	0.104304	0.0104419	0.0309681	0.00760017	0.109487	0.0118565
		0.0321135	0.00619005	0.0680546	0.0156713	0.0384223	0.00501526	0.0995341	0.0103012	0.0303202	0.00765266	0.107535	0.00980873
		0.0302202	0.00629392	0.0671446	0.0152294	0.0347453	0.00415547	0.0949382	0.0107242	0.0309696	0.00776926	0.107571	0.00940113
		0.0286563	0.00578433	0.0669793	0.0140581	0.0329606	0.0032952	0.0921021	0.0107469	0.0304161	0.00792999	0.10015	0.00802468
		0.0262255	0.00458819	0.0642654	0.0125128	0.0306831	0.00306091	0.0845507	0.0107585	0.0297238	0.00802027	0.0905235	0.00760445
		0.0251483	0.00411522	0.0612295	0.0118884	0.0287643	0.00286855	0.0800026	0.0103421	0.0285933	0.00805044	0.084652	0.0080133
		0.0253632	0.00395334	0.0590852	0.012145	0.0267713	0.00276702	0.0805978	0.00980842	0.0281114	0.00826356	0.0787423	0.00793676
		0.0250662	0.0039035	0.0602496	0.0121131	0.0268719	0.00302388	0.0793562	0.00922985	0.0271476	0.00807731	0.0748949	0.00824469
		0.0241258	0.00388637	0.0617646	0.0120353	0.0267627	0.00351255	0.078113	0.00816398	0.0266021	0.0079815	0.072023	0.00834484
		0.0223439	0.00388161	0.0602804	0.0114486	0.0252778	0.00324121	0.0723038	0.00808152	0.0253248	0.00800213	0.0665102	0.00823209
		0.020384	0.00376015	0.0602272	0.0115256	0.0261554	0.00346028	0.0662063	0.00750933	0.0239876	0.00793568	0.0610441	0.00765126
		0.0189962	0.00359571	0.059945	0.0107863	0.0253221	0.00365867	0.058156	0.00677143	0.0220948	0.00795463	0.0592092	0.00699981
		0.0184007	0.00347006	0.0603209	0.0104535	0.0232781	0.00310504	0.0531737	0.00668018	0.0215316	0.00797878	0.0576138	0.00627299
		0.0178386	0.00360159	0.0592908	0.0105352	0.0208092	0.00260412	0.0492336	0.00646048	0.020868	0.00797362	0.0543074	0.00561318
		0.0171054	0.00346571	0.0566921	0.0110397	0.0186454	0.00294277	0.047317	0.00735073	0.0202366	0.00799644	0.0497915	0.00552485
		0.0158623	0.00329245	0.0569698	0.0114969	0.0179942	0.00316715	0.0470431	0.00807972	0.0191137	0.00805135	0.0439953	0.00574075
		0.0144948	0.00315383	0.0557074	0.0117516	0.0184338	0.00246139	0.0470562	0.00917708	0.0182656	0.00809876	0.0392111	0.00578519
		0.0151334	0.00308742	0.0520631	0.0122598	0.0180288	0.00252545	0.0449637	0.00843434	0.0175059	0.00813502	0.0363168	0.00562718
		0.0141043	0.00315149	0.0515324	0.0123149	0.0167532	0.00251086	0.0423526	0.00776677	0.0103235	0.00200927	0.0325717	0.00499122
		0.0137362	0.00312527	0.0519868	0.0120576	0.0162484	0.00265223	0.0396071	0.00655643	0.00990372	0.00167358	0.0318339	0.00478167
		0.0136495	0.00328063	0.0513132	0.0118737	0.0157808	0.00252597	0.0367579	0.00605829	0.00848857	0.00120406	0.032146	0.00481902
		0.0142861	0.00339855	0.0511822	0.0120771	0.0168754	0.0030697	0.0330045	0.00605215	0.00761852	0.001073	0.0320717	0.00511307
		0.0302073	0.0158021	0.0510425	0.0121848	0.0176081	0.00390761	0.0300525	0.00553588	0.00772561	0.0011692	0.0311319	0.00465821
		0.0136377	0.00328007	0.0421936	0.0112772	0.0179122	0.0045751	0.0271796	0.0054875	0.00677318	0.00109381	0.029553	0.00441565
		0.0136306	0.00319369	0.0415388	0.0111021	0.0176278	0.00433377	0.0264749	0.00634538	0.00680821	0.00105517	0.0257809	0.00413077
		0.014142	0.00337454	0.041684	0.010816	0.0160003	0.00370381	0.0277838	0.00680043	0.0064109	0.00109011	0.0234162	0.00435199
		0.0113428	0.00330026	0.0395648	0.0109884	0.0154647	0.00322599	0.0296145	0.00559905	0.00602204	0.00113983	0.0191044	0.0041176
		0.00982998	0.00286849	0.0383489	0.0107536	0.0145746	0.00258887	0.0278682	0.00533586	0.00525243	0.00107437	0.0156469	0.00408575
		0.0101891	0.00285774	0.0374852	0.0107964	0.0144016	0.00284691	0.0232954	0.00547664	0.00433952	0.000881603	0.0126392	0.00396442
		0.0097032	0.00266562	0.037685	0.0108532	0.0151989	0.00338031	0.0217677	0.00581258	0.00434386	0.000762247	0.0129526	0.0036163
		0.00882246	0.00246373	0.0375162	0.0108432	0.0141224	0.00323455	0.0201776	0.0062825	0.00412332	0.000729467	0.0123286	0.00321789
		0.00864843	0.00246645	0.0392646	0.0108238	0.0118837	0.00302315	0.0164807	0.0053987	0.00391135	0.000697269	0.011351	0.00284266
		0.0077536	0.00242136	0.0399113	0.0108853	0.0103015	0.00285686	0.0113495	0.00421992	0.00337792	0.00063244	0.0104662	0.00276487
		0.0070975	0.00233913	0.0409327	0.0108439	0.00900051	0.00285576	0.00807217	0.0038786	0.00406415	0.000579724	0.0125089	0.0028185
		0.00760851	0.00240926	0.0419495	0.0108638	0.00798974	0.00252089	0.00560185	0.00303303	0.00313216	0.000584921	0.014535	0.0036964
		0.00697416	0.00247515	0.0421861	0.0109659	0.00656145	0.00253362	0.00623437	0.00260792	0.00255937	0.000605344	0.0163497	0.00447168
		0.00626735	0.00202901	0.0414209	0.0110268	0.00546867	0.002957	0.00668323	0.00269852	0.00207482	0.00064088	0.0134429	0.00314767
		0.00577903	0.00181666	0.0404642	0.0110543	0.00339434	0.00284713	0.00598023	0.00287087	0.0026021	0.000625798	0.0113227	0.00253122
		0.00419863	0.00131894	0.0396445	0.0110237	0.00352542	0.00245115	0.00625864	0.00316994	0.00292184	0.000639156	0.0120331	0.00385544
		0.00384886	0.00110543	0.0391452	0.0111551	0.0036312	0.00178502	0.00360235	0.00337678	0.00269323	0.000650143	0.010038	0.00359726
		0.00347842	0.00100745	0.032724	0.0109763	0.00338667	0.00160537	0.00359254	0.00377262	0.00228392	0.000537491	0.00892199	0.00377321
		0.00324796	0.00102487	0.0325413	0.0111717	0.00253148	0.0015567	0.00312705	0.00410404	0.002395	0.000544744	0.00735435	0.00300138
		0.00213827	0.000879633	0.0310362	0.011458	0.00266396	0.00147366	-0.000183128	0.00393678	0.00176931	0.000583628	0.00465437	0.00217944
		0.0021091	0.000854174	0.0153852	0.00627572	0.00239281	0.00128625	0.00225809	0.002514	0.00175705	0.000579642	0.00872324	0.00249229
		0.0014165	0.000742067	0.0151884	0.0062736	0.00210976	0.0010923	0.00210677	0.00205233	0.00139009	0.000471115	0.00960254	0.00253084
		0.00125862	0.000668721	0.0149588	0.00621885	0.00250973	0.00105384	0.00385326	0.00197053	0.000751686	0.000305594	0.00769522	0.00233456
		0.00129093	0.000660114	0.0042811	0.00274772	0.00120455	0.000915898	0.00458745	0.0017785	0.000403135	0.000216862	0.00626642	0.00172395
		0.0010384	0.000502003	0.0042811	0.00274772	0.00139136	0.00101981	0.00456874	0.00153787	-0.000150808	0.00012612	0.00186462	0.00102193
		0.00060919	0.000375125	0.00386659	0.00275046	0.00221275	0.000948619	0.00456327	0.00178103	-0.00023078	9.86702e-05	0.00087125	0.00137692
		0.00064996	0.000425868	0.00386659	0.00275046	0.00276734	0.000823337	0.00638161	0.00193798	2.32699e-05	9.46531e-05	0.00339684	0.00174671
		0.000885508	0.000470521	0.00142145	0.000757245	0.00217897	0.000434761	0.0051609	0.00178254	-0.000148589	3.07278e-05	0.00396458	0.00105687
		0.000638563	0.0003339	0.00142145	0.000757245	0.00208424	0.00055563	0.00537312	0.00187613	0.000100116	3.16593e-05	0.00101369	0.000320558
		0.000710726	0.000371758	0.00142145	0.000757245	0.00278401	0.000767868	0.00747978	0.00218693	0.00021005		0.00434412
		0.000585022	0.000305636	0.00142145	0.000757245	0.00375642	0.000692906	0.0118543	0.00356066	0.000104171		0.00318967
		0.000525022	0.000278657	0.00142145	0.000757245	0.00252494	0.000423147	0.0108772	0.00413023	-0.000540496		0.00812913
		0.000384633	0.000214494	0.00142145	0.000757245	0.00213528	0.000473761	0.0074247	0.00288771	-0.00161935		0.0110006
		0.000439391	0.000237434	0.00142145	0.000757245	0.00141204	9.98347e-05	0.00522984	0.00173112	-0.00124344		0.0122666
		0.000248467	0.000135425	0.00142145	0.000757245	0.000747175	0.000374508	0.00289229	0.00021469	-0.000728346		0.00536393
		0.000407421	0.000212888	0.00142145	0.000757245	0.00058958	0.000141382	0.00213482	0.000421003	0.000407421		0.000212888
		0.000180755	0.00010906	0.00142145	0.000757245	0.000179822	5.68646e-05	0.000790092	0.000249849	0.000180755		0.00010906
		0.000100206	5.5342e-05	0.00142145	0.000757245					0.000100206		5.5342e-05
		7.07625e-05	5.48124e-05	0.00142145	0.000757245					7.07625e-05		5.48124e-05

## Sheet: Figure 6 Figure Supplement 1C
Figure 6 Figure Supplement 1C
Migration velocity
(μm/min)		CTL siRNA	AKAP450 siRNA	MMG siRNA	CAMSAP2 siRNA
		0.64868	0.810823	0.701299	0.84801
		0.816289	0.712337	0.689939	0.736128
		0.587595	0.805679	0.65168	0.809966
		0.834185	0.738807	0.63164	0.625103
		0.501861	0.577521	0.860763	0.50079
		0.636891	0.791104	0.743951	0.58588
		1.05259	0.792176	0.683938	0.882946
		0.738807	0.909738	0.791855	0.738593
		1.05248	0.646429	0.480857	0.908988
		0.910059	0.999758	0.57077	0.790676
		0.953998	0.791104	0.790676	0.775351
		0.561446	0.792819	0.7417	0.802893
		0.894627	0.538191	0.683509	0.459638
		0.667541	0.639142	0.929992	0.576771
		0.949207	0.943645	0.81332	0.706153
		0.907466	0.899053	0.926852	0.950911
		1.01575	0.69219	0.771321	0.632648
		0.694686	0.81332	0.654724	0.909041
		0.937012	0.802593	0.68861	0.917732
		0.90977	0.655721	0.598987	0.875895
		1.01406	0.705039	0.813427	0.813813
		0.900564	0.686917	0.90438	0.752021
		0.956152	0.796548	0.684709	0.742901
		0.975077	0.893791	0.8027	0.801585
		0.89915	0.899139	0.883653	0.684709
		0.674432	0.695747	0.894252	0.77998
		0.792176	0.695812	0.748377	0.844934
		0.79284	0.89915	0.695372	0.685031
		0.996436	0.782585	0.802925	0.839458
		0.953033	0.702938	0.786625	0.738946

## Sheet: Figure 6 Figure Supplement 1D
Figure 6 Figure Supplement 1D
Oriented Golgi
(% of cells)		CTL siRNA	AKAP450 siRNA	MMG siRNA	CAMSAP2 siRNA
		73.3333	56.6667	50	53.3333
		83.3333	43.3333	43.3333	53.3333
		70	63.3333	53.3333	43.3333
