# Supplementary material for: Control of endothelial cell polarity and sprouting angiogenesis by non-centrosomal microtubules
Source: eLife. 2018 Mar 16;7:e33864. doi: 10.7554/eLife.33864 (PMC5898915; doi:10.7554/eLife.33864)
Supplement: Figure 6—source data 1. [file elife-33864-fig6-data1.xlsx]

## Sheet: Figure 6A
Figure 6A
CAMSAP2 fold enrichment at Golgi		CTL siRNA	AKAP450 siRNA	MMG siRNA
(fold enrichment)		3.41895	0.513228	1.57648
		2.66051	2.10506	1.0448
		3.20013	2.6644	0.912509
		1.74519	2.17806	1.35896
		1.57551	0.723967	1.10392
		3.70289	1.36192	1.43851
		3.83021	1.73007	1.0783
		4.23105	0.656577	1.66613
		3.46506	0.939474	1.54347
		5.79225	1.61963	0.779854
		3.67735	1.83662	1.56955
		5.86594	0.694568	0.744657
		3.20297	1.68741	1.44391
		3.7896	2.29671	1.67722
		4.26555	0.573309	0.807226
		7.33241	1.45783	1.65554
		2.50617	0.754609	0.459871
		8.36711	0.951044	0.906516
		4.62158	0.947092	1.68335
		3.71028	1.1415	1.07351

## Sheet: Figure 6B
Figure 6B		Wound closure area					Directionality
Migration parameters		(%)					CTL siRNA	AKAP450 siRNA	MMG siRNA	CAMSAP2 siRNA
		CTL siRNA	AKAP450 siRNA	MMG siRNA	CAMSAP2 siRNA		0.6635	0.4844	0.437	0.3034
		97.4286	83.0686	73.1993	69.3684		0.7303	0.5725	0.2928	0.4641
		95.9253	68.1776	47.3421	54.8551		0.7469	0.4993	0.4517	0.5127
		90.6745	83.6487	83.5118	78.8868		0.7843	0.6032	0.3344	0.4865
		89.4763	59.3479	52.4657	79.4569		0.8348	0.3834	0.5277	0.5833
		99.438	65.4789	58.4651	73.4634		0.5932	0.5012	0.4132	0.5793
		93.0969	69.3426	82.0439	70.9835		0.7326	0.4734	0.5734	0.6432
		98.3467	63.4302	59.6563	81.4651		0.8345	0.4992	0.4104	0.4432
		94.5602	57.0231	74.5469	45.4988		0.6734	0.5722	0.3796	0.5123
		98.4397	60.5489	76.4664	79.3569		0.6832	0.4123	0.5329	0.5732
		88.438	67.3471	81.0652	71.3479		0.5854	0.6745	0.4294	0.4943
		95.5405	64.4364	83.4567	58.7894		0.6982	0.4238	0.3453	0.4563
		97.9284	66.9744	78.4641	52.4675		0.5732	0.5263	0.492	0.5711
		85.6542	70.6343	48.4408	58.4698		0.8193	0.4823	0.5495	0.4768
		92.7324	59.461	79.6438	71.6834		0.7352	0.5622	0.4733	0.5603
		98.6506	58.6433	64.3462	65.4326		0.6811	0.4893	0.6254	0.4892
		97.5468	68.9343	42.3473	69.5363		0.7133	0.4651	0.5933	0.5296
							0.8012	0.6432	0.6243	0.6984
							0.6743	0.5489	0.5233	0.5893
							0.7365	0.4637	0.5218	0.6343
							0.7523	0.5001	0.6482	0.5794
							0.6934	0.6332	0.5219	0.5324
							0.7321	0.5666	0.4983	0.698
							0.8454	0.439	0.5932	0.3632
							0.8933	0.6389	0.5687	0.6439
							0.6954	0.5673	0.4721	0.4985
							0.7332	0.421	0.6083	0.4923
							0.7944	0.4932	0.4532	0.4907
							0.8743	0.4734	0.4374	0.4832
							0.6329	0.4296	0.4033	0.3764

## Sheet: Figure 6C
Figure 6C
Cumulative sprout length
(mm)		CTL siRNA	AKAP450 siRNA	MMG siRNA	CAMSAP2 siRNA
		1.35476	0.63475	0.37254	0.05484
		1.03285	0.70859	0.57389	0.11657
		1.19664	0.35218	0.49785	0.05483
		1.18554	0.68447	0.72816	0.07583
		0.98734	0.83029	0.38582	0.22848
		1.03243	0.94592	0.70248	0.19844
		1.29572	0.74038	0.59119	0.09346
		1.05428	0.56368	0.43243	0.10402
		0.87648	0.69004	0.44874	0.11546
		0.93848	0.97274	0.35457	0.18422
		1.18427	0.37229	0.58328	0.05728
		1.08973	0.82357	0.37902	0.06498
		1.33328	0.17384	0.54627	0.05322
		1.09254	0.64383	0.44912	0.27212
		1.24839	0.55724	0.37293	0.18427
		1.08229	0.64329	0.57892	0.07539
		1.27763	0.29648	0.37466	0.09333
		1.19973	0.54638	0.56322	0.07223
		1.06536	0.74837	0.32788	0.07146
		1.11965	0.37538	0.42839	0.18472
		1.18593	0.64464	0.28728	0.04659
		0.86702	0.60237	0.34133	0.03638
		1.20249	0.32058	0.29846	0.05839
		1.08329	0.39547	0.48246	0.04358
		1.09854	0.30259	0.36538	0.10455
		1.19332	0.60427	0.3559	0.06705
		1.14376	0.57628	0.40678	0.04639
		1.03892	0.49457	0.43359	0.06045
		1.18428	0.45349	0.40157	0.08492
		1.20528	0.38247	0.37458	0.05933
		0.97533	0.62103	0.39629	0.08846
		0.83427	0.47648	0.42903	0.07349
		1.28382	0.36198	0.49294	0.04702
		1.18439	0.27238	0.40174	0.11438
		1.29027	0.28538	0.38674	0.05284
		1.24627	0.47903	0.69134	0.08375
		0.93405	0.37539	0.32457	0.11634
		1.04622	0.79829	0.54446	0.07329
		1.17497	0.64338	0.47666	0.06228
		1.04728	0.70339	0.47218	0.08339
		0.94328	0.53285	0.34104	0.14084
		1.04528	0.19246	0.76329	0.05877
		1.19044	0.73672	0.46339	0.03982
		1.14386	0.18328	0.17538	0.28437
		0.97353	0.93209	0.30285	0.07329
		1.14778	0.39264	0.42948	0.05529
		1.48293	0.31648	0.58328	0.11158
		1.29597	0.73349	0.60778	0.16393
		1.13455	0.63822	0.43366	0.04892
		1.07583	0.89373	0.34987	0.17654
		0.83577	0.73878	0.37448	0.19347
		1.04538	0.28476	0.40146	0.11457
		1.37633	0.39203	0.39284	0.04766
		1.2312	0.73284	0.19234	0.09249
		1.19384	0.09264	0.14784	0.07359
		1.04582	0.19264	0.43898	0.05738
		1.42375	0.39219	0.94589	0.12893
		1.23257	0.25592	0.79603	0.14438
			0.38238	0.81984
			0.93558	0.53067
			0.45975	0.19478
			0.38257	0.62057
				0.43474
