# Supplementary material for: Control of endothelial cell polarity and sprouting angiogenesis by non-centrosomal microtubules
Source: eLife. 2018 Mar 16;7:e33864. doi: 10.7554/eLife.33864 (PMC5898915; doi:10.7554/eLife.33864)
Supplement: Figure 7—figure supplement 1—source data 1. [file elife-33864-fig7-figsupp1-data1.xlsx]

## Sheet: Figure 7 Figure Supplement 1A
Figure 7 Figure Supplement 1A
EB comets		CTL siRNA	AKAP450 siRNA	MMG siRNA	CAMSAP2 siRNA	CTL siRNA	AKAP450 siRNA	MMG siRNA	CAMSAP2 siRNA
(number per 1000 μm2)		Non treated	Non treated	Non treated	Non treated	Centrinone	Centrinone	Centrinone	Centrinone
		31.7257	60.4531	65.1552	59.4433	50.3159	26.0324	44.0618	61.8536
		60.483	67.4315	66.8337	60.2411	45.3048	53.9431	39.9033	56.553
		49.1927	115.385	53.0568	75.7617	40.7976	54.682	57.5762	61.0153
		77.7371	79.7082	33.5339	45.7323	47.592	44.6731	94.3558	66.0073
		49.1731	38.6431	94.967	64.9327	55.065	64.8273	35.8923	49.7147
		53.0542	70.3958	75.7947	28.2613	49.8036	45.467	44.5996	46.7666
		70.7672	89.1828	37.1194	53.6976	55.4555	50.9596	47.3073	55.1336
		67.1271	49.304	43.6297	51.5078	46.7857	50.2332	27.3818	74.8754
		103.757	30.7977	44.8278	40.804	67.7676	72.7095	45.8219	49.954
		34.277	34.1662	95.9442	46.2399	52.8666	42.1839	37.0438	77.884
		47.7558	75.9106	81.2582	42.4065	48.3607	28.7587	79.6838	93.4011
		58.546	64.3881	81.1128	71.9445	67.8312	54.4085	80.0224	77.885
		27.2706	69.0269	75.7571	61.7321	82.7661	78.0356	60.6109	57.3645
		59.3448	76.3708	33.4127	76.9359	86.8127	47.1576	77.1991	38.4963
		80.5656	65.725	38.0718	81.3517	44.0259	73.9805	49.8652	50.2133
		62.9185	60.1286	86.2788	73.0574	62.831	81.5651	43.4299	50.1203
		55.006	47.5067	39.7109	48.1399	66.1709	42.5966	53.7193	52.063
		47.7427	56.9588	48.8731	34.0522	39.5331	87.9776	56.3444	49.7201
		58.4432	36.8684	47.8464	75.6109	48.9558	65.8841	49.1348	64.8451
			90.0775	42.6623	72.9594	66.6758	50.9452	94.3249	36.7446
					89.0288				46.3416

## Sheet: Figure 7 Figure Supplement 1B
Figure 7 Figure Supplement 1B
EB enrichment at Golgi		CTL siRNA	AKAP450 siRNA	MMG siRNA	CAMSAP2 siRNA
(fold change)		Centrinone	Centrinone	Centrinone	Centrinone
		1.0645	2.97577	4.4817	1.94341
		1.42369	1.27092	2.06679	2.24473
		1.43349	1.17819	2.4231	2.3038
		3.88475	1.27486	1.78876	2.12349
		2.46509	1.23755	2.83726	2.21147
		1.76264	4.11222	2.20117	1.1948
		5.4913	1.27779	1.02591	1.56951
		1.59763	0.827874	4.92568	5.29816
		1.53253	1.83075	2.74488	1.04045
		1.64892	0.858123	1.96271	2.67145
		1.06553	1.49717	1.11458	5.99
		2.31626	1.33376	1.77897	2.52459
		2.50212	1.31966	1.17065	2.21909
		2.43129	1.18268	2.12007	1.91664
		2.40559	0.789228	2.29019	1.81475
		2.15589	3.11321	2.83975	1.65365
		4.14942	3.00088	1.16787	1.64487
		2.83993	1.08233	3.6664	1.80292
