# Supplementary material for: Control of endothelial cell polarity and sprouting angiogenesis by non-centrosomal microtubules
Source: eLife. 2018 Mar 16;7:e33864. doi: 10.7554/eLife.33864 (PMC5898915; doi:10.7554/eLife.33864)
Supplement: Figure 7—source data 1. [file elife-33864-fig7-data1.xlsx]

## Sheet: Figure 7B
Figure 7B
α-tubulin intensity		CTL siRNA	AKAP450 siRNA	MMG siRNA	CAMSAP2 siRNA	CTL siRNA	AKAP450 siRNA	MMG siRNA	CAMSAP2 siRNA
(103 a.u.)		Non treated	Non treated	Non treated	Non treated	Centrinone	Centrinone	Centrinone	Centrinone
		895	990	1011	764	1041	847	866	838
		1000	952	1050	776	1127	947	1014	807
		1127	1098	900	1214	979	928	964	848
		846	952	784	1052	946	819	1111	978
		982	892	881	942	895	1000	931	837
		1012	814	1083	937	969	875	907	894
		1042	948	1120	987	921	1034	847	906
		1072	1018	1172	947	915	881	834	883
		1018	859	999	974	831	893	953	1028
		891	975	1189	1021	949	1153	929	727
		861	932	1068	933	680	924	991	902
		1046	957	923	1122	807	852	1055	1113
		1035	1000	1188	843	902	973	1125	1111
		1054	862	1575	930	1087	823	928	1082
		1102	1019	867	1031	979	1073	961	1104
		1083	994	978	1224	940	1049	1134	1112
		891	1036	917	1325	1025	938	1038	1003
		919	1180	862	1254	777	1134	1148	818
		884	1012	1000	1031	943	1045	1021	830
		1047	928	926	995	953	1319	998	811
		916	922	1060	1053	1106	808	846	1016
		914	1010	1041	982	890	1186	847	1186
		1009	999	1025	989	918	1054	931	1286
		898	1130	1069	831	816	1115	1032	932
		892	1119	886	838	869	954	1068	1148

## Sheet: Figure 7D
Figure 7D
Golgi enrichment index		γ-tubulin									α-tubulin
(%)		CTL siRNA	AKAP450 siRNA	MMG siRNA	CAMSAP2 siRNA	CTL siRNA	AKAP450 siRNA	MMG siRNA	CAMSAP2 siRNA		CTL siRNA	AKAP450 siRNA	MMG siRNA	CAMSAP2 siRNA	CTL siRNA	AKAP450 siRNA	MMG siRNA	CAMSAP2 siRNA
		Non treated	Non treated	Non treated	Non treated	Centrinone	Centrinone	Centrinone	Centrinone		Non treated	Non treated	Non treated	Non treated	Centrinone	Centrinone	Centrinone	Centrinone
		11.7707	32.7716	18.9364	4.42454	57.5789	13.4722	23.6505	43.1081		73.6995	41.3682	45.2838	16.608	19.7427	-23.4353	-10.7861	7.8945
		-2.0144	-15.2348	-11.5598	42.0697	104.918	17.4122	37.9864	16.8301		59.6483	5.16961	24.233	5.9691	23.1526	-1.43288	-0.268337	-8.44645
		2.81848	8.51995	-2.88649	8.69292	37.8249	5.53658	52.212	46.9226		54.0958	-27.5965	10.6626	-18.8316	16.0123	-14.505	-15.5734	16.1326
		7.59492	-24.048	-2.01585	13.5933	19.2969	7.19943	95.1549	39.1439		39.5282	-23.4629	-22.4383	-21.3878	13.2361	6.96177	-16.9506	12.73
		-1.09083	-17.1435	2.25559	9.06794	64.9565	-7.03491	37.7027	23.373		20.5582	-37.3964	-15.3574	53.4756	18.8828	3.51362	3.73846	5.13242
		14.2941	18.5863	32.3174	15.5097	34.2839	10.5436	24.3068	46.5158		33.3788	2.47562	12.9499	40.2011	36.1546	-13.8605	10.1647	-3.00005
		-15.3481	1.91534	6.01441	-6.79713	40.8622	3.2414	76.6546	22.2113		27.2214	11.714	13.2227	5.87669	56.9561	20.3023	17.6616	65.3284
		14.6532	17.6586	17.2576	8.91985	19.9484	-5.13375	46.4271	38.1166		70.1225	6.83459	12.2188	19.8565	53.6019	-32.015	-4.22162	18.0487
		-11.9212	-38.5268	11.6607	40.1491	39.1589	-16.7944	52.3606	9.65565		11.5187	41.507	27.124	1.79066	53.2196	-32.5472	1.91441	-19.7939
		-12.0123	-4.7126	4.47408	2.016	25.7116	3.41954	27.0159	21.1125		24.2739	56.1387	41.3877	-18.115	29.1107	-3.93776	11.3663	-28.0533
		-2.0012	6.30492	16.976	-15.8085	15.1855	8.95468	30.0772	35.388		21.3431	3.12347	3.11595	12.0524	39.2891	-17.7983	-10.7825	-2.28308
		-10.229	4.12183	-9.53991	-4.32195	34.4188	4.64163	24.5257	67.8072		30.8233	5.08474	19.124	25.1369	25.111	-8.52741	-4.18946	38.8643
		-3.25925		5.12304	16.5236	33.6225	-10.5321	61.6692	46.5425		71.0305	-11.7101	2.04872	-6.39797	47.4137	15.4999	-4.47364	-28.7553
		3.11914			7.04044	68.7074	2.12332	35.1079	50.4507		47.0238	11.3092		10.3523	24.5002	-6.2143	-6.30261	-19.162
		6.35109				57.7295	0.392184		55.3984		23.9499					-28.1764		40.0341
		-3.35124				41.0821	-17.1537									10.2222
						39.4685	-3.58669
						25.2161	-15.1835
						39.2507	15.779
						38.6793	-13.1863
						66.8731
						59.9551
						40.9634
						21.3751
						15.8165
						38.9138
						25.154
						39.1153
						36.5399
						9.40909
						47.8428
						24.2298
						32.67

## Sheet: Figure 7E
Figure 7E		CTL siRNA	CTL siRNA	AKAP450 siRNA	AKAP450 siRNA	MMG siRNA	MMG siRNA	CAMSAP2 siRNA	CAMSAP2 siRNA
Cumulative sprout length		Non treated	Centrinone	Non treated	Centrinone	Non treated	Centrinone	Non treated	Centrinone
(mm)		1.69617	1.28632	0.798111	0.913898	0.806177	1.12516	0.288631	0.59825
		1.74674	1.58011	0.694491	0.742863	1.40859	0.54835	0.346778	1.02565
		1.79571	1.61314	0.77055	0.7745	0.778338	1.08536	0.343474	0.25469
		1.29345	1.95841	1.09651	0.815388	1.10759	1.02565	0.098674	0.65847
		1.1082	1.67241	0.916684	0.944712	0.925949	0.95426	0.504289	1.18532
		1.46214	1.01435	0.99316	0.938097	1.0032	0.68425	0.07525	0.54789
		1.58378	1.4469	0.888402	0.804527	0.897381	1.11569	0.349767	0.98542
		2.0787	1.08313	0.852077	0.394721	0.860689	0.39871	0.24713	0.8925
		1.15225	1.04558	0.540184	0.592684	0.545643	0.598674	0.125483	0.845673
		1.54865	1.18404	0.543242	0.65136	0.548732	0.657943	0.048589	0.548254
		1.25411	1.07351	0.696967	0.894443	0.987384	0.903483	0.448589	0.643943
		1.38726	1.42366	0.531471	0.919381	1.20592	0.928673	0.056924	0.274552
		1.02597	1.38783	0.584211	0.763732	0.894743	1.07448	0.092647	0.536934
		1.12575	1.23446	0.677404	0.93731	0.932567	0.946783	0.158473	0.456887
		0.98722	1.14782	0.699411	0.726412	0.453953	0.733754	0.195232	1.01047
		1.48533	1.5749	0.571231	0.834976	0.374983	0.439372	0.485469	0.832453
		1.56484	1.26574	1.02583	0.629691	1.13721	0.838076	0.125473	0.372022
		1.67349	1.06563	1.07318	1.03541	1.08402	1.04587	0.068458	0.632674
		1.60248	1.22136	0.83373	0.727982	0.842156	0.735339	0.073758	0.673654
		1.63258	1.38437	0.74091	0.814777	0.748398	0.823012	0.129574	0.523467
		1.29349	1.26065	0.925405	0.710924	0.934758	0.718109	0.158742	0.489879
		1.48385	1.10048	0.833944	0.8434	0.842372	0.548892	0.103032	0.439572
		1.72839	1.4385	0.515533	0.925321	0.520743	0.934673	0.039657	0.730932
		1.67334	1.64329	0.923451	0.885791	0.932784	0.704011	0.113578	0.605032
		1.89667	1.17402	0.824634	0.823236	1.136	0.536842	0.293674	0.632594
		1.56998	1.16738	0.676833	0.980942	0.683673	0.590115	0.321282	0.472475
		1.67404	1.8811	0.74692	0.735773	0.047394	0.743209	0.223438	0.981489
		1.59399	1.76347	0.92539	0.958109	0.934743	0.967792	0.111654	0.447532
		1.87388	1.54301	0.683717	0.859154	0.690627	0.362784	0.305594	0.355654
		1.52649	1.94375	0.740994	0.841419	0.748483	0.849923	0.845853	0.743589
		1.57491	1.54375	0.90251	0.839029	1.01264	0.847509	0.392265	0.51429
		1.94374	1.76403	0.727569	0.826319	0.734922	0.83467	0.083743	0.498981
		1.48304	1.73498	0.625519	0.765746	0.934873	0.947578	0.938558	0.848302
		1.24898	1.00959		0.977505	0.619463	1.19288	0.106583	0.712151
		1.45385	1.03464		0.793855	1.08333	0.773485	0.192034	0.846584
		1.35478	1.25993			0.783478	0.710892	0.372864	0.747482
		1.21286	1.35249			0.606478	0.483754	0.215743	0.902834
		1.89448	1.38744			0.593382	0.557025	0.192564	0.336465
		1.59639	1.67472			0.485382	0.487674	0.048843	0.832637
		1.29296	1.19311			0.435467		0.083578	0.965742
		1.07884	0.893675			0.632758		0.051493	0.398252
		0.843743	1.05863			0.934981		0.225463	0.682043
		1.57436	1.27484					0.581564	0.748743
		1.18464	1.20153					0.158463	1.1549
		0.893875	1.39484						0.354458
		1.5638	1.60367						0.837132
		1.26556	0.946873						0.473784
		1.40964	1.73278						0.239487
		1.52385	0.925789						0.916651
		0.845325	1.45893						0.463829
		1.13589	1.04802						0.373302
		1.14795	1.14545						0.823743
		1.0893	1.26909						0.548378
		1.48538	1.37694						0.287376
		0.845645	1.18486						0.192875
		0.956465	0.823534						0.102643
		1.05846	1.07498						0.789758
		1.02579	1.20348						0.593854
		1.54822	1.25949						0.340674
		1.2547							0.984279
		1.12527							0.203578
									0.265026
									0.392749
									0.852754
									0.485988
