# Supplementary material for: Control of endothelial cell polarity and sprouting angiogenesis by non-centrosomal microtubules
Source: eLife. 2018 Mar 16;7:e33864. doi: 10.7554/eLife.33864 (PMC5898915; doi:10.7554/eLife.33864)
Supplement: Figure 8—figure supplement 1—source data 1. [file elife-33864-fig8-figsupp1-data1.xlsx]

## Sheet: Figure 8 Figure Supplement1
Figure 8 Figure Supplement 1		Protrusion number							Longest protrusion length
Protrusion parameters									(μm)
		CTL siRNA	MMG siRNA	CAMSAP2 siRNA	CTL siRNA	MMG siRNA	CAMSAP2 siRNA		CTL siRNA	MMG siRNA	CAMSAP2 siRNA	CTL siRNA	MMG siRNA	CAMSAP2 siRNA
		Non treated	Non treated	Non treated	Centrinone	Centrinone	Centrinone		Non treated	Non treated	Non treated	Centrinone	Centrinone	Centrinone
		2	3	5	2	2	3		54.8896	43.5663	39.2825	48.741	61.1711	39.4746
		2	4	3	3	2	2		30.4049	57.3877	41.2236	43.758	33.958	79.0198
		3	2	3	2	2	2		64.0141	58.1259	28.8159	44.187	46.7448	80.9711
		3	3	4	3	2	3		60.6563	29.3849	38.3737	35.046	49.7851	79.8531
		3	2	4	3	2	2		23.3864	116.187	23.7095	126.06	59.0443	40.1801
		2	2	4	3	3	2		27.3821	67.1005	42.6825	79.035	29.4367	61.6889
		3	2	4	2	2	3		43.1848	59.069	41.2236	39.501	40.4382	33.0429
		2	2	3	3	2	3		68.8278	60.3405	20.5557	53.724	39.0822	76.4382
		2	2	5	2	3	2		43.2439	46.6339	38.7014	58.509	88.6251	49.7775
		3	2	3	2	2	2		43.461	67.9071	23.5851	66.297	35.9716	42.178
		4	3	4	2	3	2		42.0291	37.2913	30.8246	36.135	56.8214	29.5769
		2	3	3	3	2	3		46.5346	28.6948	35.05	54.615	29.4644	42.0968
		3	2	4	2	2	2		27.5623	39.7168	24.3395	57.981	20.988	46.2119
		2	3	4	2	3	2		44.1289	35.4578	21.3992	55.374	55.3859	27.06
		3	3	3	3	3	2		53.2079	112.431	21.6497	43.6663	54.908	85.0126
		2	2	3	3	4	3		42.4727	51.711	20.5263	57.7952	27.3026	51.9737
		2	2	3	2	4	2		66.2729	47.256	31.3239	41.9555	63.559	46.2426
		2	3	3	2	3	2		76.0719	57.09	17.5148	38.1219	44.5807	52.4773
		2	2	4	3	3	4		97.4596	65.142	31.0708	34.5256	88.5974	40.6382
		2	2	2	2	3	2		32.6832	36.762	42.5073	36.0667	35.1493	62.1538
		2	3	4	2	2	5		32.4713	32.571	44.2065	21.3253	43.1643	59.5036
		3	3	4	2	2	2		23.1023	45.045	44.2616	74.9516	52.8845	39.3047
		3	3	3	2	3	3		38.4843	77.418	22.8842	50.8715	70.583	38.7001
		4	3	3	3	3	2		22.2278	45.474	31.976	47.1115	49.0637	60.5349
		2	3	5	3	3	2		68.3229	48.84	37.6174	50.1989	44.8242	48.8723
		2	2	3	3	3	2		51.7849	40.788	42.1004	43.696	62.4634	44.3834
		4	2	3	3	2	2		70.4197	35.376	22.9225	87.3223	57.9196	46.9075
		2	2	4	3	2	4		36.7501	65.406	36.5825	53.0016	46.1363	54.4249
		2	3	5	2	2	2		41.6638	32.505	29.3552	35.0048	47.1484	51.6585
		2	2	4	2	2	3		42.5954	53.592	34.0811	50.6151	72.6188	36.4498
		2	2	3	3	2	3		36.3059	38.445	38.3156	66.8003	23.7646	21.4121
		2	2	4	2	2	3		83.3587	49.401	47.8124	38.4176	45.041	45.2113
		2	2	3	2	2	2		43.391	62.799	43.2049	104.339	46.5953	40.4719
		2	3	4	2	2	3		32.0149	31.053	39.9082	34.686	51.3358	44.2768
		2	3	5	3	2	3		57.8441	64.383	35.1793	58.6044	62.7634	36.6317
		4	3		2	4	3		37.4081	49.6099		88.1272	47.4982	29.4588
		2			2		2		64.8434			42.5099		50.1871
		2			2		3		38.0318			71.3143		74.8605
		4					2		33.3366					49.4581
		3							53.8062
		3							46.9494
		4							43.5613
		3							84.1992
		2							51.1031
