# Supplementary material for: Control of endothelial cell polarity and sprouting angiogenesis by non-centrosomal microtubules
Source: eLife. 2018 Mar 16;7:e33864. doi: 10.7554/eLife.33864 (PMC5898915; doi:10.7554/eLife.33864)
Supplement: Figure 8—source data 1. [file elife-33864-fig8-data1.xlsx]

## Sheet: Figure 8A
Figure 8A
Proportion of non radial MT network		CTL siRNA	MMG siRNA	CAMSAP2 siRNA	CTL siRNA	MMG siRNA	CAMSAP2 siRNA
(%)		Non treated	Non treated	Non treated	Centrinone	Centrinone	Centrinone
		13.0497	15.0238	4.55152	18.6456	28.6997	24.4154
		25.0254	7.52662	6.69883	18.4524	20.6584	25.1759
		10.6372	26.0723	6.84135	24.0076	18.8464	26.3745
		6.38825	20.7223	8.7002	14.4542	17.9714	21.3101
		15.4398	10.0104	4.96037	15.185	24.1593	20.4368
		16.8993	9.10498	6.00469	19.4878	17.5401	20.1352
		8.28031	25.6981	8.77036	22.3157	20.4336	13.6364
		13.5795	10.9243	7.80047	24.7722	26.4992	16.8536
		9.01205	12.2153	7.85427	16.697	16.8634	17.3899
		30.4644	10.6079	5.24097	28.1371	16.9578	19.83
		14.8186	14.9814	9.71194	24.7993	12.2699	15.4617
		28.1814	19.0484	6.12783	20.0949	10.4352	22.9312

## Sheet: Figure 8B
Figure 8B
Polarity index		CTL siRNA	MMG siRNA	CAMSAP2 siRNA	CTL siRNA	MMG siRNA	CAMSAP2 siRNA
		Non treated	Non treated	Non treated	Centrinone	Centrinone	Centrinone
		0.792771	0.547481	0.405638	0.586896	0.794769	0.134586
		0.313293	0.230056	0.343084	0.607062	0.758332	0.741944
		0.692295	0.697613	0.298975	0.295366	0.530051	0.575042
		0.363283	0.722947	0.263707	0.310454	0.688561	0.654718
		0.486187	0.973335	0.502212	0.413866	0.267291	0.137377
		0.383115	0.920358	0.497892	0.735746	0.305955	0.896912
		0.660589	0.535606	0.325641	0.904154	0.5734	0.589154
		0.527265	0.397043	0.166006	0.67224	0.792788	0.665875
		0.811299	0.483422	0.319546	0.949407	0.878066	0.380722
		0.285596	0.895853	0.306633	0.831511	0.709431	0.576196
		0.795972	0.382295	0.190386	0.630253	0.340652	0.770766
		0.762585	0.368167	0.812248	0.653354	0.328137	0.714094
		0.214159	0.3411	0.216479	0.699294	0.644257	0.587548
		0.620366	0.406068	0.455716	0.817764	0.449281	0.178283
		0.299228	0.555934	0.597478	0.675976	0.133064	0.885306
		0.43669	0.357212	0.565083	0.732621	0.553663	0.117758
		0.794137	0.853917	0.269677	0.873368	0.646652	0.712338
		0.934022	0.800941	0.331724	0.784361	0.208931	0.881821
		0.249624	0.872935	0.138354	0.347312	0.806332	0.884941
		0.779984	0.671133	0.211342	0.428212	0.680162	0.649513
		0.370151	0.374286	0.341498	0.551539	0.476133	0.623873
		0.402642	0.507984	0.209562	0.616978	0.481779	0.356487
		0.649552	0.621141	0.373974	0.894725	0.638949	0.225309
		0.728444	0.187876	0.0707275	0.162207	0.845368	0.299994
		0.63319	0.849479	0.815338	0.531998	0.568628	0.696532
		0.855229	0.788675	0.451172	0.356404	0.426925	0.794154
		0.724805	0.477501	0.330602	0.738957	0.737946	0.412766
		0.260181	0.959868	0.459587	0.642485	0.430634	0.570324
		0.239628	0.732586	0.267613	0.561676	0.641371	0.367343
		0.899829	0.937209	0.376561	0.722384	0.908551	0.670639
		0.786117	0.72772	0.0450569	0.788489	0.52748	0.248601
		0.927771	0.535158	0.350825	0.523593	0.295279	0.471884
		0.444125	0.814333	0.191519	0.409451	0.704475	0.461728
		0.651886	0.654239	0.288932	0.253437	0.844031	0.665864
		0.77046	0.822289	0.19779	0.290786	0.881561	0.304505
		0.350602	0.876335		0.196031	0.531095	0.582033
		0.87072			0.437816		0.694338
		0.629443			0.701942		0.357183
		0.423251					0.573751
		0.732663
		0.825527
		0.330095
		0.932925
		0.63443

## Sheet: Figure 8C
Figure 8C
CAMSAP2 enrichment		at Golgi		in the longest protrusion
(Fold enrichment)		CTL siRNA	MMG siRNA	CTL siRNA	MMG siRNA
		Centrinone	Centrinone	Centrinone	Centrinone
		3.06043	1.08336	2.29713	3.1731
		2.35975	0.879355	1.42438	1.23717
		2.7034	1.10833	1.69296	1.44993
		1.45922	1.04247	1.76562	1.78074
		1.92348	1.90113	2.77353	1.75891
		1.37595	1.08975	2.77892	1.58672
		1.19009	1.19152	5.78603	3.84463
		1.24796	1.24806	1.25302	2.89054
		1.38254	1.13508	2.37677	2.1461
		2.22478	0.706232	4.12067	0.98181
		4.32996	0.837807	2.21096	1.20684
		3.63504	1.0142	1.68434	2.57015
		3.33859	1.06419	1.9343	1.98278
		2.8225	0.507026	3.15929	1.82512
		4.56151	0.652072	1.75576	1.03074
		1.38163	0.791232	2.77769	1.92679
			0.742175		2.75331
			0.70289		1.40654

## Sheet: Figure 8D
Figure 8D
α-tubulin enrichment in		CTL siRNA	MMG siRNA	CAMSAP2 siRNA	CTL siRNA	MMG siRNA	CAMSAP2 siRNA
the longest protrusion		Non treated	Non treated	Non treated	Centrinone	Centrinone	Centrinone
(Fold enrichment)		2.14797	1.14306	1.72961	1.49128	2.01685	1.65647
		1.26118	1.25018	1.2978	1.58006	2.24023	1.05496
		1.74777	2.03388	0.913105	1.62827	0.914682	1.50342
		1.27677	1.19695	1.33324	1.35947	1.24745	1.01712
		1.05858	1.24721	1.55343	1.24281	1.86087	1.4985
		1.08731	1.30353	1.0556	0.990747	1.46568	1.05955
		2.08594	1.11376	1.26273	3.99967	1.58202	1.17537
		0.423597	1.32474	0.630108	1.23441	1.11072	1.22157
		1.61919	1.01069	0.897412	2.27653	1.29577	1.20204
		1.15677	1.96689	1.17952	1.23635	2.02147	1.83358
		1.03281	2.78895	1.29915	3.35695	1.99792	0.986163
		1.4134	1.93768	0.983278	1.63628	2.16947	1.36716
		1.12174	1.18283	0.84911	0.932891	1.1598	1.22881
		1.36242	1.3388	1.11591	2.27871	1.22645	1.01781
		1.55169	1.10871	1.14425	1.5265	0.909682	1.96132
		0.835605	1.83046	0.71746	2.08811	1.08505	1.13846
		0.988648	1.36013	0.942829	1.21575	1.57847	1.12466
		2.09073	0.950973	0.650392	1.48936	1.19205	1.20025
		1.3722	0.808303	1.2295	1.73816	1.28586	0.994618
		1.51366	1.34392	0.848746	2.1458	1.2815	1.62552
		1.39645	0.906105	1.20169	1.58263	1.31348	1.36144
		1.50872	1.08479	0.879847	1.47021	1.4018	1.17692
		2.10604	0.867157	1.00825	1.43886	1.44553	1.71771
		1.63592	2.32378	0.956502	1.10158	1.50464	1.05278
		2.8448	1.63919	1.0363	1.16432	1.2424	1.11238
		1.25686	1.20265	1.06336	1.77476	1.79419	1.47472
		2.53142	1.361	0.849154	1.08048	2.4116	1.72693
		1.32424	1.03039	1.92231	1.74303	1.75042	1.38377
		1.42197	1.18107	0.78652	1.44153	1.66377	1.63249
		0.926755	2.25757	2.01484	1.51844	0.901591	1.30228
		0.974738	1.47408	1.31153	1.72194	1.42251	1.18533
		1.87777	1.47669	1.15216	3.20686	1.46382	1.33508
		0.938658	1.71419	1.28171	1.18151	2.11387	2.13252
		1.77075	1.21399	1.01602	1.26579	1.22531	3.28517
		1.61877	1.16278	1.14914	2.08326	0.924876	1.60673
		1.70524	1.43003	1.15084	0.863776	1.73686	1.67965
