# Supplementary material for: Control of endothelial cell polarity and sprouting angiogenesis by non-centrosomal microtubules
Source: eLife. 2018 Mar 16;7:e33864. doi: 10.7554/eLife.33864 (PMC5898915; doi:10.7554/eLife.33864)
Supplement: Figure 9—figure supplement 1—source data 1. [file elife-33864-fig9-figsupp1-data1.xlsx]

## Sheet: Figure 9 Figure Supplement 1B
Figure 9 Figure Supplement 1B
mRNA Expression of exon2 of CAMSAP2
(Fold change to control)		CTL Mo	CAMSAP2b Mo
		1	0.378842
		1	0.385285
		1	0.335565

## Sheet: Figure 9 Figure Supplement 1D
Figure 9 Figure Supplement 1D		at 34hpf			at 41 hpf			at 41 hpf
Number of secondary sprout					all sprouts			fused sprouts
(number per embryo)		CTL Mo	CAMSAP2b Mo		CTL Mo	CAMSAP2b Mo		CTL Mo	CAMSAP2b Mo
		2	0		5	4		4	2
		3	0		6	5		4	3
		1	0		3	7		3	3
		2	0		8	7		3	4
		3	0		5	6		4	4
		2	1		6	3		2	1
		3	1		3	5		3	1
		3	1		5	5		3	2
		1	1		8	7		4	5
		2	0		5	6		4	3
		2	0		8	7		4	3
		2	1		4	4		3	1
		0	2		6	4		4	1
		2	1		8	5		7	1
		4	1		5	3		3	3
		1	2		6	5		6	2
		0	0		7	6		5	2
		2	2		5	4		4	3
		1	1		6	3		3	3
		1	1		5	2		4	1
		2	1		7	3		5	2
		2	0		6	5		4	2
		1	1		5	4		3	2
		1	1		6	6		3	3
		2	1		4	5		4	3
		4	0		4	5		4	1
		0	3		7	4		2	1
		3	2		6	3		5	1
		0	2		7	4		5	2
		2	0		5	1		4	0
		1	1		4	2		4	2
		0	2		6	3		6	3
		2	0		4	7		4	5
		4	1		3	3		3	3
		3	1		4	2		4	0
		3	2		5	5		5	0
		0	0		7	4		5	4
		3	1		2	1		0	1
		1	1		4	5		4	0
		0	0		5	3		4	2
		2	2		5	1		5	0
		4	0		2			1
		1	2
		3	0
		2	0
		7	1
		3	1
		3	2
		6	0
		3	0
		5	3
		5	1
		1	0
		4	0
		3	0
		3	0
		2
		4
		2
		2
		4
		3
		3
		2

## Sheet: Figure 9 Figure Supplement 1F
Figure 9 Figure Supplement 1F
Number of secondary sprout at 36 hpf		CTL Mo	CAMSAP2b Mo	Rescue
(Number per embryo)		2	0	0
		4	2	4
		1	2	1
		0	1	1
		1	0	2
		3	0	3
		3	2	1
		5	0	4
		2	0	1
		1	1	2
		0	0	2
		3	0	0
		2	3	2
		1	1	2
		3	1	0
		0	0	2
		3	0	3
		2	0	4
		2	0	3
		0	0	1
		1	0	1
		3	2	2
		4	0	2
		6	4	4
		1	1	0
		7	3	4
		4	4	3
		3	0	2
		4	2	1
		4	3	4
		2	0
		6	2
		2	4
		6	0
		2	1
		4	1
		3	2
		2	2
		3	1
		2	2
		3	1
		2	1

## Sheet: Figure 9 Figure Supplement 1G
Figure 9 Figure Supplement 1G
Number of loop in the caudal vein plexus		CTL Mo	CAMSAP2b Mo
(Number per embryo)		5	18
		4	1
		12	12
		5	3
		10	11
		6	4
		4	1
		5	0
		4	3
		7	3
		11	5
		8	7
		7	3
		12	4
		14	3
		8	8
		14	8
		12	11
		17	2
		12	7
		9	5
		6	8
		11	1
		12	11
		8	4
		15	7
		10	5
		11	5
		8	8
		5	7
		10	7
		6	13
		7	1
		11	10
		5	5
			7
			2
			3
			8
			11
			0
