# Supplementary material for: Control of endothelial cell polarity and sprouting angiogenesis by non-centrosomal microtubules
Source: eLife. 2018 Mar 16;7:e33864. doi: 10.7554/eLife.33864 (PMC5898915; doi:10.7554/eLife.33864)
Supplement: Figure 9—source data 1. [file elife-33864-fig9-data1.xlsx]

## Sheet: Figure 9B
Figure 9B
Proportion of venous intersegemental vessels
(%)		CTL Mo	CAMSAP2b Mo	Rescue
		40	30	40
		70	20	50
		44.4444	30	20
		40	10	40
		40	30	0
		50	0	30
		50	30	40
		50	20	40
		40	40	20
		40	30	50
		40	0	20
		60	20	40
		50	50	44.4444
		50	10	20
		50	0	40
		60	10	20
		60	20	20
		44.4444	10	40
		70	30	30
		50	50	50
		70	66.6667	30
		50	30	70
		60	40	20
		60	33.3333	70
		50	20	60
		60	50	40
		40	40	33.3333
		60	10	40
		50	50	30
		60	0	50
		50	20	40
		60	10	60
		50	30	40
		30	0	50
		60	30	50
		50	40	60
		50	10	60
		40	55.5556	0
		40	20	30
		50	30	30
		50	20	40
		40	30	40
		50	30	40
		30	10	40
		50	0	60
		50	20
		40	36.3636
		50	22.2222
		40	54.5455
		55.5556	33.3333
		50	0
		40	40
		30	22.2222
		50	40
		50	50
		44.4444	40
		30	40
		45.4545	44.4444
		50	30
		55.5556	40
		50	44.4444
		50	10
		50	40
		60	40
		45.4545	40
		50	50
		40	10
		40	0
		44.4444	55.5556
		50	0
		44.4444	10
		40	10
		60	10
		50	20
		55.5556	0
		55.5556	20
		55.5556	20
		55.5556	60
		66.6667	40
		50	50
		50
		37.5
		33.3333
		50
		40
		70
		60
		66.6667
		60
		70

## Sheet: Figure 9D
Figure 9D
Venous sprout growth curves
(μm vs h)	CTL Mo	12.343	5.628	12.867	7.84567	11.7333	2.18933	5.831	7.145	10	9.244	8.85367	8.44267	5.95133	6.45433	6.98233	8.282	9.35167	5.79	9.87067
		12.343	12.652	16.255	9.317	14.909	6.68533	7.45367	7.48133	9.20467	14.5333	12.56	8.497	7.82	6.84633	10.0243	7.94	6.76633	9.27833	10.7337
		16.1367	15.753	15.0923	11.0807	15.5893	6.534	9.47667	7.70367	8.20233	17.4363	13.1997	12.1313	13.6197	9.94533	9.98433	10.1637	13.9233	8.81633	16.523
		19.3167	16.4967	19.8213	14.191	16.3113	6.83333	10.7497	8.65467	7.03967	14.5163	19.469	19.3737	12.251	9.38467	12.3457	10.9063	16.9237	9.51767	20.0453
		20.0753	15.8003	19.9777	16.604	19.3513	7.45367	12.0187	9.18967	8.012	17.3763	21.0247	24.567	13.9003	9.628	17.3607	13.204	19.3593	12.4063	18.4363
		25.544	16.3463	18.443	16.7707	18.8693	9.453	12.0703	10.3953	9.11733	20.7787	23.5817	24.2613	10.723	7.99233	17.4363	11.8107	20.648	14.0383	19.763
		27.535	20.2393	20.1797	15.303	19.7237	9.66667	12.912	10.372	10.616	21.712	23.5413	30.3297	13.142	8.58067	17.9527	10.9063	26.0217	11.604	21.703
		31.7847	17.7697	17.817	13.4217	19.5577	8.66833	12.0393	9.049	9.70633	22.739	25.3113	32.3157	15.7013	10.448	18.9427	13.0863	23.368	9.887	21.892
		37.0713	18.0267	19.7117	17.1027	18.204	8.55867	11.3297	8.33067	11.1637	26.7613	29.5483	32.726	17.3353	11.4433	17.804	15.0707	23.079	13.7383	20.407
		37.698	18.523	20.4423	16.568	19.934	8.34833	12.693	9.019	13.5113	26.3617	27.9393	33.899	16.4347	14.3353	18.473	13.4207	23.2113	13.1287	24.4363
		34.7367	17.5493	20.1383	17.2063	20.6727	8.17467	12.0933	7.98633	14.1063	28.1497	32.6493	37.4787	16.5037	14.5153	18.335	13.5697	22.739	14.937	22.9497
		36.1207	17.4627	23.214	18.5187	20.336	8.83333	12.0187	8.29567	14.127	27.6483	38.7733	39.2637	15.8413	16.6017	20.83	11.2633	29.7463	15.921	20.636
		34.5647	15.9853	28.9387	21.334	21.1113	10.2537	14.837	9.135	14.3317	25.4213	39.2853	39.272	23.3767	22.1333	19.3317	12.609	31.0737	14.506	21.6667
		36.4443	14.33	32.7957	24.793	23.714	10.919	14.3797	9.68433	15.42	26.668	39.2853	41.5077	27.0287	21.0777	18	10.1093	36.451	18.255	22.1677
		34.676	13.2697	29.886	23.112	24.0283	10.049	17.4683	10.6623	14.512	27.3387	39.2853	40.4667	27.915	21.0777	23.4203	11.8173	31.7453	16.0287	26.9337
		40.7323	16.4267	29.725	22.4227	24.2957	10.7213	20.2677	11.865	13.3013	35.2283	39.2853	44.5167	28.0933	21.0777	26.9787	19.749	40.7137	13.7597	28.6237
		40.9397	18.6927	27.211	24.8417	23.8777	11.316	20.2677	13.6477	12.6723	36.5807	39.2853	45.6127	30.803	21.0777	29.7833	15.8727	42.554	19.6187	33.746
		42.528	20.133	28.176	24.4597	24.0283	12.194	20.2677	15.438	13.6133	40.6347	39.2853	49.839	32.1003	21.0777	33.7953	12.7007	44.3793	19.9493	33.746
		44.9203	23.358	29.8143	25.0257	25.1087	12.531	20.2677	16.7517	13.6133	45.672	39.2853	47.933	27.363	21.0777	33.069	14.002	49.0903	22.6727	33.746
		51.088	23.2097	37.2633	27.57	23.7813	11.844	20.2677	16.0233	13.6133	45.7967	39.2853	47.933	29.777	21.0777	34.8007	12.1617	47.425	22.6727	33.746
		49.549	24.198	41.123	29.7177	24.0283	11.0817	20.2677	16.3453	13.6133	45.7967	39.2853	47.933	28.8873	21.0777	34.8007	12.9153	51.6673	22.6727	33.746
		47.912	23.8197	39.0923	29.6017	23.6703	10.431	20.2677	18.3277	13.6133	45.7967	39.2853	47.933	28.3117	21.0777	34.8007	13.8227	50.0377	22.6727	33.746
		50.2757	21.668	37.755	29.6017	24.359	11.494	20.2677	19.481	13.6133	45.7967	39.2853	47.933	30.111	21.0777	34.8007	11.542	50.0377	22.6727	33.746
		48.0873	20.887	43.2923	29.6017	25.4317	14.8783	20.2677	21.1743	13.6133	45.7967	39.2853	47.933	28.181	21.0777	34.8007	8.601	50.0377	22.6727	33.746
		49.418	20.032	41.1693	29.6017	28.461	14.3577	20.2677	22.9587	13.6133	45.7967	39.2853	47.933	34.2843	21.0777	34.8007	9.414	50.0377	22.6727	33.746
		57.4047	18.3333	40.5573	29.6017	26.4053	13.0437	20.2677	24.3303	13.6133	45.7967	39.2853	47.933	32.463	21.0777	34.8007	15.2343	50.0377	22.6727	33.746
		54.39	22.4003	42.4213	29.6017	27.415	14.9463	20.2677	25.0203	13.6133	45.7967	39.2853	47.933	35.7443	21.0777	34.8007	14.14	50.0377	22.6727	33.746
		55.31	23.005	44.4533	29.6017	26.4597	16.5	20.2677	24.6037	13.6133	45.7967	39.2853	47.933	34.3383	21.0777	34.8007	19.335	50.0377	22.6727	33.746
		53.369	26.5643	45.4863	29.6017	26.7213	14.7317	20.2677	26.0083	13.6133	45.7967	39.2853	47.933	34.3383	21.0777	34.8007	18.6337	50.0377	22.6727	33.746
		55.8747	23.8357	49.164	29.6017	26.5707	14.202	20.2677	26.0637	13.6133	45.7967	39.2853	47.933	34.3383	21.0777	34.8007	18.0867	50.0377	22.6727	33.746
		55.8747	24.614	49.164	29.6017	26.1943	15.356	20.2677	25.6183	13.6133	45.7967	39.2853	47.933	34.3383	21.0777	34.8007	21.1083	50.0377	22.6727	33.746
		55.8747	23.416	49.164	29.6017	26.1943	17.0293	20.2677	25.6183	13.6133	45.7967	39.2853	47.933	34.3383	21.0777	34.8007	22.5057	50.0377	22.6727	33.746
		55.8747	22.5373	49.164	29.6017	28.7543	18.4813	20.2677	25.6183	13.6133	45.7967	39.2853	47.933	34.3383	21.0777	34.8007	22.571	50.0377	22.6727	33.746
		55.8747	28.4143	49.164	29.6017	28.6357	18.8803	20.2677	25.6183	13.6133	45.7967	39.2853	47.933	34.3383	21.0777	34.8007	26.618	50.0377	22.6727	33.746
		55.8747	27.741	49.164	29.6017	27.8787	18.5607	20.2677	25.6183	13.6133	45.7967	39.2853	47.933	34.3383	21.0777	34.8007	25.322	50.0377	22.6727	33.746
		55.8747	26.4003	49.164	29.6017	27.486	16.5627	20.2677	25.6183	13.6133	45.7967	39.2853	47.933	34.3383	21.0777	34.8007	24.15	50.0377	22.6727	33.746
		55.8747	30.811	49.164	29.6017	29.163	16.5413	20.2677	25.6183	13.6133	45.7967	39.2853	47.933	34.3383	21.0777	34.8007	24.15	50.0377	22.6727	33.746
		55.8747	42.908	49.164	29.6017	29.338	16.9157	20.2677	25.6183	13.6133	45.7967	39.2853	47.933	34.3383	21.0777	34.8007	24.15	50.0377	22.6727	33.746
		55.8747	45.5527	49.164	29.6017	30.1797	17.0987	20.2677	25.6183	13.6133	45.7967	39.2853	47.933	34.3383	21.0777	34.8007	24.15	50.0377	22.6727	33.746
		55.8747	46.1967	49.164	29.6017	28.975	17.0987	20.2677	25.6183	13.6133	45.7967	39.2853	47.933	34.3383	21.0777	34.8007	24.15	50.0377	22.6727	33.746
		55.8747	48.6003	49.164	29.6017	28.7003	17.0987	20.2677	25.6183	13.6133	45.7967	39.2853	47.933	34.3383	21.0777	34.8007	24.15	50.0377	22.6727	33.746
	CAMSAP2b Mo	4.31767	9.49867	7.81567	10.6817	11.2763	8.956	11.116	4.61733	17.1133	9.03433	12.29	8.474	10.1017	6.66667	12.6323	7.80967	11.7517	10.2953
		4.67033	17.5823	9.87533	8.69233	6.41633	9.299	9.09333	8.065	18.6287	1.867	11.46	6.87333	16.2033	7.28267	11.7337	10.3213	10.1017	9.72067
		2.983	9.464	11.2383	11.3203	7.253	13.105	12.9613	12.4003	19.6787	10.6003	13.3193	6.48733	12.0867	11.4737	9.88467	6.792	10.6703	12.6263
		6.82933	22.891	19.1403	5.486	2.357	21.644	17.3457	18.795	18.571	3.33333	12.6963	6.177	11.5113	13.191	9.17533	7.733	8.98433	7.98167
		13.535	14.017	22.4537	12.1793	5.66567	18.956	21.0483	19.776	18.77	18.3333	11.7393	7.19733	10.4367	13.7903	8.248	9.60367	9.69667	8.61867
		12.073	16.8057	19.6057	8.412	4.78167	14.5617	19.2137	21.997	24.0603	15.0727	13.808	3.76733	11.6893	12.1533	8.89967	9.017	5.49867	10.843
		13.0217	14.143	24.5333	12.9043	7.887	20.335	16.604	21.9197	22.4287	16.4907	13.685	5.865	12.233	13.5187	15.4897	12.0643	3.378	9.51033
		15.822	14.9873	28.2307	8.062	3.14667	13.0317	19.358	16.281	25.7733	10.7497	13.0313	5.52733	19.5533	12.6867	9.149	11.23	5.111	9.255
		25.6853	14.9663	24.654	14.0833	5.376	12.6567	14.1407	20.82	22.0127	11.9033	13.2687	5.09667	13.3787	12.3997	11.1663	10.5013	3.75133	10.5117
		22.7703	9.33167	27.374	4.08733	7.52133	9.69833	14.0923	19.5383	20.8293	4.92133	12.7633	8.356	7.98167	15.3023	14.245	9.299	3.57567	6.66667
		27.024	11.145	21.0863	0.0946667	5.44667	16.136	10.2237	21.6413	23.4993	11.382	16.06	5.09667	16.5817	16.399	9.99433	6.59967	2.57833	6.31933
		28.1837	11.145	18.7853	4.76133	4.47233	16.6457	13.2403	23.93	21.8267	12.7263	13.638	6.131	15.0383	15.7167	0.623333	5.842	1.29567	4.99567
		18.0733	12.401	22.2753	12.7537	11.5743	15.0703	12.718	23.3787	26.0187	11.2687	12.6963	6.687	22.5343	14.9547	5.92167	3.77	2.30267	5.17767
		18.0733	12.2317	26.146	10.5127	9.49367	15.0463	12.784	13.5017	21.2793	13.6547	13.7287	6.584	23.9477	15.028	3.33333	7.644	4.349	4.88133
		18.0733	8.56167	27.9987	10.5127	7.50167	18.9477	14.4993	13.302	23.5833	11.6213	13.1573	7.385	23.2813	12.048	0.623333	11.7703	5.27167	4.397
		18.0733	9.464	25.7187	10.5127	3.33433	22.078	13.0217	14.0183	22.8507	14.245	15	7.57467	20.4987	13.285	8.356	6.74167	5.30467	4.25433
		18.0733	10.292	26.6667	10.5127	6.307	24.3573	10.1357	13.454	22.1417	10.7933	8.855	7.642	23.7053	12.1047	15.0727	6.74167	5.20033	6.35367
		18.0733	10.0287	28.976	10.5127	7.511	25.5517	11.9217	11.8107	23.1833	20.0647	9.58	7.47533	24.968	13.218	14.0017	6.74167	7.884	5.71267
		18.0733	8.77	28.2307	10.5127	4.41367	21.0757	12.669	16.1887	23.3893	12.87	12.191	7.933	24.1983	14.7803	8.64833	6.74167	6.15067	4.48467
		18.0733	11.8863	27.9637	10.5127	1.767	18.31	11.336	14.3413	23.658	11.4813	12.191	6.48733	20.2547	15.0927	3.33333	6.74167	3.51267	6.66667
		18.0733	10.8497	33.0427	10.5127	8.69533	18.255	17.1313	17.654	23.6473	17.2113	14.3637	8.391	18.9567	15.314	3.33333	6.74167	7.387	5.772
		18.0733	11.661	28.9	10.5127	8.69533	19.1923	12.3953	12.6667	22.7897	14.2063	12.8867	11.454	22.0563	11.8413	8.89967	6.74167	6.996	4.00367
		18.0733	13.7883	31.5927	10.5127	8.69533	21.4723	19.0937	11.1797	20.801	7.87567	13.685	8.697	20.01	11.5587	15.1793	6.74167	5.49867	4.176
		18.0733	13.7907	27.9327	10.5127	8.69533	18.7853	23.275	17.6827	23.009	15.8827	21.43	7.84533	21.2923	12.8117	15.1793	6.74167	6.66667	3.23167
		18.0733	12.733	27.8043	10.5127	8.69533	19.5767	22.7907	15.2887	22.795	7.00133	15	9.37933	22.637	15.136	15.1793	6.74167	7.50867	3.23167
		18.0733	11.6223	27.8043	10.5127	8.69533	26.2	22.154	13.2373	22.1803	10.9963	14.566	7.71133	22.637	12.962	15.1793	6.74167	5.758	3.23167
		18.0733	11.453	27.8043	10.5127	8.69533	26.0583	22.0087	13.1033	21.661	10.6003	15.5457	8.178	22.637	14.2067	15.1793	6.74167	7.21233	3.23167
		18.0733	11.8747	27.8043	10.5127	8.69533	30.8647	22.0347	9.957	21.5513	7.832	9.76367	8.56967	22.637	16.633	15.1793	6.74167	7.72667	3.23167
		18.0733	11.679	27.8043	10.5127	8.69533	28.79	21.8417	9.14133	20.9897	11.4813	9.994	8.1	22.637	16.4757	15.1793	6.74167	8.32333	3.23167
		18.0733	8.571	27.8043	10.5127	8.69533	26.2377	15.822	11.976	20.191	12.1883	11.122	7.586	22.637	16.8037	15.1793	6.74167	6.12867	3.23167
		18.0733	13.6983	27.8043	10.5127	8.69533	28.7087	14.608	6.35867	22.205	10.1853	10.7733	10.398	22.637	15.9197	15.1793	6.74167	7.92133	3.23167
		18.0733	12.8877	27.8043	10.5127	8.69533	27.219	11.302	13.8657	18.154	-2.168	12.2247	9.69767	22.637	16.2353	15.1793	6.74167	7.451	3.23167
		18.0733	12.8877	27.8043	10.5127	8.69533	26.293	18.3863	9.87833	19.1763	1.29467	16.3	9.35333	22.637	16.1743	15.1793	6.74167	7.955	3.23167
		18.0733	12.8877	27.8043	10.5127	8.69533	26.293	14.6803	13.4103	19.977	7.57467	16.2437	13.3803	22.637	17.8967	15.1793	6.74167	8.16567	3.23167
		18.0733	12.8877	27.8043	10.5127	8.69533	26.293	13.2403	11.4883	20.7847	4.96633	15	11.4093	22.637	19.2587	15.1793	6.74167	7.715	3.23167
		18.0733	12.8877	27.8043	10.5127	8.69533	26.293	20.335	14.811	19.3703	11.435	15.415	10.6003	22.637	16.644	15.1793	6.74167	7.34033	3.23167
		18.0733	12.8877	27.8043	10.5127	8.69533	26.293	28.3853	15.5497	17.9153	2.27333	12.1563	9.88467	22.637	18.2593	15.1793	6.74167	6.66667	3.23167
		18.0733	12.8877	27.8043	10.5127	8.69533	26.293	34.126	9.78467	24.786	1.97133	16.952	11.4093	22.637	18.208	15.1793	6.74167	6.66667	3.23167
		18.0733	12.8877	27.8043	10.5127	8.69533	26.293	27.513	9.78467	17.375	5.06467	16.122	6.72533	22.637	17.7887	15.1793	6.74167	8.376	3.23167
		18.0733	12.8877	27.8043	10.5127	8.69533	26.293	23.6667	8.282	15	1.33033	17.4987	0.544667	22.637	18.8577	15.1793	6.74167	6.66667	3.23167
		18.0733	12.8877	27.8043	10.5127	8.69533	26.293	34.1813	8.026	13.3307	4.87833	16.315	7.44633	22.637	21.3537	15.1793	6.74167	6.96967	3.23167
		18.0733	12.8877	27.8043	10.5127	8.69533	26.293	32.921	5.22	11.23	4.60467	12.1563	8.41833	22.637	21.2603	15.1793	6.74167	4.397	3.23167
		18.0733	12.8877	27.8043	10.5127	8.69533	26.293	28.4043	5.22	11.23	2.27333	16.2713	18.3333	22.637	18.7513	15.1793	6.74167	4.93533	3.23167
		18.0733	12.8877	27.8043	10.5127	8.69533	26.293	28.4043	5.22	11.23	5.865	18.864	17.538	22.637	19.333	15.1793	6.74167	3.23167	3.23167
		18.0733	12.8877	27.8043	10.5127	8.69533	26.293	35.1233	5.22	11.23	5.39	15.5787	15.5097	22.637	18.072	15.1793	6.74167	3.23167	3.23167
		18.0733	12.8877	27.8043	10.5127	8.69533	26.293	31.7747	5.22	11.23	4.92133	16.952	2.538	22.637	16.3517	15.1793	6.74167	3.23167	3.23167
		18.0733	12.8877	27.8043	10.5127	8.69533	26.293	32.921	5.22	11.23	3.788	17.0567	16.22	22.637	19.4727	15.1793	6.74167	3.23167	3.23167
		18.0733	12.8877	27.8043	10.5127	8.69533	26.293	33.6603	5.22	11.23	5.19067	15	15.7157	22.637	15.315	15.1793	6.74167	3.23167	3.23167

## Sheet: Figure 9E
Figure 9E
Sprout parameter variation		angle	length	angle	length
		(°)	(μm)
		CTL Mo		CAMSAP2b Mo
		4.368	7.024	-3.085	3.44767
		-1.805	3.101	1.596	4.33533
		-1.133	0.743667	-6.017	6.39467
		3.413	-0.696333	5.599	0.981
		-2.965	0.546	3.332	2.221
		5.102	3.893	0.527	-0.0773333
		-1.418	-2.46967	1.427	-5.63867
		-6.267	0.257	-7.1	4.539
		-1.245	0.496333	-3.876	-1.28167
		2.521	-0.973667	0.255	2.103
		4.802	-0.0866667	0.894	2.28867
		-1.005	-1.47733	0.777	-0.551333
		-0.659	-1.65533	14.32	-9.877
		-5.011	-1.06033	15.056	-0.199667
		-3.111	3.157	-10.732	0.716333
		2.055	2.266	18.726	-0.564333
		-1.495	1.44033	-2.042	-1.64333
		-0.923	3.225	-8.106	4.378
		1.89	-0.148333	-5.103	-1.84733
		-1.206	0.988333	10.413	3.31267
		-0.806	-0.378333	10.827	-4.98733
		4.77	-2.15167	-0.24	-1.487
		-3.228	-0.781	-1.608	6.503
		-1.129	-0.855	-5.927	-2.394
		-3.942	-1.69867	4.954	-2.05133
		0.173	4.067	-14.735	-0.134
		-1.028	0.604667	3.994	-3.14633
		-2.79	3.55933	26.282	-0.815667
		1.289	-2.72867	14.468	2.83467
		0.953	0.778333	-15.849	-5.61733
		-0.122	-1.198	-14.636	7.507
		0.747	-0.878667	-6.883	-3.98733
		-0.595	5.877	-2.391	3.532
		0.368	-0.673333	4.734	-1.922
		0.767	-1.34067	3.867	3.32267
		-0.927	4.41067	0.203	0.738667
		-2.149	12.097	9.56	-5.765
		0.415	2.64467	0	0
		5.376	0.644	-8.581	-1.50267
		0.024	2.40367	3.132	-0.256
				-5.18	-2.806

## Sheet: Figure 9F
Figure 9F		Growth		Direction
Persitence of sprout formation		(μm)
		CTL Mo	CAMSAP2b Mo	CTL Mo	CAMSAP2b Mo
		1.50109	0.541781	21.5689	9.71827
		1.07431	0.413693	26.459	11.8022
		1.25162	0.0146992	17.472	8.56096
		1.036	-0.113724	16.4875	10.1841
		0.390842	0.223063	24.2107	4.69514
		0.304632	0.0932865	24.4906	9.83463
		0.962444	0.0289679	15.7054	8.98126
		0.566978	0.258153	19.1997	6.34307
		1.44998	0.0978421	18.8623	13.7323
		1.49221	-0.150894	19.0265	5.00912
		0.937926	-0.272644	14.5276	8.51718
		1.93743	0.340465	26.9842	14.9803
		0.453371	0.587217	17.7736	14.5078
		1.46412	1.29514	21.7551	13.6076
		1.12487	0.526024	34.1837	9.47641
		0.911536	0.832861	18.7146	11.8315
		2.19391	0.34786	19.2476	7.62855
		2.53597	1.14631	20.9244	5.76212
		0.325567		14.6489
