# Supplementary figures and images for: Control of endothelial cell polarity and sprouting angiogenesis by non-centrosomal microtubules
Source: eLife journal article supplement (doi:10.7554/elife.33864), 2018-03-16

Figure 8 - Figure Supplement 1 Martin et al.

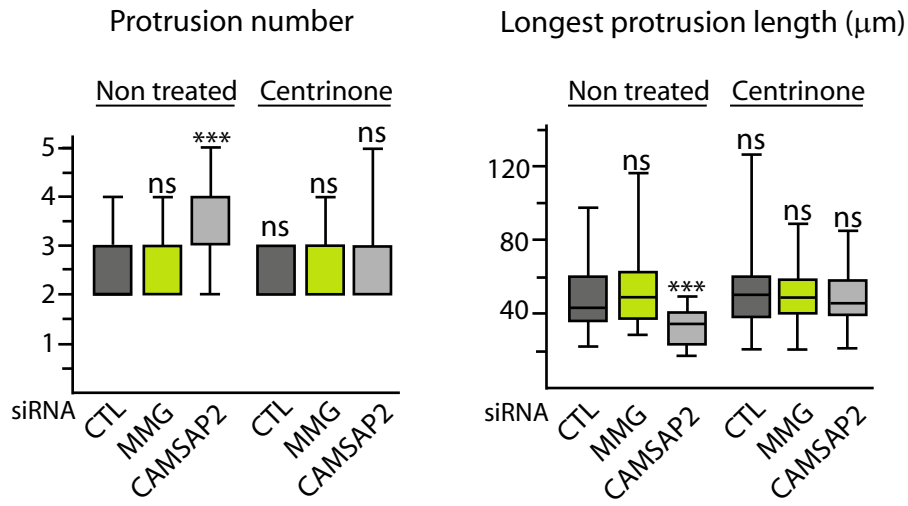

Supplement: supp [file elife-33864-supp-v1.zip]

Figure 4 - Figure Supplement 2 Martin et al.

**A**

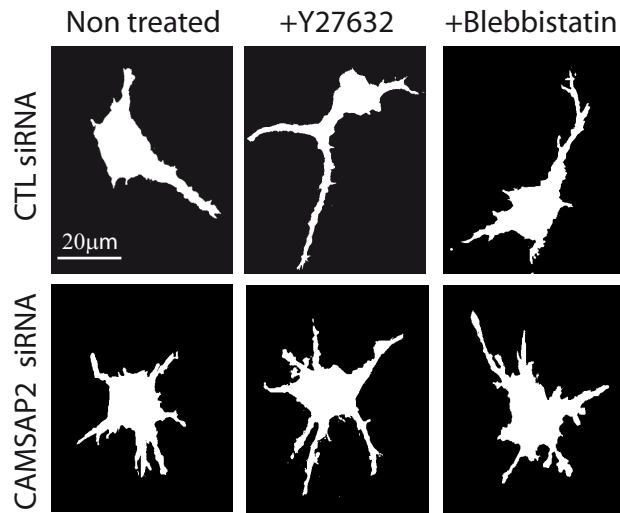

**B**

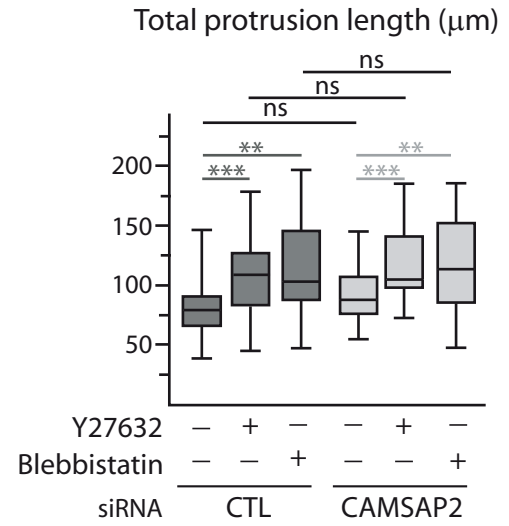

**C**

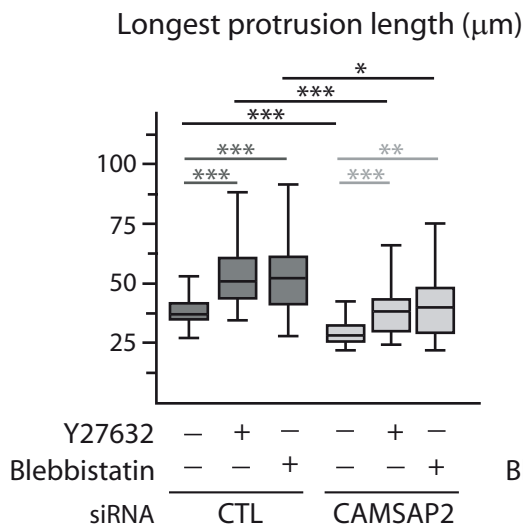

**D**

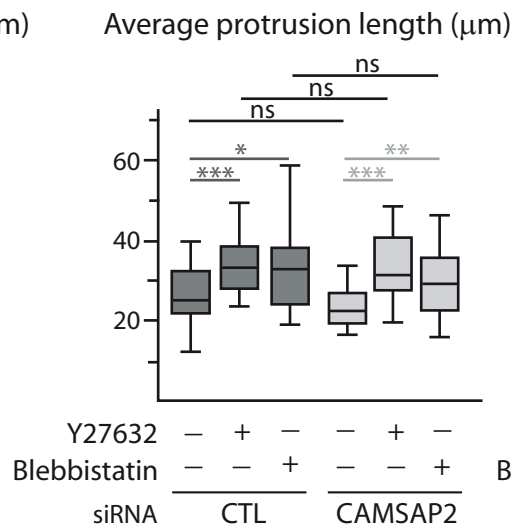

**E**

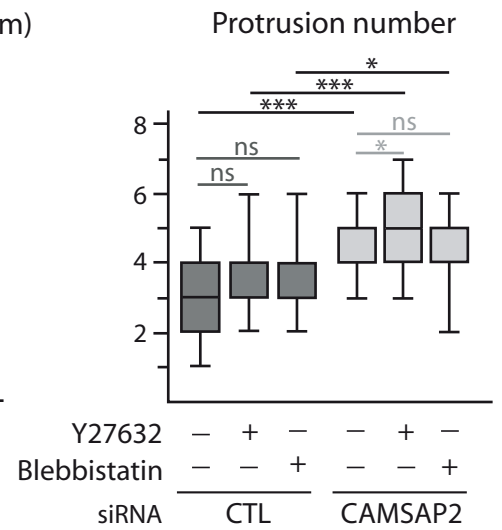

**F**

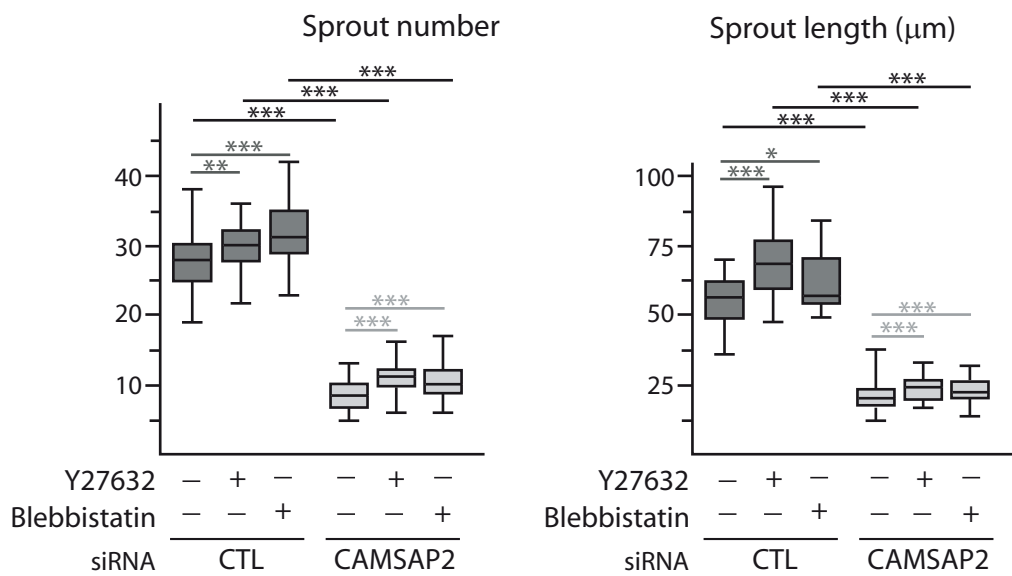

Supplement: supp [file elife-33864-supp-v1.zip]

Figure 2 - Figure Supplement 1 Martin et al.

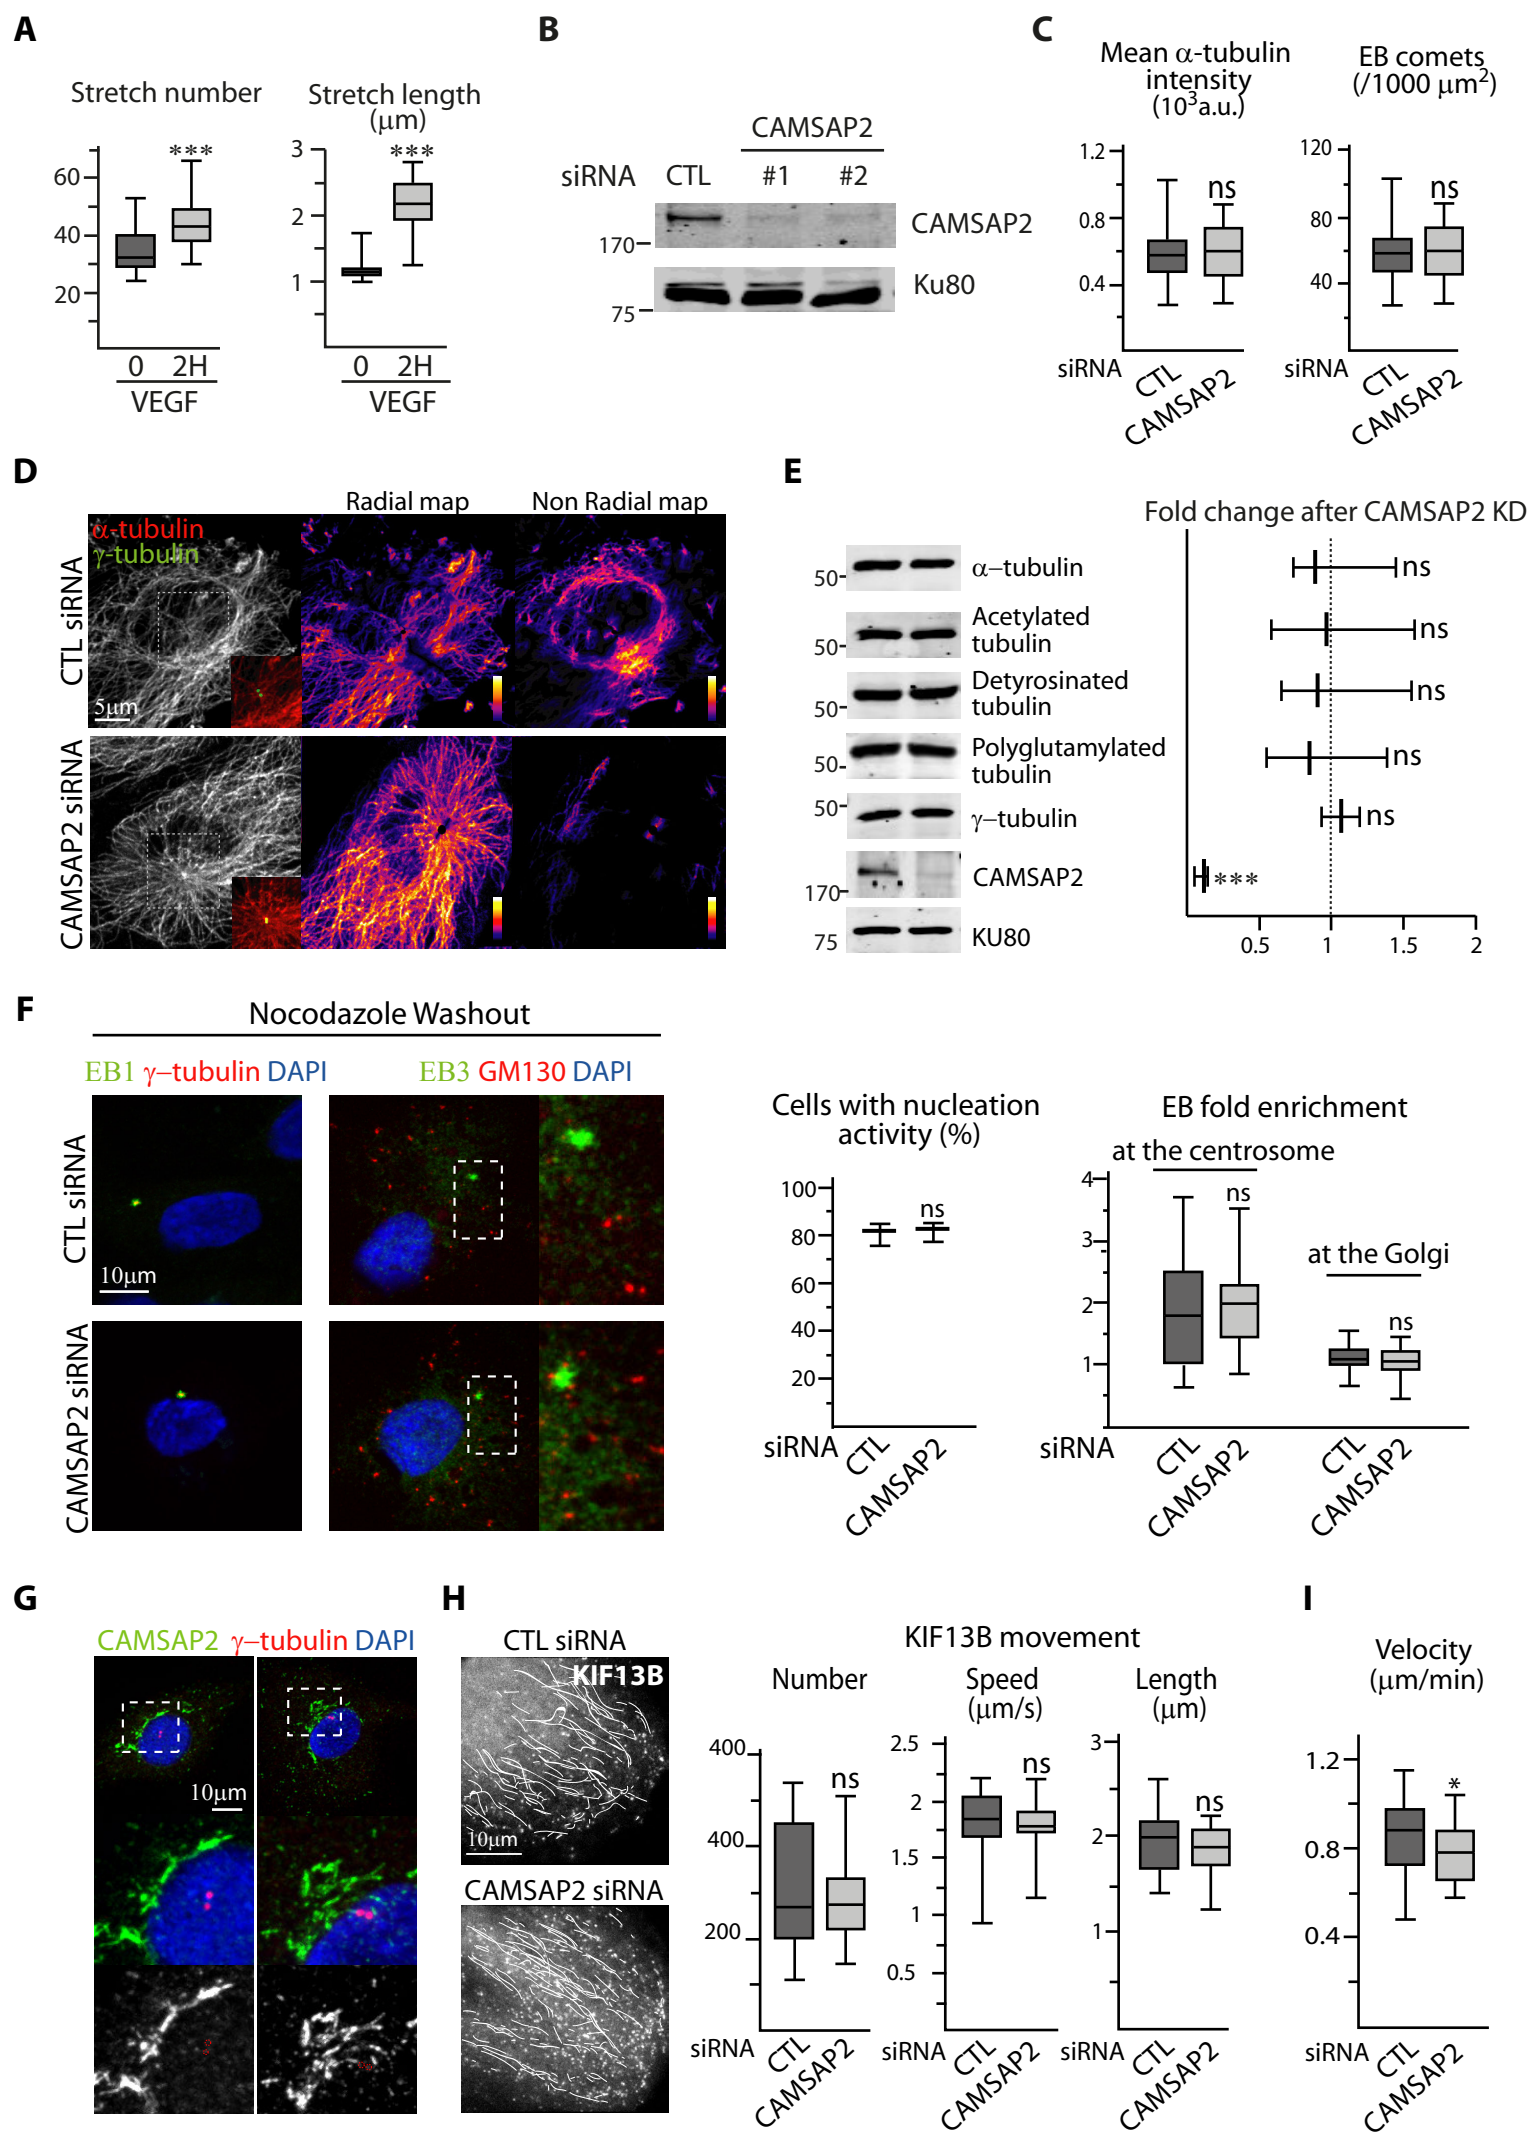

Supplement: supp [file elife-33864-supp-v1.zip]

Figure 6 - Figure Supplement 1 Martin et al.

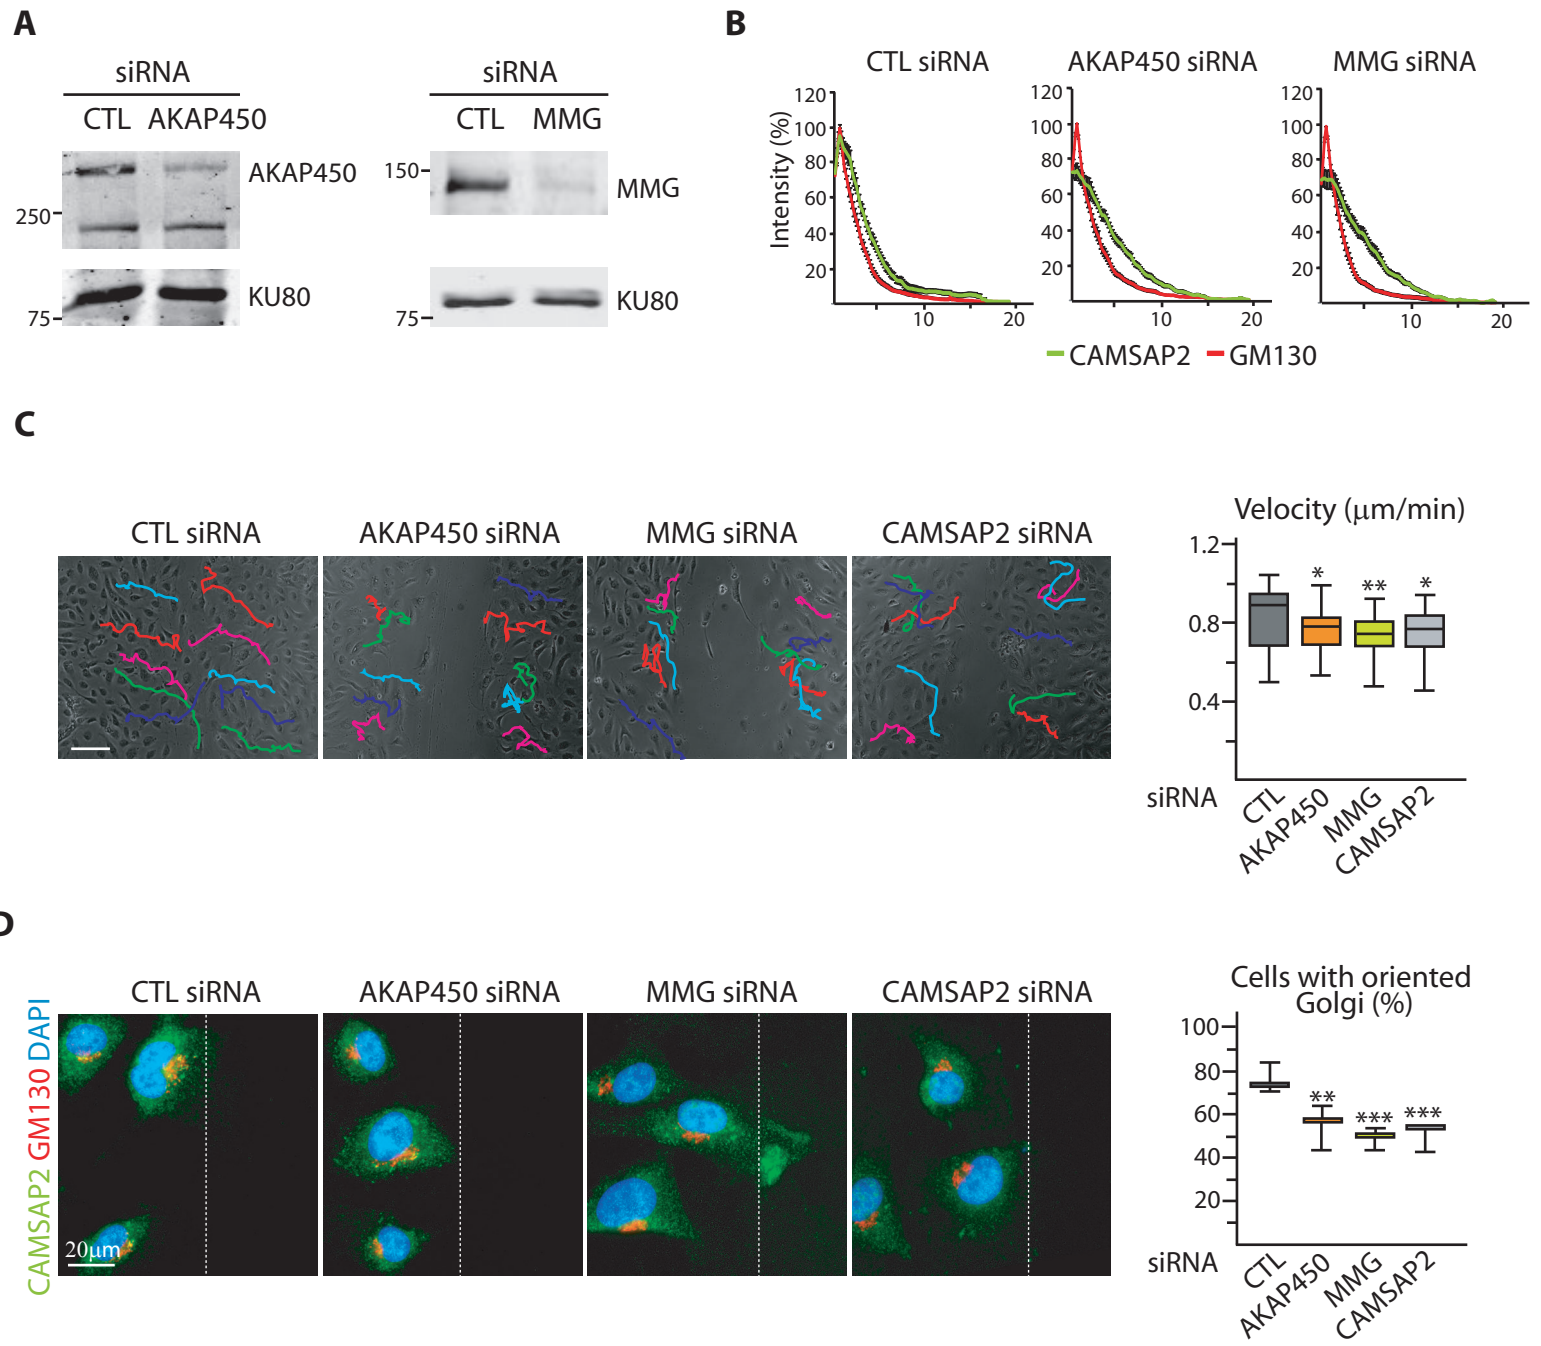

Supplement: supp [file elife-33864-supp-v1.zip]

Figure 5 - Figure Supplement 1 Martin et al.

**A**

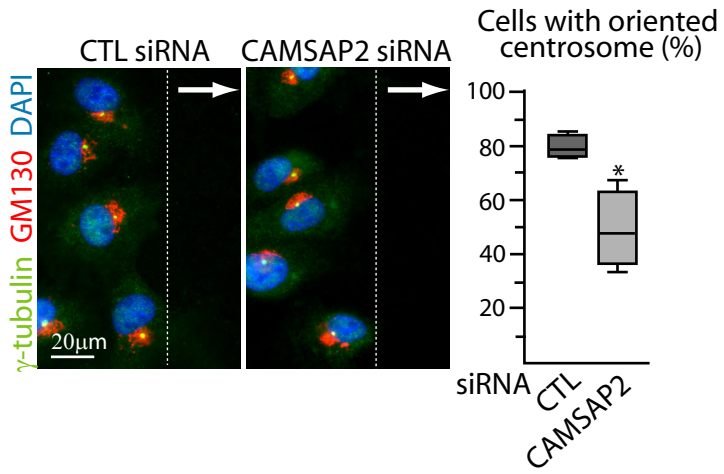

**B**

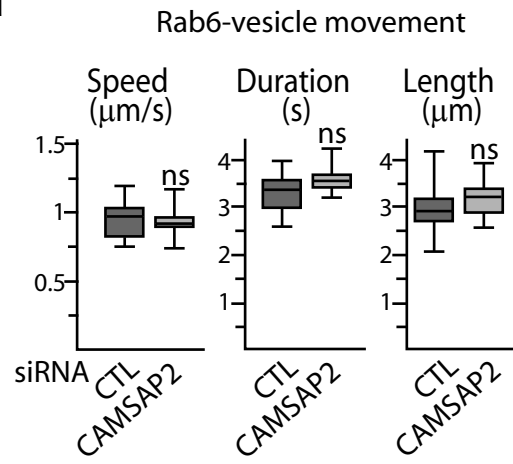

**C**

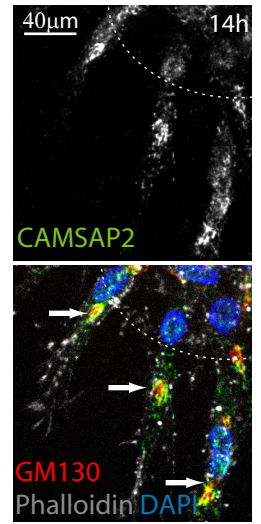

Supplement: supp [file elife-33864-supp-v1.zip]

Figure 1 - Figure Supplement 1 Martin et al.

**A**

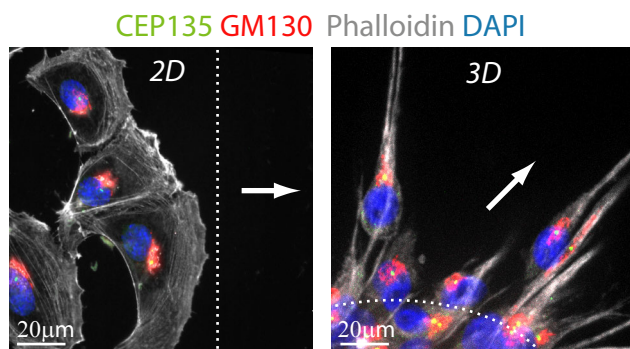

Cells with oriented Centrosome/Golgi (%)

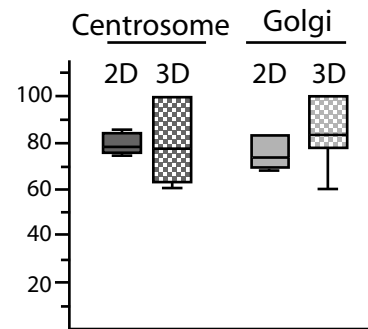

**B**

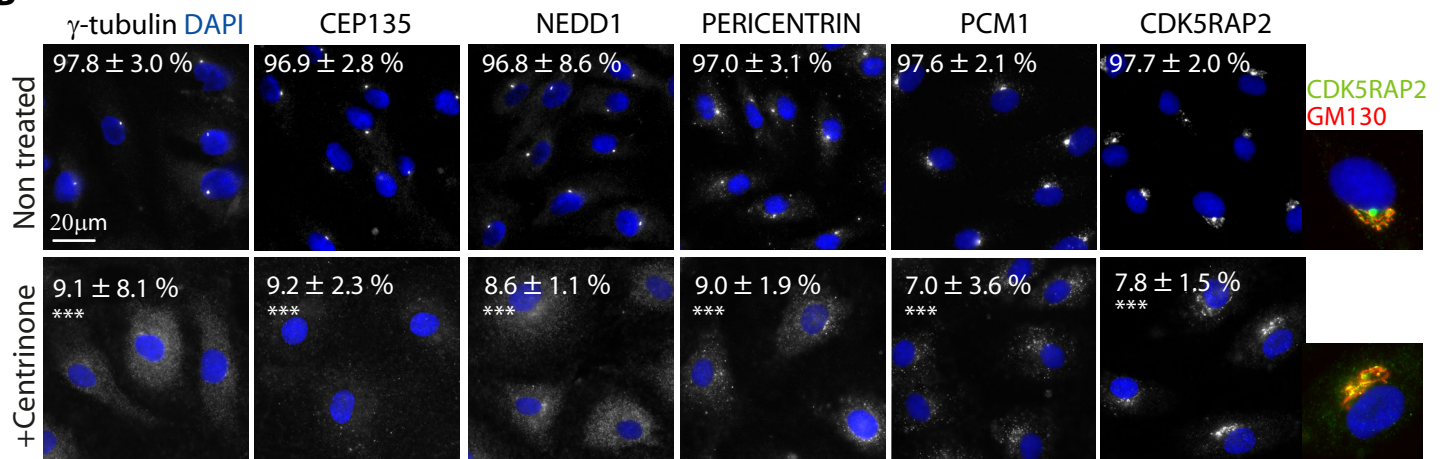

**C**

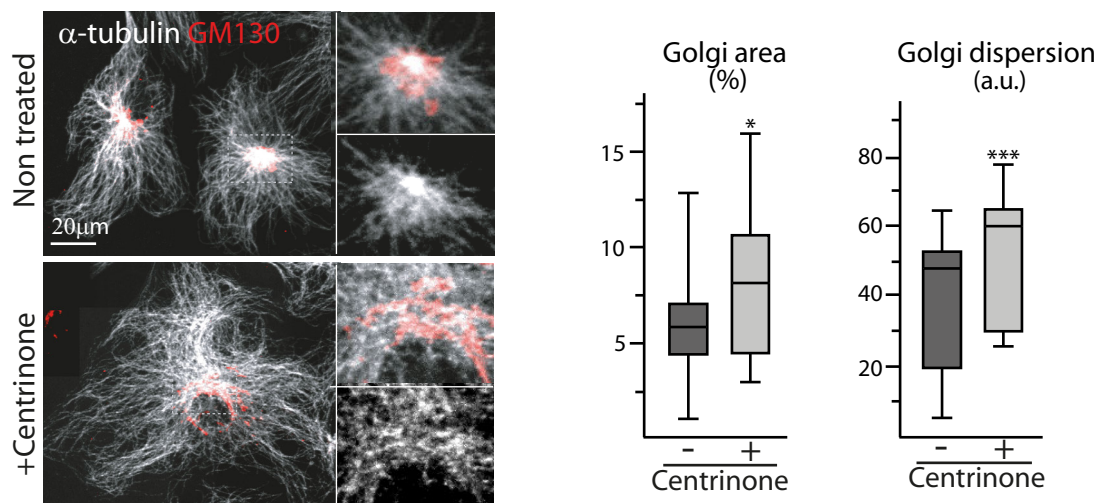

**D**

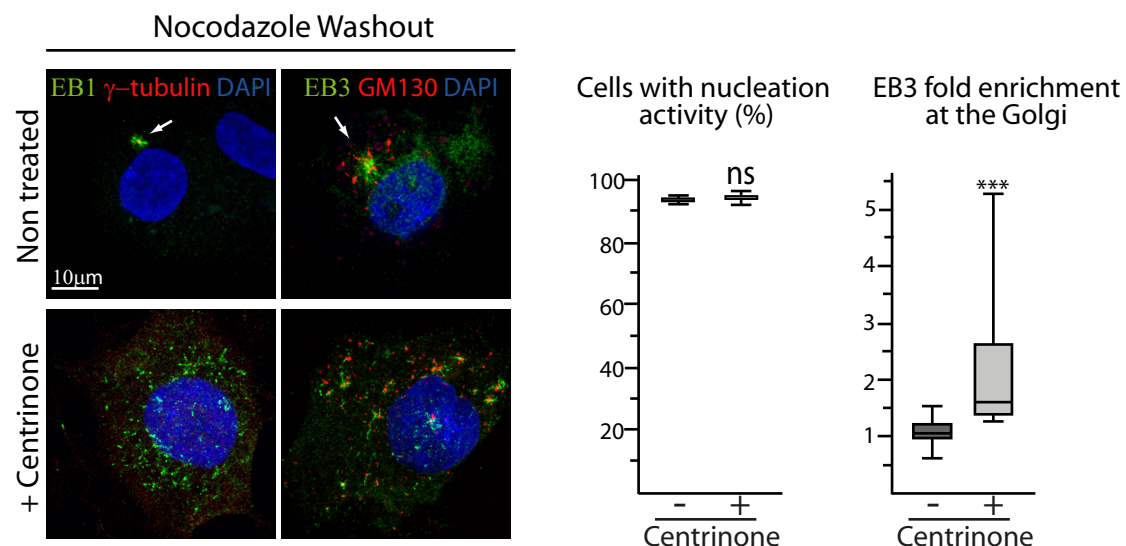

Supplement: supp [file elife-33864-supp-v1.zip]

Figure 1 - Figure Supplement 2 Martin et al.

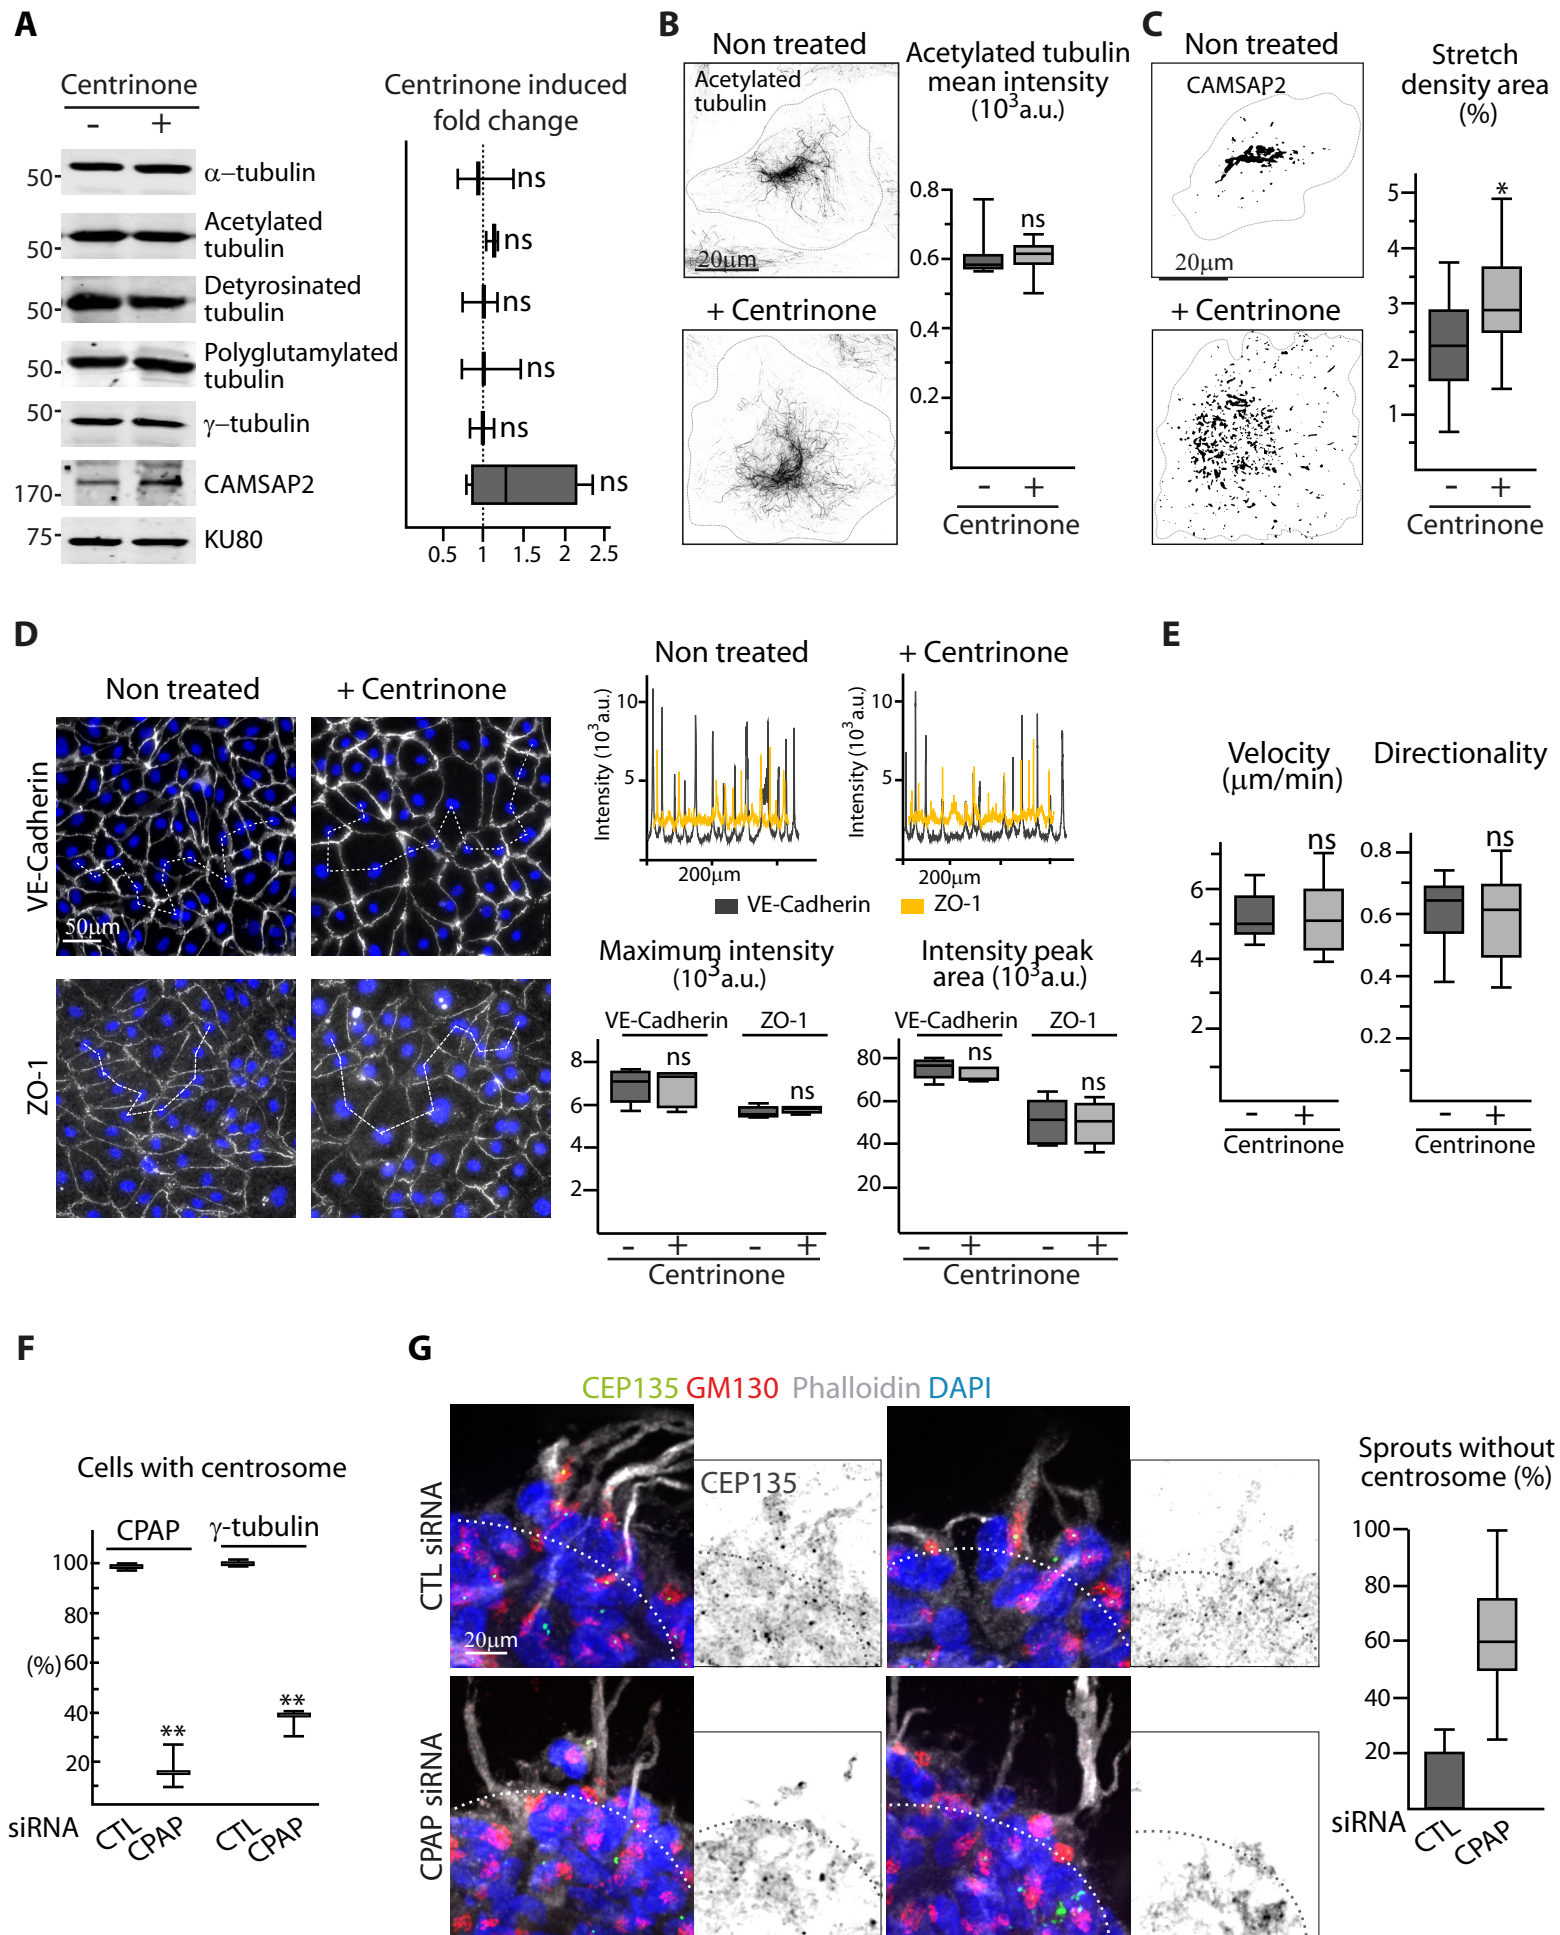

Supplement: supp [file elife-33864-supp-v1.zip]

Figure 2 - Figure Supplement 2 Martin et al.

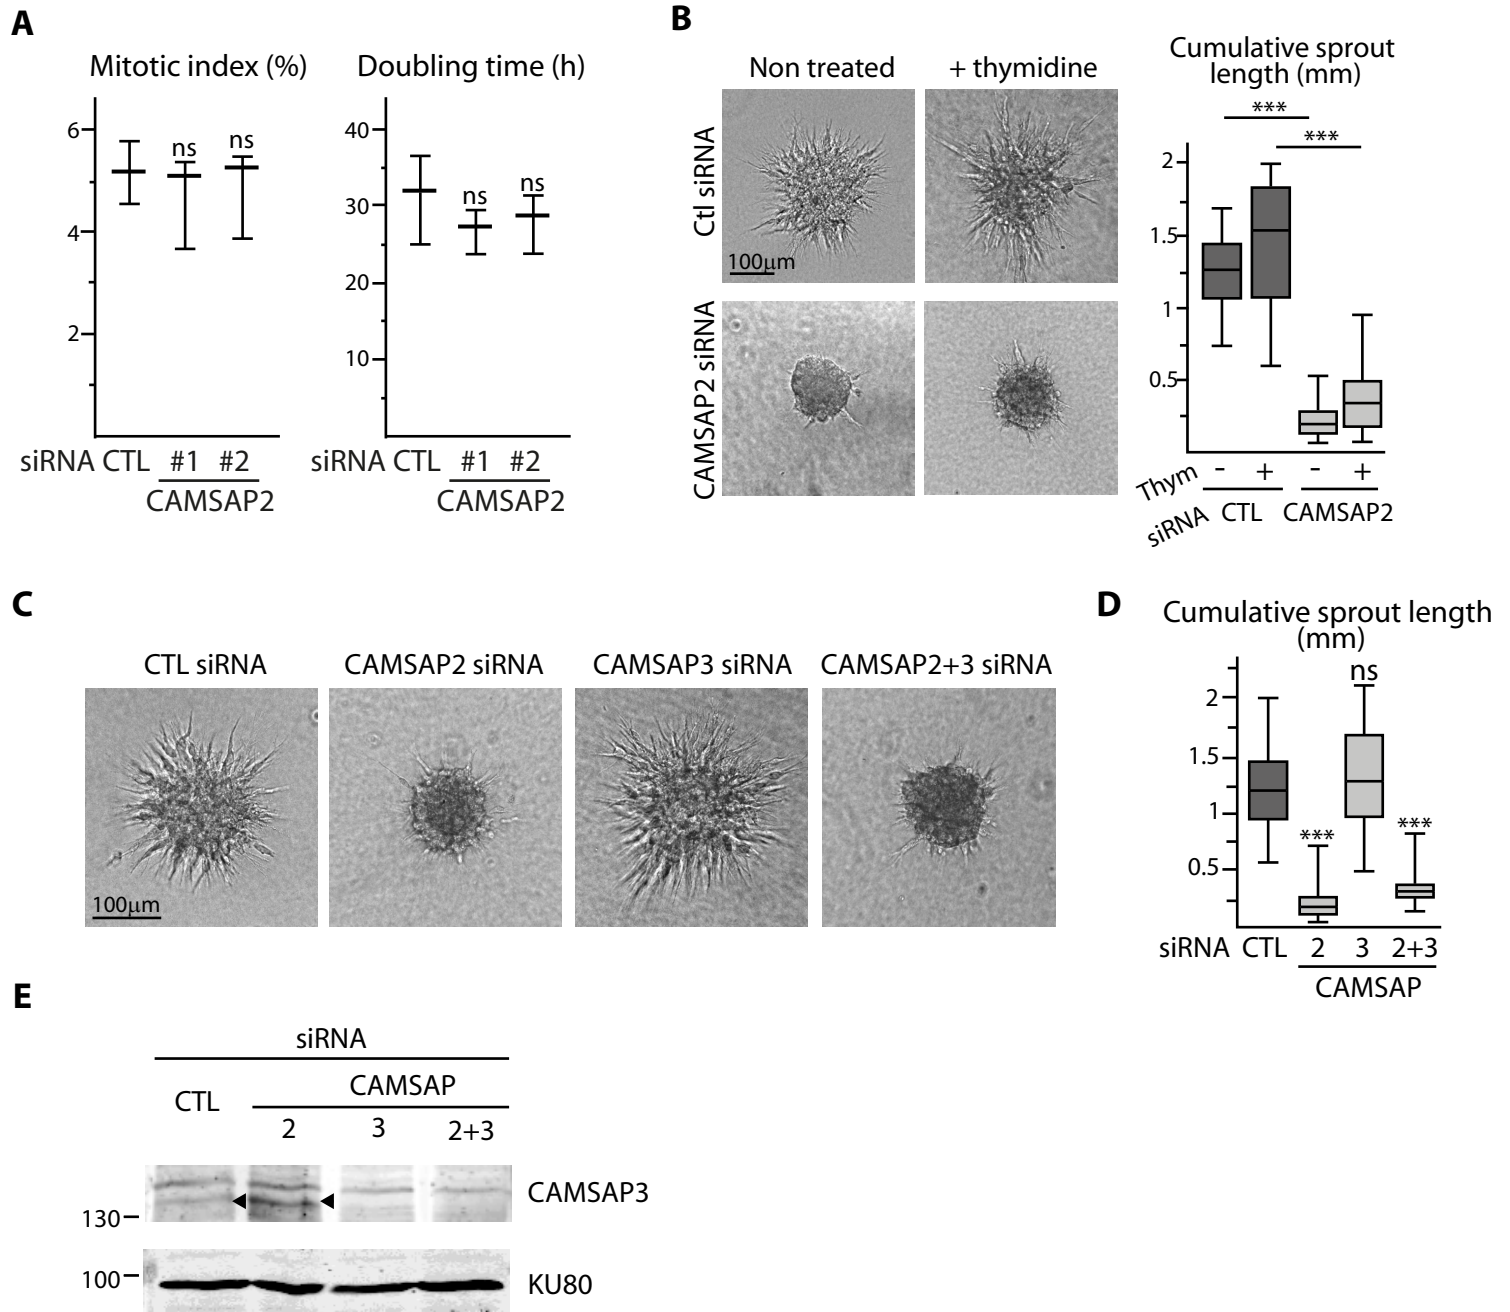

Supplement: supp [file elife-33864-supp-v1.zip]

Figure 9 - Figure Supplement 1 Martin et al.

**A**

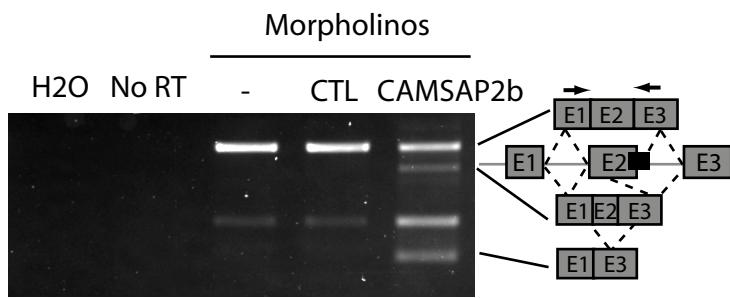

**B**

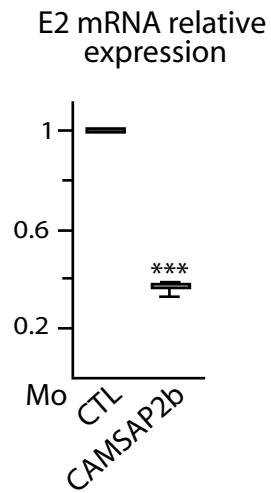

**C**

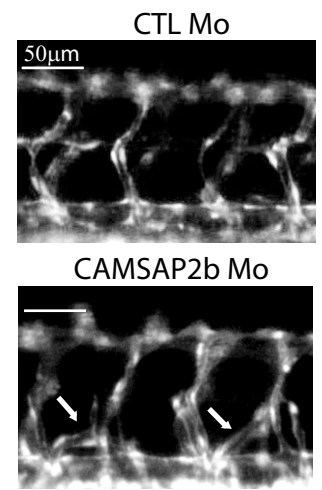

**D**

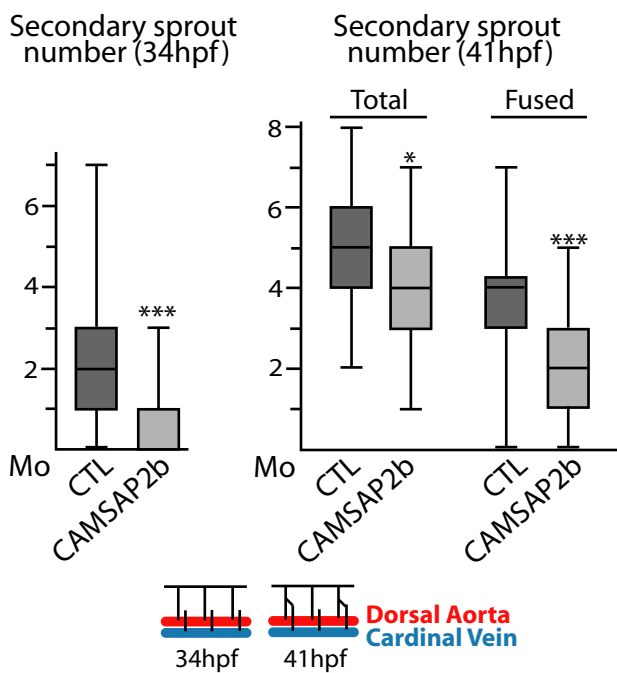

**E**

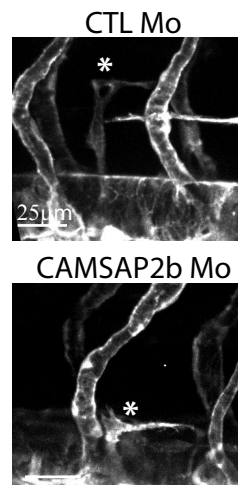

**F**

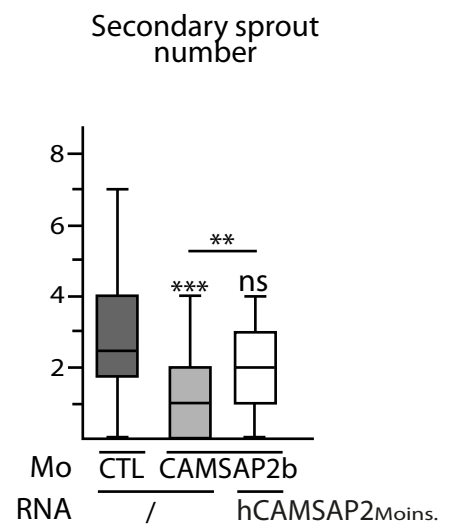

**G**

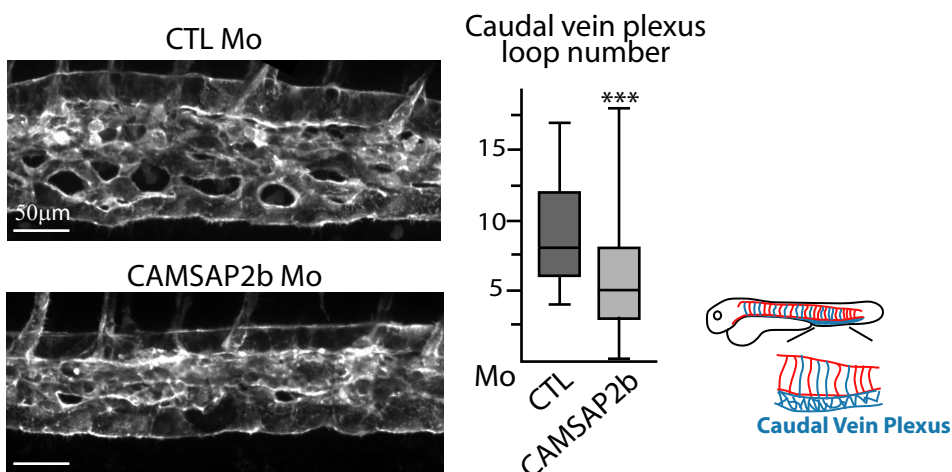

Supplement: supp [file elife-33864-supp-v1.zip]

Figure 4 - Figure Supplement 1 Martin et al.

**A**

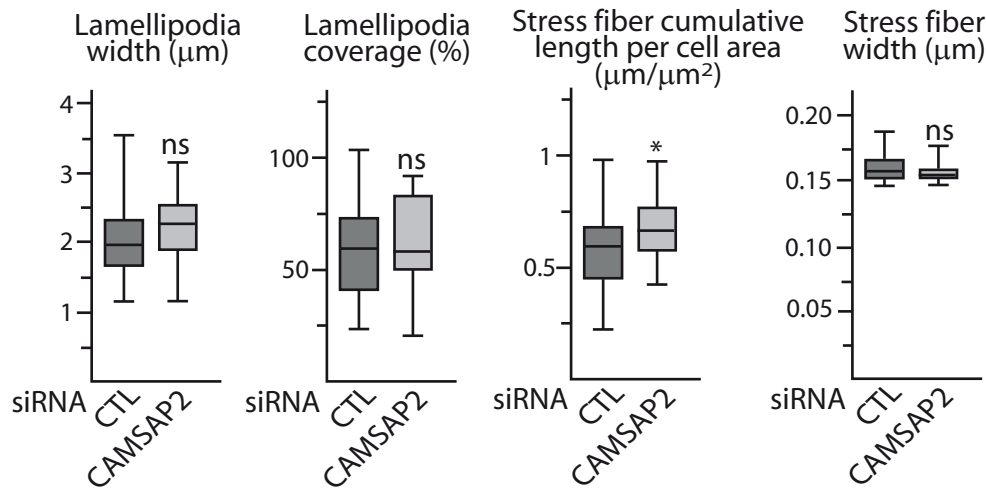

**B**

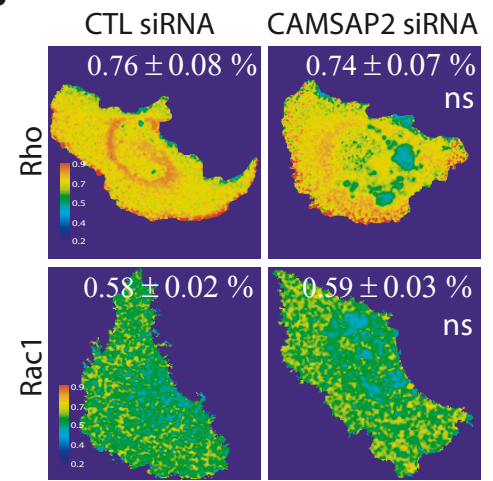

**C**

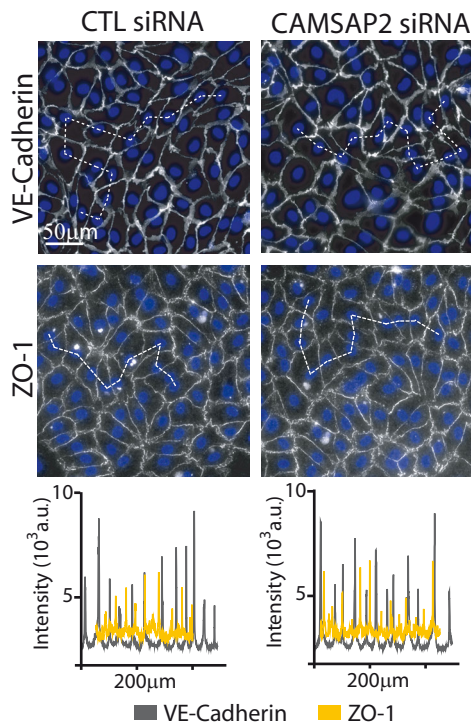

**D**

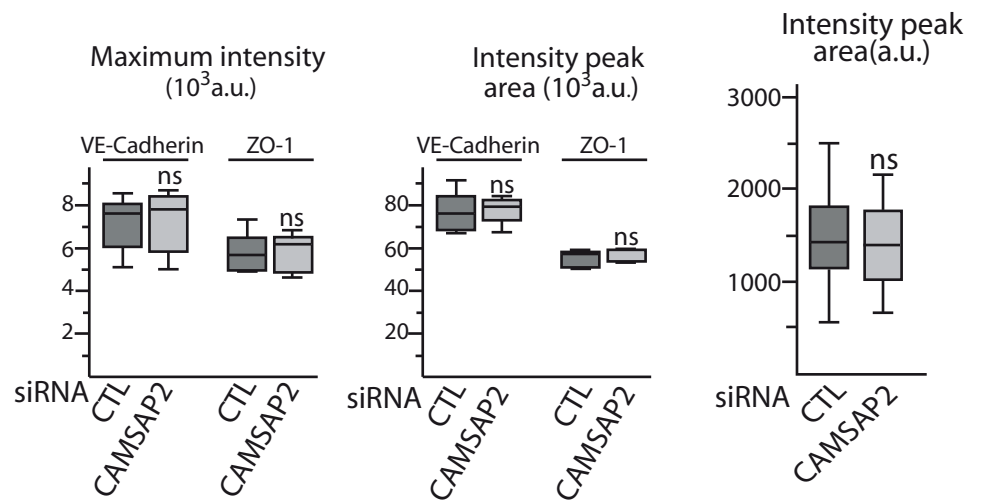

Supplement: supp [file elife-33864-supp-v1.zip]

Figure 7 - Figure Supplement 1 Martin et al.

**A**

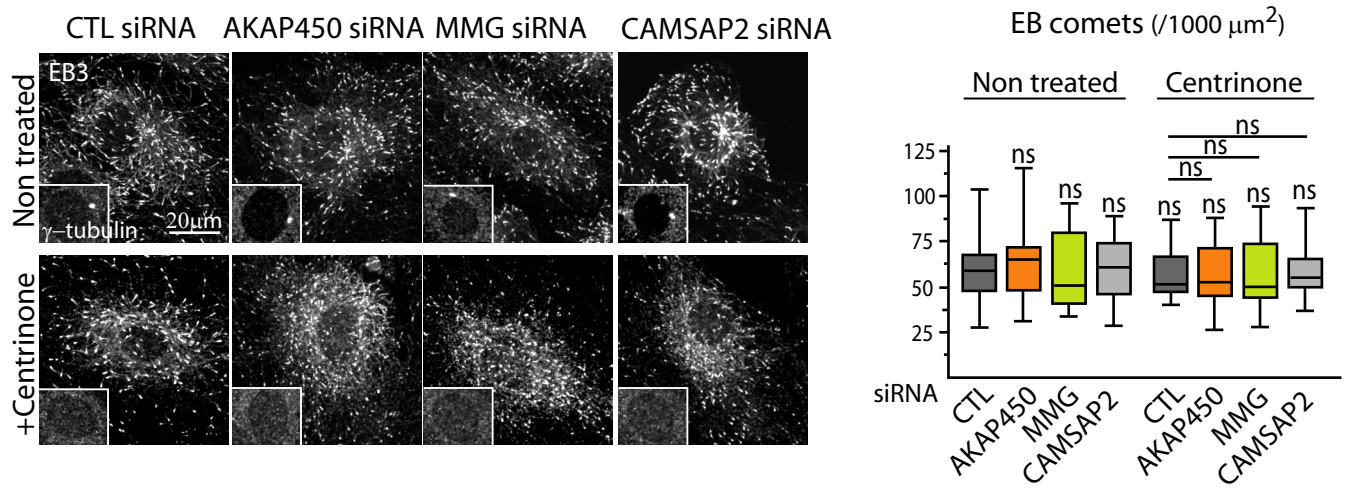

**B**

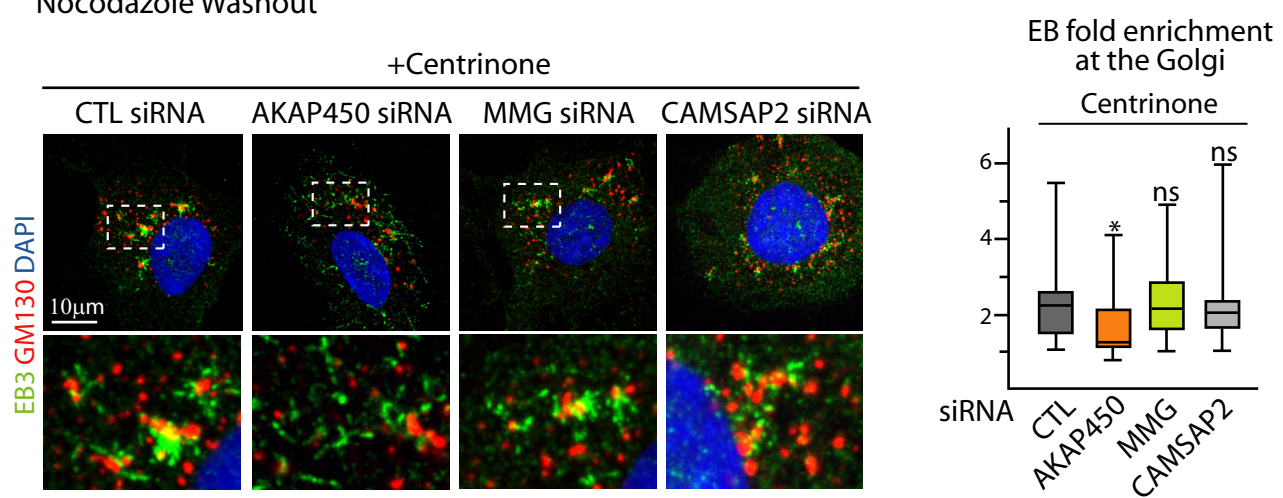

**C**

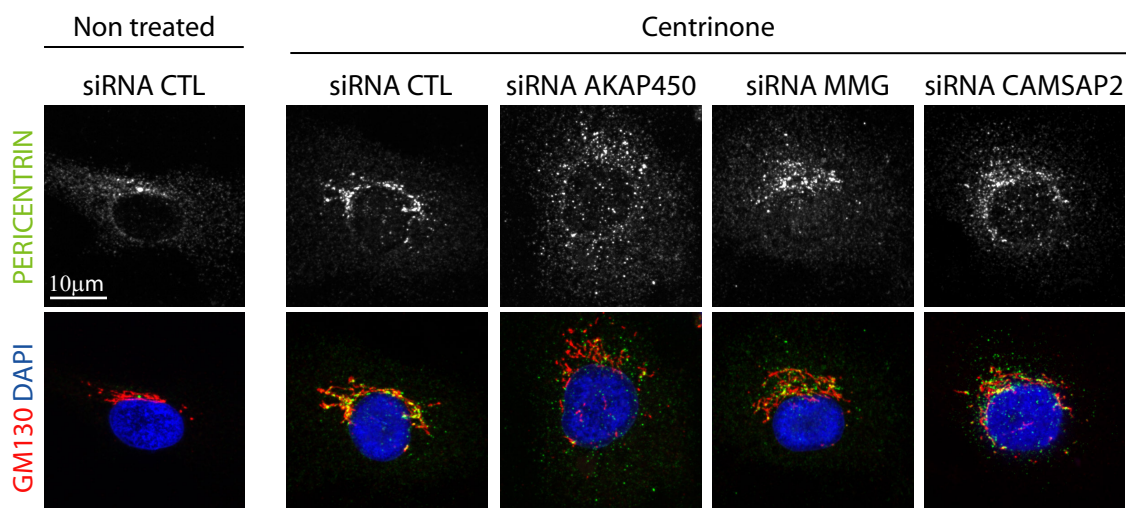

Supplement: supp [file elife-33864-supp-v1.zip]

Figure 3 - Figure Supplement 1 Martin et al.

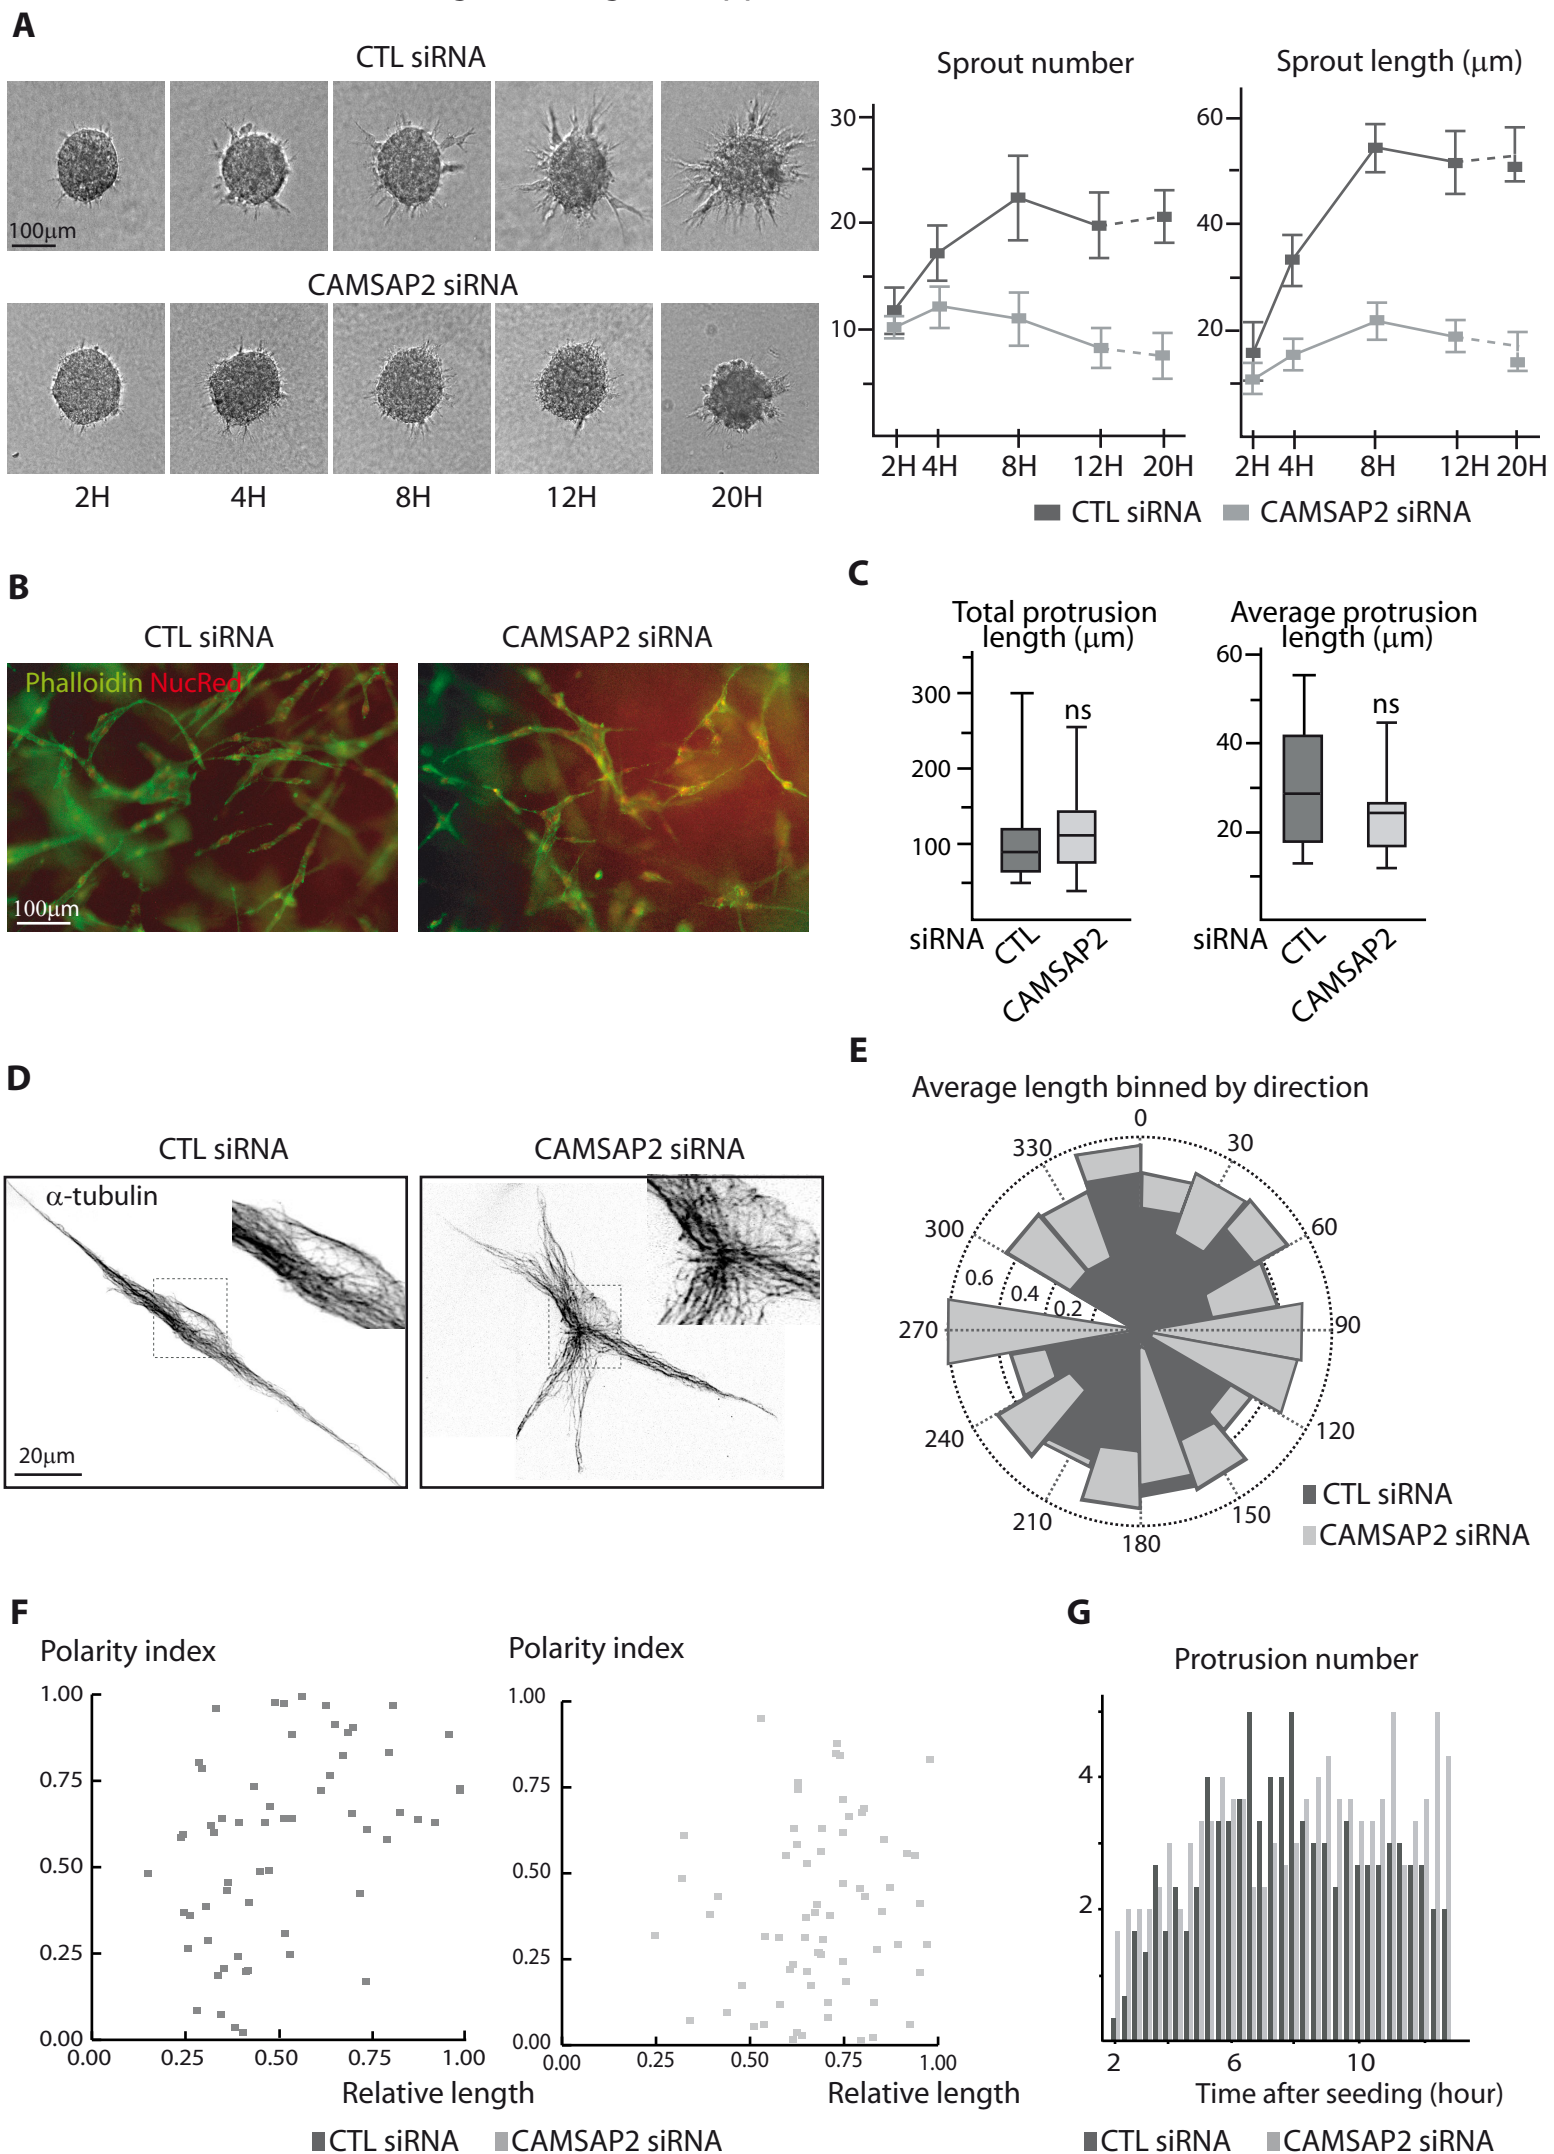

Supplement: supp [file elife-33864-supp-v1.zip]
